# Supplementary material for: Tandem cyclization/arylation of diaryliodoniums via in situ constructed benzoxazole as a directing group for atom-economical transformation
Source: Royal Society of Chemistry journal article supplement (doi:10.1039/d1qo01463c), 2022-01-01

**The general information for the synthetic experiments:** Synthesis details for key compounds are described here. All solvents were commercially available and were used without a further purification unless stated. The chemicals used were either purchased from commercial sources or prepared according to literature procedures. The  $^1\text{H}$  and  $^{13}\text{C}$  nuclear magnetic resonance (NMR) spectra were recorded on a Bruker Avance spectrometer 400 at 400 MHz and 100 MHz respectively. Chemical shifts are given in ppm ( $\delta$ ) referenced to  $\text{CDCl}_3$  with 7.26 for  $^1\text{H}$  and 77.10 for  $^{13}\text{C}$ , and to  $d_6$ -DMSO with 2.50 for  $^1\text{H}$  and 39.5 for  $^{13}\text{C}$ . In the case of multiplet, the signals are reported as intervals. Signals are abbreviated as follows: s, singlet; d, doublet; t, triplet; q, quartet; m, multiplet. Coupling constants are expressed in hertz. High-resolution mass spectra (HRMS) were recorded on Thermo Fisher spectrometer, Orbitrap QExactive GC/MS (EI mode) and Orbitrap QExactive LC/MS(ESI mode) or BRUKER VPXII spectrometer (ESI mode). The progress of the reactions was monitored by thin-layer chromatography on a glass plate coated with silica gel with fluorescent indicator (GF254). Column chromatography was performed on silica gel (200-300 mesh).

**Table S1. Optimization of the reaction conditions<sup>a</sup>**

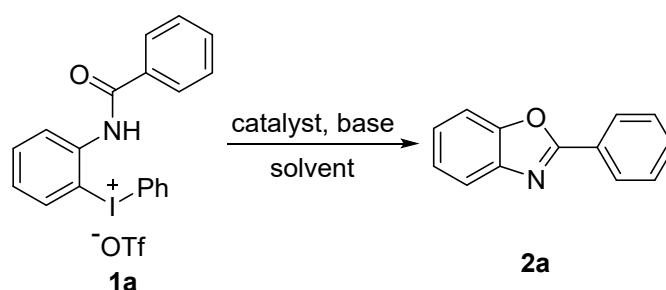

| Entry | Catalyst                                             | Base                     | Solvent | Temp. ( $^{\circ}\text{C}$ ) | Yield <sup>b</sup> (%) |
|-------|------------------------------------------------------|--------------------------|---------|------------------------------|------------------------|
| 1     | $\text{Ni}(\text{acac})_2$                           | $\text{Na}_2\text{CO}_3$ | DMF     | 40                           | 44                     |
| 2     | $\text{Ni}(\text{COD})_2$                            | $\text{Na}_2\text{CO}_3$ | DMF     | 40                           | 28                     |
| 3     | $\text{NiCl}_2$                                      | $\text{Na}_2\text{CO}_3$ | DMF     | 40                           | 42                     |
| 4     | $\text{NiBr}_2$                                      | $\text{Na}_2\text{CO}_3$ | DMF     | 40                           | 60                     |
| 5     | $\text{NiI}_2$                                       | $\text{Na}_2\text{CO}_3$ | DMF     | 40                           | 56                     |
| 6     | $\text{Ni}(\text{OAc})_2$                            | $\text{Na}_2\text{CO}_3$ | DMF     | 40                           | 0                      |
| 7     | $\text{Ni}(\text{BF}_4)_2 \cdot 6\text{H}_2\text{O}$ | $\text{Na}_2\text{CO}_3$ | DMF     | 40                           | 50                     |
| 8     | $\text{Ni}(\text{OTf})_2$                            | $\text{Na}_2\text{CO}_3$ | DMF     | 40                           | 64                     |
| 9     | $\text{CuI}$                                         | $\text{Na}_2\text{CO}_3$ | DMF     | 40                           | 23                     |
| 10    | ----                                                 | $\text{Na}_2\text{CO}_3$ | DMF     | 40                           | Trace                  |
| 11    | $\text{Ni}(\text{OTf})_2$                            | $\text{Na}_2\text{CO}_3$ | MeCN    | 40                           | 32                     |
| 12    | $\text{Ni}(\text{OTf})_2$                            | $\text{Na}_2\text{CO}_3$ | DCE     | 40                           | 21                     |
| 13    | $\text{Ni}(\text{OTf})_2$                            | $\text{Na}_2\text{CO}_3$ | EtOAc   | 40                           | 18                     |
| 14    | $\text{Ni}(\text{OTf})_2$                            | $\text{Na}_2\text{CO}_3$ | EtOH    | 40                           | 23                     |
| 15    | $\text{Ni}(\text{OTf})_2$                            | $\text{Na}_2\text{CO}_3$ | dioxane | 40                           | 28                     |
| 16    | $\text{Ni}(\text{OTf})_2$                            | $\text{Na}_2\text{CO}_3$ | THF     | 40                           | 36                     |
| 17    | $\text{Ni}(\text{OTf})_2$                            | $\text{Na}_2\text{CO}_3$ | HFIP    | 40                           | 63                     |
| 18    | $\text{Ni}(\text{OTf})_2$                            | $\text{Na}_2\text{CO}_3$ | DMSO    | 40                           | 75                     |
| 19    | $\text{Ni}(\text{OTf})_2$                            | $\text{Na}_2\text{CO}_3$ | DMSO    | 60                           | 91                     |
| 20    | $\text{Ni}(\text{OTf})_2$                            | $\text{Na}_2\text{CO}_3$ | DMSO    | 80                           | 99 (98 <sup>c</sup> )  |

|    |                      |                                |      |    |    |
|----|----------------------|--------------------------------|------|----|----|
| 21 | Ni(OTf) <sub>2</sub> | NaOAc                          | DMSO | 80 | 0  |
| 22 | Ni(OTf) <sub>2</sub> | NaHCO <sub>3</sub>             | DMSO | 80 | 83 |
| 23 | Ni(OTf) <sub>2</sub> | NaOH                           | DMSO | 80 | 72 |
| 24 | Ni(OTf) <sub>2</sub> | K <sub>3</sub> PO <sub>4</sub> | DMSO | 80 | 87 |
| 25 | Ni(OTf) <sub>2</sub> | Et <sub>3</sub> N              | DMSO | 80 | 52 |
| 26 | Ni(OTf) <sub>2</sub> | <i>t</i> BuOK                  | DMSO | 80 | 28 |

<sup>a</sup>Reaction conditions: diphenyliodonium **1a** (0.1 mmol), nickel catalysts (0.05 equiv.), base (1.5 equiv.), solvent (0.5 mL), 6 h, argon. <sup>b</sup>NMR yield. <sup>c</sup>Isolated yield. DCE: 1,2-dichloroethane; HFIP: hexafluoroisopropanol.

#### General procedure for nickel catalyzed synthesis benzoxazole derivatives **2** and **4**:

To iodonium **1** (55 mg, 0.1 mmol) in a flask was added Na<sub>2</sub>CO<sub>3</sub> (16 mg, 1.5 equiv.), Ni(OTf)<sub>2</sub> (1.8 mg, 5 mol%), DMSO (1.0 mL). The reaction flask was evacuated and backfilled with argon three times, the reaction mixture was stirred at 80 °C heated by an oil bath for 6h. The reaction was monitored by TLC. After the reaction was finished, the residue was dissolved in EtOAc, washed with H<sub>2</sub>O and brine, and dried over anhydrous Na<sub>2</sub>SO<sub>4</sub>, then evaporated under vacuum. The residue was purified by column chromatography on silica gel (PE/EA = 1/50- 1/10) to provide **2** or **4**.

#### Characterization data of products

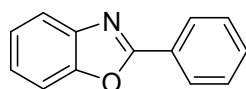

**2a**

**2-Phenylbenzo[d]oxazole (2a)**: The product was isolated as a white solid (19 mg, 98%). mp 98 – 100 °C; <sup>1</sup>H NMR (400 MHz, CDCl<sub>3</sub>) δ 8.32 – 8.22 (m, 2H), 7.79 (dd, *J* = 5.8, 3.3 Hz, 1H), 7.59 (dd, *J* = 6.0, 3.2 Hz, 1H), 7.56 – 7.50 (m, 3H), 7.39 – 7.32 (m, 2H) ppm. <sup>13</sup>C NMR (100 MHz, CDCl<sub>3</sub>) δ 163.2, 150.9, 142.2, 131.7, 129.1, 127.8, 127.3, 125.3, 124.7, 120.2, 110.8 ppm. HRMS (ESI, *m/z*) calcd for C<sub>13</sub>H<sub>10</sub>NO [M+H]<sup>+</sup>: 196.07569, found: 196.07568.

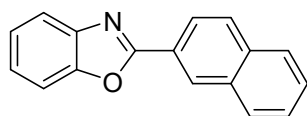

**2b**

**2-(Naphthalen-2-yl)benzo[d]oxazole (2b)**: The product was isolated as a white solid (22 mg, 90%). mp 107-109 °C <sup>1</sup>H NMR (400 MHz, CDCl<sub>3</sub>) δ 8.79 (s, 1H), 8.33 (dd, *J* = 8.6, 1.5 Hz, 1H), 7.99 (dd, *J* = 8.6, 5.3 Hz, 2H), 7.93 – 7.87 (m, 1H), 7.82 (dd, *J* = 5.8, 3.2 Hz, 1H), 7.63 (dd, *J* = 5.9, 3.2 Hz, 1H), 7.58 (ddt, *J* = 10.8, 7.0, 3.5 Hz, 2H), 7.43 – 7.32 (m, 2H) ppm. <sup>13</sup>C NMR (100 MHz, CDCl<sub>3</sub>) δ 163.4, 151.0, 142.3, 134.9, 133.1, 129.1, 129.0, 128.4, 128.1, 128.0, 127.1, 125.4, 124.8, 124.5, 124.1, 120.2, 110.8 ppm. HRMS (ESI, *m/z*) calcd for C<sub>17</sub>H<sub>12</sub>NO [M+H]<sup>+</sup>: 246.09134, found: 246.09113.

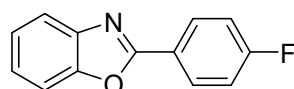

**2c**

**2-(4-Fluorophenyl)benzo[d]oxazole (2c)**: The product was isolated as a white solid (20 mg, 92%). mp

95-97 °C; <sup>1</sup>H NMR (400 MHz, CDCl<sub>3</sub>) δ 8.31 – 8.22 (m, 2H), 7.80 – 7.73 (m, 1H), 7.57 (dt, *J* = 9.6, 3.6 Hz, 1H), 7.40 – 7.32 (m, 2H), 7.26 – 7.17 (m, 2H) ppm. <sup>13</sup>C NMR (100 MHz, CDCl<sub>3</sub>) δ 165.0 (d, *J*<sub>C-F</sub> = 250.0 Hz), 162.3, 150.9, 142.2, 130.0 (d, *J*<sub>C-F</sub> = 9.0 Hz), 125.3, 124.8, 123.6 (d, *J*<sub>C-F</sub> = 3.0 Hz), 120.1, 116.3 (d, *J*<sub>C-F</sub> = 23.0 Hz), 110.7 ppm. HRMS (ESI, *m/z*) calcd for C<sub>13</sub>H<sub>9</sub>NOF [M+H]<sup>+</sup>: 214.06627, found: 214.06618.

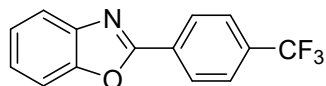

**2d**

**2-(4-(Trifluoromethyl)phenyl)benzo[d]oxazole (2d):** The product was isolated as a white solid (24 mg, 91%). mp 141-142 °C; <sup>1</sup>H NMR (400 MHz, CDCl<sub>3</sub>) δ 8.38 (d, *J* = 8.2 Hz, 2H), 7.83 – 7.75 (m, 3H), 7.64 – 7.59 (m, 1H), 7.44 – 7.36 (m, 2H) ppm. <sup>13</sup>C NMR (100 MHz, CDCl<sub>3</sub>) δ 161.6, 151.0, 142.0, 133.1 (q, *J*<sub>C-F</sub> = 27.0 Hz), 130.6, 128.0, 126.1 (q, *J*<sub>C-F</sub> = 3.0 Hz), 126.0, 125.1, 122.8, 120.6, 111.0 ppm. HRMS (ESI, *m/z*) calcd for C<sub>14</sub>H<sub>9</sub>NOF<sub>3</sub> [M+H]<sup>+</sup>: 264.06290, found: 264.06308.

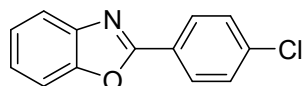

**2e**

**2-(4-Chlorophenyl)benzo[d]oxazole (2e):** The product was isolated as a white solid (22 mg, 95%). mp 146-147 °C; <sup>1</sup>H NMR (500 MHz, CDCl<sub>3</sub>) δ 8.20 (d, *J* = 8.5 Hz, 2H), 7.78 (dd, *J* = 6.1, 2.9 Hz, 1H), 7.58 (dd, *J* = 6.3, 2.8 Hz, 1H), 7.51 (d, *J* = 8.5 Hz, 2H), 7.42 – 7.34 (m, 2H) ppm. <sup>13</sup>C NMR (100 MHz, CDCl<sub>3</sub>) δ 162.2, 150.8, 142.1, 137.9, 129.4, 129.0, 125.8, 125.5, 124.9, 120.2, 110.8 ppm. HRMS (ESI, *m/z*) calcd for C<sub>13</sub>H<sub>9</sub>NOCl [M+H]<sup>+</sup>: 230.03672, found: 230.03658.

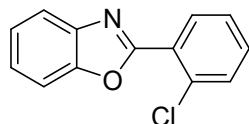

**2f**

**2-(2-Chlorophenyl)benzo[d]oxazole (2f):** The product was isolated as a white solid (21 mg, 91%). mp 74 °C; <sup>1</sup>H NMR (500 MHz, CDCl<sub>3</sub>) δ 8.16 (d, *J* = 7.5 Hz, 1H), 7.91 – 7.81 (m, 1H), 7.63 (dd, *J* = 5.8, 2.5 Hz, 1H), 7.57 (d, *J* = 7.8 Hz, 1H), 7.50 – 7.35 (m, 4H) ppm. <sup>13</sup>C NMR (100 MHz, CDCl<sub>3</sub>) δ 161.1, 150.7, 141.8, 133.6, 132.0, 131.9, 131.5, 127.1, 126.4, 125.7, 124.8, 120.6, 110.9 ppm. HRMS (ESI, *m/z*) calcd for C<sub>13</sub>H<sub>9</sub>NOCl [M+H]<sup>+</sup>: 230.03672, found: 230.03650.

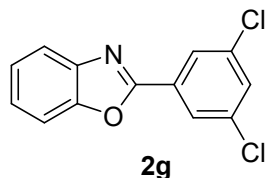

**2g**

**2-(3,5-Dichlorophenyl)benzo[d]oxazole (2g):** The product was isolated as a white solid (24 mg, 92%). mp 134-136 °C; <sup>1</sup>H NMR (500 MHz, CDCl<sub>3</sub>) δ 8.14 (s, 2H), 7.79 (d, *J* = 7.5 Hz, 1H), 7.59 (d, *J* = 7.5 Hz, 1H), 7.51 (s, 1H), 7.46 – 7.35 (m, 2H) ppm. <sup>13</sup>C NMR (100 MHz, CDCl<sub>3</sub>) δ 160.5, 150.9, 141.8, 135.9, 131.3, 130.0, 126.1, 125.9, 125.2, 120.6, 110.9 ppm. HRMS (ESI, *m/z*) calcd for C<sub>13</sub>H<sub>8</sub>NOCl<sub>2</sub> [M+H]<sup>+</sup>: 263.99775, found: 263.99750.

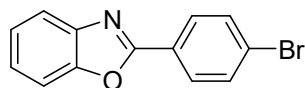

**2h**

**2-(4-Bromophenyl)benzo[d]oxazole (2h):** The product was isolated as a white solid (26 mg, 95%). mp 147-149 °C; <sup>1</sup>H NMR (500 MHz, CDCl<sub>3</sub>) δ 8.13 (d, *J* = 8.6 Hz, 2H), 7.78 (dd, *J* = 6.2, 2.9 Hz, 1H), 7.67 (d, *J* = 8.5 Hz, 2H), 7.58 (dd, *J* = 6.1, 3.0 Hz, 1H), 7.40 – 7.34 (m, 2H) ppm. <sup>13</sup>C NMR (100 MHz, CDCl<sub>3</sub>) δ 162.2, 150.9, 142.1, 132.3, 129.1, 126.4, 126.2, 125.5, 124.9, 120.2, 110.8 ppm. HRMS (ESI, *m/z*) calcd for C<sub>13</sub>H<sub>9</sub>NOBr [M+H]<sup>+</sup>: 273.98620, found: 273.98584.

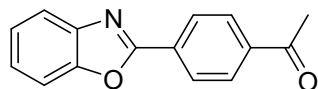

**2i**

**1-(4-(Benzo[d]oxazol-2-yl)phenyl)ethan-1-one (2i):** The product was isolated as a white solid (21 mg, 88%). mp 170-173 °C; <sup>1</sup>H NMR (400 MHz, CDCl<sub>3</sub>) δ 8.35 (d, *J* = 8.3 Hz, 2H), 8.09 (d, *J* = 8.4 Hz, 2H), 7.86 – 7.76 (m, 1H), 7.65 – 7.57 (m, 1H), 7.39 (p, *J* = 6.9 Hz, 2H), 2.66 (s, 3H) ppm. <sup>13</sup>C NMR (100 MHz, CDCl<sub>3</sub>) δ 197.5, 162.0, 151.0, 142.1, 139.1, 131.2, 129.0, 127.9, 125.9, 125.0, 120.5, 110.9, 26.9 ppm. HRMS (ESI, *m/z*) calcd for C<sub>15</sub>H<sub>12</sub>NO<sub>2</sub> [M+H]<sup>+</sup>: 238.08626, found: 238.08611.

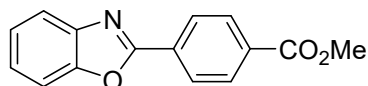

**2j**

**Methyl 4-(benzo[d]oxazol-2-yl)benzoate (2j):** The product was isolated as a white solid (21 mg, 84%). mp 195-197 °C; <sup>1</sup>H NMR (500 MHz, CDCl<sub>3</sub>) δ 8.34 (d, *J* = 8.5 Hz, 2H), 8.20 (d, *J* = 8.5 Hz, 2H), 7.85 – 7.76 (m, 1H), 7.66 – 7.57 (m, 1H), 7.46 – 7.34 (m, 2H), 3.97 (s, 3H) ppm. <sup>13</sup>C NMR (100 MHz, CDCl<sub>3</sub>) δ 166.4, 162.0, 151.0, 142.1, 132.6, 131.1, 130.2, 127.6, 125.8, 125.0, 120.5, 110.9, 52.5 ppm. HRMS (ESI, *m/z*) calcd for C<sub>15</sub>H<sub>12</sub>NO<sub>3</sub> [M+H]<sup>+</sup>: 254.08117, found: 254.08089.

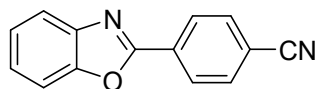

**2k**

**4-(Benzo[d]oxazol-2-yl)benzonitrile (2k):** The product was isolated as a white solid (19 mg, 87%). mp 199-201 °C; <sup>1</sup>H NMR (400 MHz, CDCl<sub>3</sub>) δ 8.41 – 8.30 (m, 2H), 7.86 – 7.75 (m, 3H), 7.65 – 7.58 (m, 1H), 7.46 – 7.35 (m, 2H) ppm. <sup>13</sup>C NMR (100 MHz, CDCl<sub>3</sub>) δ 161.0, 151.0, 142.0, 132.8, 131.2, 128.1, 126.3, 125.3, 120.7, 118.3, 114.9, 111.0 ppm. HRMS (ESI, *m/z*) calcd for C<sub>14</sub>H<sub>9</sub>N<sub>2</sub>O [M+H]<sup>+</sup>: 221.07094, found: 221.07092.

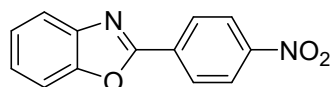

**2l**

**2-(4-Nitrophenyl)benzo[d]oxazole (2l):** The product was isolated as a white solid (19 mg, 79%). mp 180-182 °C; <sup>1</sup>H NMR (400 MHz, CDCl<sub>3</sub>) δ 8.49 – 8.33 (m, 4H), 7.87 – 7.81 (m, 1H), 7.67 – 7.61 (m, 1H), 7.48 – 7.40 (m, 2H) ppm. <sup>13</sup>C NMR (100 MHz, CDCl<sub>3</sub>) δ 160.8, 151.2, 149.6, 142.0, 132.9, 128.6, 126.5, 125.4, 124.4, 120.8, 111.1 ppm. HRMS (ESI, *m/z*) calcd for C<sub>13</sub>H<sub>9</sub>N<sub>2</sub>O<sub>3</sub> [M+H]<sup>+</sup>: 241.06077,

found: 241.06044.

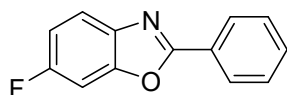

**2m**

**6-Fluoro-2-phenylbenzo[d]oxazole (2m):** The product was isolated as a white solid (18 mg, 83%). mp 95-97 °C; <sup>1</sup>H NMR (400 MHz, CDCl<sub>3</sub>) δ 8.28 – 8.17 (m, 2H), 7.70 (dd, *J* = 8.7, 4.9 Hz, 1H), 7.59 – 7.48 (m, 3H), 7.31 (dd, *J* = 8.0, 2.4 Hz, 1H), 7.15 – 7.07 (m, 1H) ppm. <sup>13</sup>C NMR (100 MHz, CDCl<sub>3</sub>) δ 160.8 (d, *J*<sub>C-F</sub> = 243.0 Hz), 159.6, 138.5, 131.8, 129.1, 127.6, 127.0, 120.4 (d, *J*<sub>C-F</sub> = 10.0 Hz), 112.7 (d, *J*<sub>C-F</sub> = 25.0 Hz), 99.0, 98.7 ppm. HRMS (ESI, *m/z*) calcd for C<sub>13</sub>H<sub>9</sub>NOF [M+H]<sup>+</sup>: 214.06627, found: 214.06615.

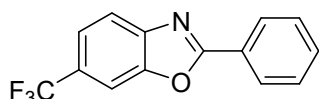

**2n**

**2-Phenyl-6-(trifluoromethyl)benzo[d]oxazole (2n):** The product was isolated as a white solid (19 mg, 73%). mp 80-82 °C; <sup>1</sup>H NMR (400 MHz, CDCl<sub>3</sub>) δ 8.30 – 8.24 (m, 2H), 7.86 (d, *J* = 9.0 Hz, 2H), 7.64 (d, *J* = 8.3 Hz, 1H), 7.62 – 7.51 (m, 3H) ppm. <sup>13</sup>C NMR (100 MHz, CDCl<sub>3</sub>) δ 165.5, 155.1, 150.3, 145.0, 132.4, 129.2, 128.1, 126.6, 124.3 (q, *J*<sub>C-F</sub> = 271.0 Hz), 122.4 (q, *J*<sub>C-F</sub> = 4.0 Hz), 120.5, 108.5 ppm. HRMS (ESI, *m/z*) calcd for C<sub>14</sub>H<sub>9</sub>NOF<sub>3</sub> [M+H]<sup>+</sup>: 264.06308, found: 264.06281.

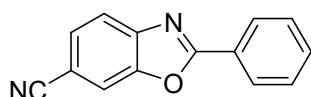

**2o**

**2-Phenylbenzo[d]oxazole-6-carbonitrile (2o):** The product was isolated as a white solid (17 mg, 76%). mp 182-185 °C; <sup>1</sup>H NMR (400 MHz, CDCl<sub>3</sub>) δ 8.27 (d, *J* = 7.6 Hz, 2H), 7.89 (s, 1H), 7.83 (d, *J* = 8.2 Hz, 1H), 7.65 (d, *J* = 8.2 Hz, 1H), 7.61 (t, *J* = 7.2 Hz, 1H), 7.56 (t, *J* = 7.5 Hz, 2H) ppm. <sup>13</sup>C NMR (100 MHz, CDCl<sub>3</sub>) δ 166.2, 150.1, 146.1, 132.8, 129.3, 129.0, 128.3, 126.1, 121.1, 118.9, 115.0, 108.2 ppm. HRMS (ESI, *m/z*) calcd for C<sub>14</sub>H<sub>9</sub>N<sub>2</sub>O [M+H]<sup>+</sup>: 221.07094, found: 221.07085.

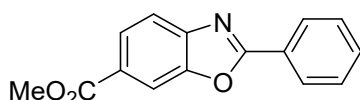

**2p**

**Methyl 2-phenylbenzo[d]oxazole-6-carboxylate (2p):** The product was isolated as a white solid (20 mg, 78 %). mp 132-135 °C; <sup>1</sup>H NMR (400 MHz, CDCl<sub>3</sub>) δ 8.28 (dd, *J* = 8.0, 1.6 Hz, 3H), 8.09 (dd, *J* = 8.4, 1.5 Hz, 1H), 7.79 (d, *J* = 8.4 Hz, 1H), 7.60 – 7.50 (m, 3H), 3.97 (s, 3H) ppm. <sup>13</sup>C NMR (100 MHz, CDCl<sub>3</sub>) δ 166.8, 165.7, 150.6, 146.2, 132.4, 129.2, 128.1, 127.2, 126.7, 126.6, 119.7, 112.4, 52.5 ppm. HRMS (ESI, *m/z*) calcd for C<sub>15</sub>H<sub>12</sub>NO<sub>3</sub> [M+H]<sup>+</sup>: 254.08117, found: 254.08086.

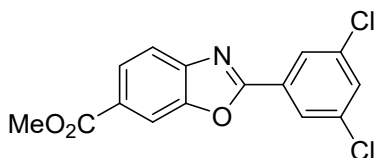

**2q**

**Methyl 2-(3,5-dichlorophenyl)benzo[d]oxazole-6-carboxylate (2q):** The product was isolated as a white solid (26 mg, 81%). mp 175-177 °C <sup>1</sup>H NMR (400 MHz, CDCl<sub>3</sub>) δ 8.28 (d, *J* = 1.0 Hz, 1H), 8.15

(d,  $J = 1.9$  Hz, 2H), 8.12 (dd,  $J = 8.4, 1.5$  Hz, 1H), 7.82 – 7.78 (m, 1H), 7.54 (t,  $J = 1.9$  Hz, 1H), 3.98 (s, 3H) ppm.  $^{13}\text{C}$  NMR (100 MHz,  $\text{CDCl}_3$ )  $\delta$  166.5, 162.9, 150.5, 145.6, 136.0, 132.0, 129.4, 128.0, 126.8, 126.2, 120.1, 112.6, 52.6 ppm. HRMS (ESI,  $m/z$ ) calcd for  $\text{C}_{15}\text{H}_{10}\text{Cl}_2\text{NO}_3$   $[\text{M}+\text{H}]^+$ : 322.00323, found: 322.00281.

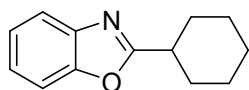

**2r**

**2-Cyclohexylbenzo[d]oxazole (2r):** The product was isolated as a white solid (19 mg, 94%). mp 156-158 °C;  $^1\text{H}$  NMR (400 MHz,  $\text{CDCl}_3$ )  $\delta$  7.72 – 7.65 (m, 1H), 7.47 (dt,  $J = 7.6, 3.4$  Hz, 1H), 7.31 – 7.27 (m, 2H), 2.96 (tt,  $J = 11.4, 3.6$  Hz, 1H), 2.22 – 2.14 (m, 2H), 1.93 – 1.82 (m, 2H), 1.71 (ddd,  $J = 24.4, 12.2, 3.4$  Hz, 3H), 1.50 – 1.29 (m, 3H) ppm.  $^{13}\text{C}$  NMR (100 MHz,  $\text{CDCl}_3$ )  $\delta$  170.6, 150.7, 141.3, 124.5, 124.1, 119.7, 110.4, 38.0, 30.6, 25.9, 25.8 ppm. HRMS (ESI,  $m/z$ ) calcd for  $\text{C}_{13}\text{H}_{16}\text{NO}$   $[\text{M}+\text{H}]^+$ : 202.12264, found: 202.12244.

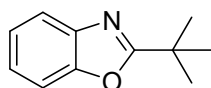

**2s**

**2-(tert-Butyl)benzo[d]oxazole (2s):** The product was isolated as a white solid (17 mg, 95%). mp 220-223 °C;  $^1\text{H}$  NMR (400 MHz,  $\text{CDCl}_3$ )  $\delta$  7.70 (dd,  $J = 5.9, 3.2$  Hz, 1H), 7.49 (dd,  $J = 5.9, 3.2$  Hz, 1H), 7.30 (dd,  $J = 6.0, 3.2$  Hz, 2H), 1.50 (s, 9H) ppm.  $^{13}\text{C}$  NMR (100 MHz,  $\text{CDCl}_3$ )  $\delta$  150.9, 141.3, 124.6, 124.1, 119.8, 110.4, 34.3, 28.6 ppm. HRMS (ESI,  $m/z$ ) calcd for  $\text{C}_{11}\text{H}_{13}\text{NO}$   $[\text{M}+\text{H}]^+$ : 176.1070, found: 176.1069.

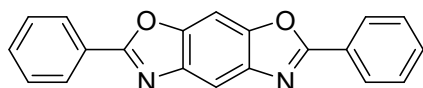

**4a**

**2,6-Diphenylbenzo[1,2-d:5,4-d']bis(oxazole) (4a):** The product was isolated as a white solid (23 mg, 73%). mp 180 °C;  $^1\text{H}$  NMR (400 MHz,  $\text{CDCl}_3$ )  $\delta$  8.28 (s, 4H), 8.12 (s, 1H), 7.80 (s, 1H), 7.56 (s, 6H) ppm.  $^{13}\text{C}$  NMR (100 MHz,  $\text{CDCl}_3$ )  $\delta$  164.0, 140.0, 131.8, 129.2, 127.8, 127.1, 110.0, 93.5 ppm. HRMS (ESI,  $m/z$ ) calcd for  $\text{C}_{20}\text{H}_{13}\text{N}_2\text{O}_2$   $[\text{M}+\text{H}]^+$ : 313.09715, found: 313.09692.

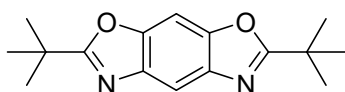

**4b**

**2,6-di-tert-Butylbenzo[1,2-d:5,4-d']bis(oxazole) (4b):** The product was isolated as a white solid (18 mg, 66%). mp 132-133 °C;  $^1\text{H}$  NMR (400 MHz,  $\text{CDCl}_3$ )  $\delta$  7.96 (s, 1H), 7.58 (s, 1H), 1.51 (s, 18H) ppm.  $^{13}\text{C}$  NMR (100 MHz,  $\text{CDCl}_3$ )  $\delta$  174.2, 148.5, 138.6, 109.5, 92.9, 34.5, 28.6 ppm. HRMS (ESI,  $m/z$ ) calcd for  $\text{C}_{16}\text{H}_{21}\text{N}_2\text{O}_2$   $[\text{M}+\text{H}]^+$ : 273.15975, found: 273.15930.

## 1 mmol scale reaction

To iodonium **1d** (617.3 mg, 1 mmol) in a flask was added  $\text{Na}_2\text{CO}_3$  (158.98 mg, 1.5 equiv.),  $\text{Ni}(\text{OTf})_2$  (17.84 mg, 5 mol%), DMSO (5 mL). The reaction flask was evacuated and backfilled with argon three times, the reaction mixture was stirred at 80 °C heated by an oil bath for 6h. The reaction was monitored

by TLC. After the reaction was finished, the residue was dissolved in EtOAc, washed with H<sub>2</sub>O and brine, dried over anhydrous Na<sub>2</sub>SO<sub>4</sub>, and then evaporated under vacuum. The residue was purified by column chromatography on silica gel to provide **2d** in 65% yield (170.45 mg).

**General procedure for nickel/Palladium catalyzed synthesis benzoxazole derivatives 6:**

To iodonium **1** (55 mg, 0.1 mmol) in a flask was added Na<sub>2</sub>CO<sub>3</sub> (16 mg, 1.5 equiv.), Ni(OTf)<sub>2</sub> (1.8 mg, 5 mol%), DMSO (1.0 mL). The reaction flask was evacuated and backfilled with argon three times, the reaction mixture was stirred at 80 °C heated by an oil bath for 6h. The reaction was monitored by TLC. After the reaction was finished, to the reaction mixture was added PdCl<sub>2</sub> (5 mol%), AgOAc (2.0 equiv.), K<sub>3</sub>PO<sub>4</sub> (2.0 equiv.), TFA (1.0 mL), the reaction mixture was stirred at 80 °C heated by an oil bath for 24h. The reaction was monitored by TLC. After the reaction was finished, the residue was dissolved in EtOAc, washed with H<sub>2</sub>O and brine, and dried over anhydrous Na<sub>2</sub>SO<sub>4</sub>, then evaporated under vacuum. The residue was purified by column chromatography on silica gel (PE/EA = 1/50-1/10) to provide **6**.

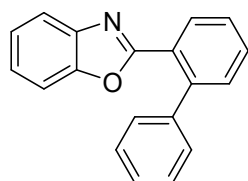

**6a**

**2-([1,1'-Diphenyl]-2-yl)benzo[d]oxazole (6a):** The product was isolated as a white solid (21 mg, 77%). mp 87 °C; <sup>1</sup>H NMR (400 MHz, CDCl<sub>3</sub>) δ 8.15 – 8.09 (m, 1H), 7.72 (dd, *J* = 7.5, 1.1 Hz, 1H), 7.59 (td, *J* = 7.5, 1.4 Hz, 1H), 7.51 (ddd, *J* = 8.3, 5.5, 1.4 Hz, 2H), 7.35 – 7.25 (m, 8H) ppm. <sup>13</sup>C NMR (100 MHz, CDCl<sub>3</sub>) δ 164.0, 150.8, 142.6, 141.8, 141.1, 131.3, 131.1, 128.9, 128.2, 127.7, 127.4, 126.4, 125.0, 124.4, 120.2, 110.6 ppm. HRMS (ESI, *m/z*) calcd for C<sub>19</sub>H<sub>14</sub>NO [M+H]<sup>+</sup>: 272.10699, found: 272.10657.

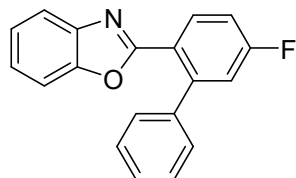

**6b**

**2-(5-Fluoro-[1,1'-biphenyl]-2-yl)benzo[d]oxazole (6b):** The product was isolated as a white solid (19 mg, 64%). mp 82-85 °C; <sup>1</sup>H NMR (400 MHz, CDCl<sub>3</sub>) δ 8.16 – 8.08 (m, 1H), 7.71 (d, *J* = 7.6 Hz, 1H), 7.38 – 7.25 (m, 8H), 7.24 – 7.17 (m, 2H) ppm. <sup>13</sup>C NMR (100 MHz, CDCl<sub>3</sub>) δ 164.1 (d, *J*<sub>C-F</sub> = 251.0 Hz), 162.8, 150.8, 145.1, 141.7, 140.0, 133.4 (d, *J*<sub>C-F</sub> = 9.0 Hz), 128.7, 128.4, 127.9, 125.1, 124.5, 122.7 (d, *J*<sub>C-F</sub> = 3.0 Hz), 120.2, 118.3, 115.0 (d, *J*<sub>C-F</sub> = 21.0 Hz), 110.6 ppm. HRMS (ESI, *m/z*) calcd for C<sub>19</sub>H<sub>13</sub>NOF [M+H]<sup>+</sup>: 290.09757, found: 290.09720.

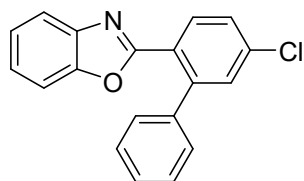

**6c**

**2-(5-Chloro-[1,1'-biphenyl]-2-yl)benzo[d]oxazole (6c):** The product was isolated as a white solid (22 mg, 71%). mp 79-82 °C; <sup>1</sup>H NMR (400 MHz, CDCl<sub>3</sub>) δ 8.12 – 8.06 (m, 1H), 7.71 (dd, *J* = 7.4, 1.3

Hz, 1H), 7.53 – 7.46 (m, 2H), 7.39 – 7.24 (m, 8H) ppm.  $^{13}\text{C}$  NMR (100 MHz,  $\text{CDCl}_3$ )  $\delta$  163.0, 150.8, 144.1, 141.6, 139.8, 137.2, 132.4, 131.4, 128.8, 128.4, 127.9, 127.9, 125.3, 124.8, 124.6, 120.2, 110.7 ppm. HRMS (ESI,  $m/z$ ) calcd for  $\text{C}_{19}\text{H}_{13}\text{NOCl}$   $[\text{M}+\text{H}]^+$ : 306.06802, found: 306.06775.

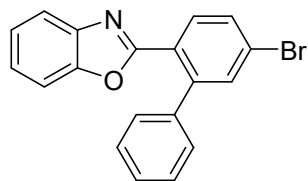

**6d**

**2-(5-Bromo-[1,1'-biphenyl]-2-yl)benzo[d]oxazole (6d):** The product was isolated as a white solid (20 mg, 57%). mp 104-107 °C;  $^1\text{H}$  NMR (400 MHz,  $\text{CDCl}_3$ )  $\delta$  8.01 (dd,  $J = 7.5, 1.4$  Hz, 1H), 7.74 – 7.69 (m, 1H), 7.65 (dd,  $J = 7.7, 1.7$  Hz, 2H), 7.38 – 7.24 (m, 8H) ppm.  $^{13}\text{C}$  NMR (100 MHz,  $\text{CDCl}_3$ )  $\delta$  163.0, 150.8, 144.3, 141.7, 139.8, 134.3, 132.4, 130.8, 128.8, 128.4, 127.9, 125.6, 125.3, 124.6, 120.3, 120.3, 110.7 ppm. HRMS (ESI,  $m/z$ ) calcd for  $\text{C}_{19}\text{H}_{13}\text{NOBr}$   $[\text{M}+\text{H}]^+$ : 350.01750, found: 350.01721.

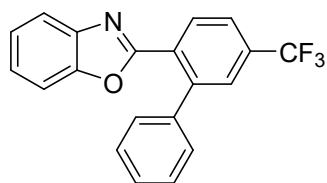

**6e**

**2-(5-(Trifluoromethyl)-[1,1'-biphenyl]-2-yl)benzo[d]oxazole (6e):** The product was isolated as a white solid (18 mg, 55%). mp 85-87 °C;  $^1\text{H}$  NMR (400 MHz,  $\text{CDCl}_3$ )  $\delta$  8.27 (d,  $J = 7.9$  Hz, 1H), 7.75 (t,  $J = 9.3$  Hz, 3H), 7.42 – 7.27 (m, 8H) ppm.  $^{13}\text{C}$  NMR (100 MHz,  $\text{CDCl}_3$ )  $\delta$  162.5, 150.9, 143.3, 141.6, 139.8, 132.8 (q,  $J_{\text{C-F}} = 33.0$  Hz), 131.6, 129.6, 128.8, 128.5, 128.2 (q,  $J_{\text{C-F}} = 3.0$  Hz), 128.1, 125.6, 124.8, 124.4 (q,  $J_{\text{C-F}} = 3.0$  Hz), 124.4, 120.5, 110.8 ppm. HRMS (ESI,  $m/z$ ) calcd for  $\text{C}_{20}\text{H}_{13}\text{NOF}_3$   $[\text{M}+\text{H}]^+$ : 340.09438, found: 340.09399.

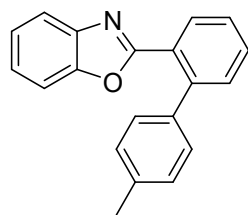

**6f**

**2-(4'-Methyl-[1,1'-biphenyl]-2-yl)benzo[d]oxazole (6f):** The product was isolated as a white solid (19 mg, 68%). mp 96-97 °C;  $^1\text{H}$  NMR (400 MHz,  $\text{CDCl}_3$ )  $\delta$  8.08 – 8.00 (m, 1H), 7.73 – 7.65 (m, 1H), 7.56 – 7.49 (m, 1H), 7.44 (ddd,  $J = 5.1, 3.8, 1.9$  Hz, 2H), 7.30 – 7.19 (m, 3H), 7.14 (d,  $J = 8.1$  Hz, 2H), 7.08 (d,  $J = 8.0$  Hz, 2H), 2.32 (s, 3H) ppm.  $^{13}\text{C}$  NMR (100 MHz,  $\text{CDCl}_3$ )  $\delta$  164.2, 150.8, 142.6, 141.7, 138.0, 137.1, 131.3, 131.2, 131.2, 129.0, 128.8, 127.4, 126.3, 125.0, 124.4, 120.2, 110.7, 21.3 ppm. HRMS (ESI,  $m/z$ ) calcd for  $\text{C}_{20}\text{H}_{16}\text{NO}$   $[\text{M}+\text{H}]^+$ : 286.12264, found: 286.12225.



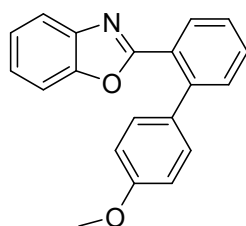

**6g**

**2-(4'-Methoxy-[1,1'-biphenyl]-2-yl)benzo[d]oxazole (6g):** The product was isolated as a white solid (22 mg, 73%). mp 102-105 °C; <sup>1</sup>H NMR (400 MHz, CDCl<sub>3</sub>) δ 8.07 (d, *J* = 7.5 Hz, 1H), 7.73 (d, *J* = 7.3 Hz, 1H), 7.56 (t, *J* = 7.4 Hz, 1H), 7.46 (dd, *J* = 13.0, 6.1 Hz, 2H), 7.29 (ddd, *J* = 15.5, 8.0, 3.4 Hz, 3H), 7.21 (d, *J* = 8.6 Hz, 2H), 6.86 (d, *J* = 8.6 Hz, 2H), 3.81 (s, 3H) ppm. <sup>13</sup>C NMR (100 MHz, CDCl<sub>3</sub>) δ 164.2, 159.1, 150.9, 142.2, 141.8, 133.4, 131.2, 131.2, 131.1, 130.1, 127.3, 126.4, 125.0, 124.4, 120.2, 113.8, 110.7, 55.4 ppm. HRMS (ESI, *m/z*) calcd for C<sub>20</sub>H<sub>16</sub>NO<sub>2</sub> [M+H]<sup>+</sup>: 302.11756, found: 302.11716.

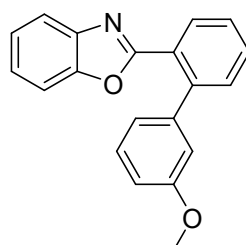

**6h**

**2-(3'-Methoxy-[1,1'-biphenyl]-2-yl)benzo[d]oxazole (6h):** The product was isolated as a white solid (20 mg, 68%). mp 84-86 °C; <sup>1</sup>H NMR (400 MHz, CDCl<sub>3</sub>) δ 8.08 (dd, *J* = 5.4, 3.0 Hz, 1H), 7.79 – 7.71 (m, 1H), 7.64 – 7.57 (m, 1H), 7.52 (ddd, *J* = 4.6, 3.8, 2.2 Hz, 2H), 7.37 – 7.27 (m, 3H), 7.25 – 7.19 (m, 1H), 6.91 – 6.80 (m, 3H), 3.68 (s, 3H) ppm. <sup>13</sup>C NMR (100 MHz, CDCl<sub>3</sub>) δ 164.0, 159.5, 150.9, 142.4, 141.8, 131.1, 129.2, 127.7, 126.4, 125.1, 124.4, 121.5, 120.2, 114.2, 113.4, 110.7, 55.3 ppm. HRMS (ESI, *m/z*) calcd for C<sub>20</sub>H<sub>16</sub>NO<sub>2</sub> [M+H]<sup>+</sup>: 302.11756, found: 302.11713.

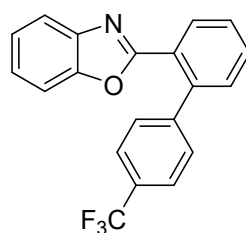

**6i**

**2-(4'-(Trifluoromethyl)-[1,1'-biphenyl]-2-yl)benzo[d]oxazole (6i):** The product was isolated as a white solid (16 mg, 46%). mp 83 °C; <sup>1</sup>H NMR (400 MHz, CDCl<sub>3</sub>) δ 8.22 – 8.14 (m, 1H), 7.71 (d, *J* = 6.9 Hz, 1H), 7.65 – 7.55 (m, 4H), 7.50 – 7.44 (m, 1H), 7.42 (d, *J* = 8.0 Hz, 2H), 7.36 – 7.27 (m, 3H) ppm. <sup>13</sup>C NMR (100 MHz, CDCl<sub>3</sub>) δ 163.2, 150.8, 144.9, 141.7, 141.1, 131.3, 131.2, 131.1, 129.4, 128.4, 126.8 (q, *J*<sub>C-F</sub> = 269.0 Hz), 126.3, 125.4, 125.2 (q, *J*<sub>C-F</sub> = 3.0 Hz), 124.7, 123.1, 110.7 ppm. HRMS (ESI, *m/z*) calcd for C<sub>20</sub>H<sub>13</sub>NOF<sub>3</sub> [M+H]<sup>+</sup>: 340.09438, found: 340.09406.

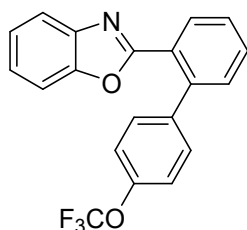

**6j**

**2-(4'-(Trifluoromethoxy)-[1,1'-biphenyl]-2-yl)benzo[d]oxazole (6j):** The product was isolated as a white solid (18 mg, 51%). mp 57-60 °C; <sup>1</sup>H NMR (400 MHz, CDCl<sub>3</sub>) δ 8.22 – 8.13 (m, 1H), 7.71 (d, *J* = 7.0 Hz, 1H), 7.60 (dt, *J* = 7.5, 3.8 Hz, 1H), 7.57 – 7.51 (m, 1H), 7.50 – 7.44 (m, 1H), 7.35 – 7.26 (m, 5H), 7.19 (d, *J* = 8.2 Hz, 2H) ppm. <sup>13</sup>C NMR (100 MHz, CDCl<sub>3</sub>) δ 163.4, 150.8, 148.7, 141.7, 141.1, 140.0, 131.2, 131.2, 131.1, 130.4, 128.2, 126.4, 125.3, 124.6, 120.7, 120.3, 110.6 ppm. HRMS (ESI, *m/z*) calcd for C<sub>20</sub>H<sub>13</sub>NO<sub>2</sub>F<sub>3</sub> [M+H]<sup>+</sup>: 356.08929, found: 356.08875.

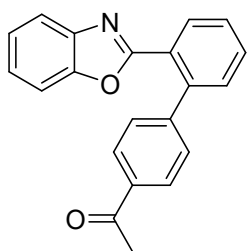

**6k**

**1-(2'-(Benzo[d]oxazol-2-yl)-[1,1'-biphenyl]-4-yl)ethan-1-one (6k):** The product was isolated as a white solid (17 mg, 54%). mp 149 °C; <sup>1</sup>H NMR (400 MHz, CDCl<sub>3</sub>) δ 8.15 (d, *J* = 7.4 Hz, 1H), 7.93 (d, *J* = 8.2 Hz, 2H), 7.70 (d, *J* = 7.2 Hz, 1H), 7.64 – 7.58 (m, 1H), 7.56 (t, *J* = 7.0 Hz, 1H), 7.48 (d, *J* = 8.3 Hz, 1H), 7.40 (t, *J* = 6.7 Hz, 2H), 7.34 – 7.25 (m, 3H), 2.62 (s, 3H) ppm. <sup>13</sup>C NMR (100 MHz, CDCl<sub>3</sub>) δ 198.0, 163.3, 150.8, 146.1, 141.7, 141.3, 136.0, 131.2, 131.2, 131.1, 129.3, 128.4, 126.3, 125.3, 124.6, 120.3, 110.7, 26.8 ppm. HRMS (ESI, *m/z*) calcd for C<sub>21</sub>H<sub>16</sub>NO<sub>2</sub> [M+H]<sup>+</sup>: 314.11756, found: 314.11697.

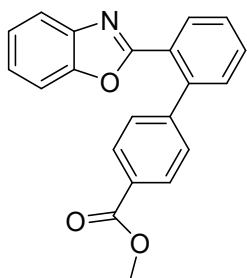

**6l**

**Methyl 2'-(benzo[d]oxazol-2-yl)-[1,1'-biphenyl]-4-carboxylate (6l):** The product was isolated as a white solid (17 mg, 51%). mp 165-167 °C; <sup>1</sup>H NMR (400 MHz, CDCl<sub>3</sub>) δ 8.16 (d, *J* = 7.5 Hz, 1H), 8.01 (d, *J* = 8.2 Hz, 2H), 7.70 (d, *J* = 7.4 Hz, 1H), 7.63 – 7.59 (m, 1H), 7.56 (dd, *J* = 10.7, 4.3 Hz, 1H), 7.48 (d, *J* = 7.5 Hz, 1H), 7.37 (d, *J* = 8.2 Hz, 2H), 7.34 – 7.24 (m, 3H), 3.93 (s, 3H) ppm. <sup>13</sup>C NMR (100 MHz, CDCl<sub>3</sub>) δ 167.2, 163.4, 150.8, 145.9, 141.7, 141.4, 131.2, 131.2, 129.6, 129.1, 128.3, 126.3, 125.2, 124.6, 120.3, 110.7, 52.3 ppm. HRMS (ESI, *m/z*) calcd for C<sub>21</sub>H<sub>16</sub>NO<sub>3</sub> [M+H]<sup>+</sup>: 330.11247, found: 330.11182.

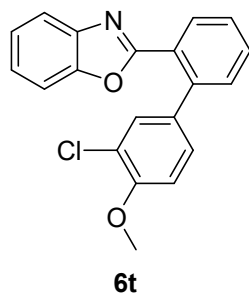

**2-(3'-chloro-4'-methoxy-[1,1'-biphenyl]-2-yl)benzo[d]oxazole(6t):** The product was isolated as a white solid (18 mg, 53%); mp 89-91 °C;  $^1\text{H NMR}$  (400 MHz,  $\text{CDCl}_3$ )  $\delta$  8.11 (dd,  $J = 7.7, 1.3$  Hz, 1H), 7.76 – 7.69 (m, 1H), 7.60 – 7.54 (m, 1H), 7.53 – 7.47 (m, 1H), 7.45 (dd,  $J = 7.6, 1.1$  Hz, 1H), 7.41 (d,  $J = 2.2$  Hz, 1H), 7.37 – 7.27 (m, 3H), 7.08 (dd,  $J = 8.5, 2.2$  Hz, 1H), 6.85 (d,  $J = 8.5$  Hz, 1H), 3.91 (s, 3H) ppm.  $^{13}\text{C NMR}$  (101 MHz,  $\text{CDCl}_3$ )  $\delta$  163.7, 154.5, 150.8, 141.8, 140.8, 134.4, 131.3, 131.2, 130.7, 128.5, 127.8, 126.3, 125.2, 124.5, 122.2, 120.3, 111.7, 110.7, 56.3 ppm. HRMS (ESI,  $m/z$ ) calcd for  $\text{C}_{20}\text{H}_{15}\text{NO}_2\text{Cl}$   $[\text{M}+\text{H}]^+$ : 336.07858, found: 336.07797.

Synthesis of diaryliodoniums was done according to reported work.<sup>[1]</sup>

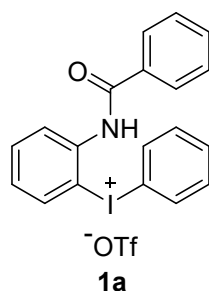

**(2-benzamidophenyl)(phenyl)iodonium trifluoromethanesulfonate (1a):**

$^1\text{H NMR}$  (400 MHz, DMSO)  $\delta$  11.12 (s, 1H), 8.22 (dd,  $J = 8.3, 1.0$  Hz, 2H), 8.12 – 8.03 (m, 3H), 7.71 (qd,  $J = 7.3, 1.3$  Hz, 3H), 7.67 – 7.59 (m, 3H), 7.58 – 7.53 (m, 2H), 7.40 – 7.34 (m, 1H) ppm.  $^{13}\text{C NMR}$  (100 MHz, DMSO)  $\delta$  167.6, 138.4, 135.7, 133.0, 132.9, 132.8, 132.4, 131.8, 129.3, 128.8, 128.1, 127.8, 116.9, 114.3 ppm. HRMS (ESI,  $m/z$ ) calcd for  $\text{C}_{19}\text{H}_{15}\text{NOI}$   $[\text{M}-\text{OTf}]^+$ : 400.01928, found: 400.01892.

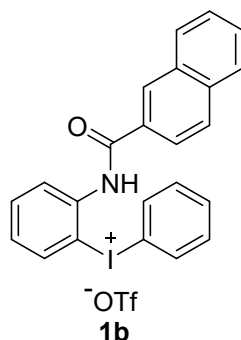

**(2-(2-naphthamido)phenyl)(phenyl)iodonium trifluoromethanesulfonate (1b)**

$^1\text{H NMR}$  (500 MHz, DMSO)  $\delta$  11.31 (s, 1H), 8.72 (s, 1H), 8.24 (d,  $J = 7.9$  Hz, 2H), 8.16 (t,  $J = 6.6$  Hz, 2H), 8.10 (dd,  $J = 13.8, 6.9$  Hz, 3H), 7.76 – 7.67 (m, 4H), 7.65 (d,  $J = 7.2$  Hz, 1H), 7.57 (t,  $J = 7.8$  Hz, 2H), 7.38 (dd,  $J = 13.5, 6.2$  Hz, 1H) ppm.  $^{13}\text{C NMR}$  (100 MHz, DMSO)  $\delta$  167.6, 138.4, 135.7, 134.8, 133.0, 132.4, 132.0, 131.8, 130.0, 129.2, 129.2, 129.1, 128.6, 128.5, 127.9, 127.8, 127.3, 124.2, 122.0,

116.9, 114.2 ppm. HRMS (ESI,  $m/z$ ) calcd for  $C_{23}H_{17}NOI$  [M-OTf]<sup>+</sup>: 450.03493, found: 450.03452.

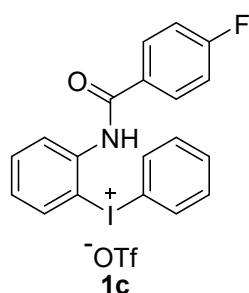

**(2-(4-fluorobenzamido)phenyl)(phenyl)iodonium trifluoromethanesulfonate (1c)**

<sup>1</sup>H NMR (400 MHz, DMSO)  $\delta$  11.11 (s, 1H), 8.20 (d,  $J = 7.6$  Hz, 2H), 8.14 (dd,  $J = 8.8, 5.5$  Hz, 2H), 8.09 (d,  $J = 8.1$  Hz, 1H), 7.70 (td,  $J = 7.1, 3.5$  Hz, 2H), 7.62 – 7.52 (m, 3H), 7.48 (t,  $J = 8.8$  Hz, 2H), 7.41 – 7.33 (m, 1H) ppm. <sup>13</sup>C NMR (100 MHz, DMSO)  $\delta$  166.6, 166.5 (d,  $J_{C-F} = 250.0$  Hz), 138.4, 135.9, 135.8, 133.2, 132.6, 132.0, 131.1 (d,  $J_{C-F} = 10.0$  Hz), 129.5, 128.0, 122.4, 119.2, 116.9, 116.0 (d,  $J_{C-F} = 22.0$  Hz), 114.5 ppm. HRMS (ESI,  $m/z$ ) calcd for  $C_{19}H_{14}NOFI$  [M-OTf]<sup>+</sup>: 418.00986, found: 418.00955.

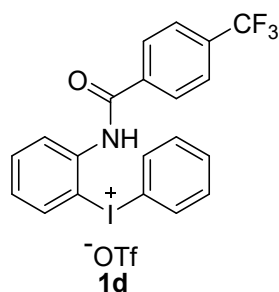

**phenyl(2-(4-(trifluoromethyl)benzamido)phenyl)iodonium trifluoromethanesulfonate (1d)**

<sup>1</sup>H NMR (400 MHz, DMSO)  $\delta$  11.21 (s, 1H), 8.27 – 8.15 (m, 5H), 8.03 (d,  $J = 8.3$  Hz, 2H), 7.75 – 7.67 (m, 2H), 7.62 (dd,  $J = 7.9, 1.3$  Hz, 1H), 7.55 (t,  $J = 7.8$  Hz, 2H), 7.44 – 7.38 (m, 1H) ppm. <sup>13</sup>C NMR (100 MHz, DMSO)  $\delta$  166.1, 138.2, 136.9, 136.2, 135.6, 133.1, 132.4, 132.3, 132.1, 131.8, 129.6, 129.0, 128.3, 125.8 (q,  $J_{C-F} = 3.0$  Hz), 123.9 (q,  $J_{C-F} = 3.0$  Hz), 116.7, 114.8 ppm. HRMS (ESI,  $m/z$ ) calcd for  $C_{20}H_{14}F_3NOI$  [M-OTf]<sup>+</sup>: 468.00667, found: 468.00644.

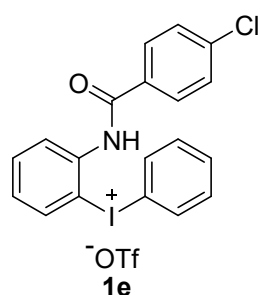

**(2-(4-chlorobenzamido)phenyl)(phenyl)iodonium trifluoromethanesulfonate (1e)**

<sup>1</sup>H NMR (400 MHz, DMSO)  $\delta$  11.12 (s, 1H), 8.20 (d,  $J = 7.7$  Hz, 2H), 8.12 (d,  $J = 8.2$  Hz, 1H), 8.08 (d,  $J = 8.5$  Hz, 2H), 7.71 (dd,  $J = 15.3, 8.0$  Hz, 4H), 7.60 (dd,  $J = 7.9, 1.1$  Hz, 1H), 7.55 (t,  $J = 7.8$  Hz, 2H), 7.41 – 7.35 (m, 1H) ppm. <sup>13</sup>C NMR (100 MHz, DMSO)  $\delta$  166.4, 138.3, 137.7, 136.0, 135.7, 133.1, 132.4, 131.8, 131.6, 130.1, 129.4, 128.9, 128.0, 116.8, 114.6 ppm. HRMS (ESI,  $m/z$ ) calcd for  $C_{19}H_{14}NOI$  [M-OTf]<sup>+</sup>: 400.01928, found: 400.01892. HRMS (ESI,  $m/z$ ) calcd for  $C_{19}H_{14}NOClI$  [M-OTf]<sup>+</sup>: 433.98031, found: 433.97998.

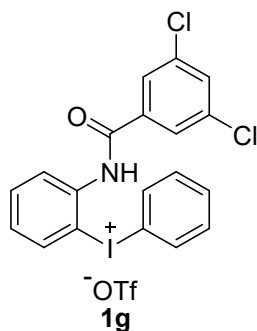

**(2-(3,5-dichlorobenzamido)phenyl)(phenyl)iodonium trifluoromethanesulfonate (1g)**

$^1\text{H}$  NMR (400 MHz, DMSO)  $\delta$  11.16 (s, 1H), 8.23 – 8.14 (m, 3H), 8.06 – 7.94 (m, 3H), 7.75 – 7.66 (m, 2H), 7.61 – 7.57 (m, 1H), 7.54 (t,  $J$  = 7.8 Hz, 2H), 7.44 – 7.38 (m, 1H) ppm.  $^{13}\text{C}$  NMR (100 MHz, DMSO)  $\delta$  164.7, 138.0, 136.5, 136.4, 135.6, 134.7, 133.3, 132.4, 132.0, 131.9, 129.8, 128.4, 127.0, 116.8, 114.8 ppm. HRMS (ESI,  $m/z$ ) calcd for  $\text{C}_{19}\text{H}_{13}\text{NOCl}_2$  [M-OTf] $^+$ : 467.94134, found: 467.94128.

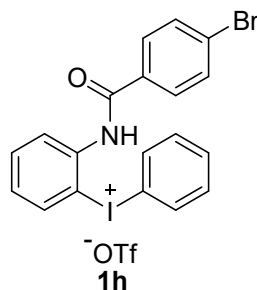

**(2-(4-bromobenzamido)phenyl)(phenyl)iodonium trifluoromethanesulfonate (1h)**

$^1\text{H}$  NMR (400 MHz, DMSO)  $\delta$  11.12 (s, 1H), 8.20 (d,  $J$  = 7.8 Hz, 2H), 8.12 (d,  $J$  = 8.1 Hz, 1H), 8.00 (d,  $J$  = 8.5 Hz, 2H), 7.87 (d,  $J$  = 8.5 Hz, 2H), 7.70 (t,  $J$  = 7.5 Hz, 2H), 7.62 – 7.58 (m, 1H), 7.54 (t,  $J$  = 7.8 Hz, 2H), 7.42 – 7.34 (m, 1H) ppm.  $^{13}\text{C}$  NMR (100 MHz, DMSO)  $\delta$  166.6, 138.3, 136.0, 135.7, 133.1, 132.4, 132.0, 131.9, 131.9, 130.2, 129.4, 128.0, 126.7, 116.8, 114.6 ppm. HRMS (ESI,  $m/z$ ) calcd for  $\text{C}_{19}\text{H}_{14}\text{NOBr}$  [M-OTf] $^+$ : 477.92980, found: 477.92963.

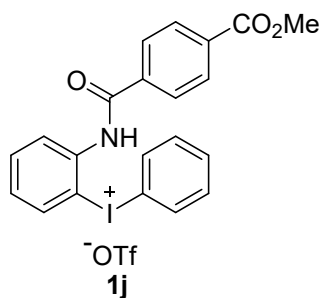

**(2-(4-(methoxycarbonyl)benzamido)phenyl)(phenyl)iodonium trifluoromethanesulfonate (1j)**

$^1\text{H}$  NMR (400 MHz, DMSO)  $\delta$  11.23 (s, 1H), 8.24 – 8.11 (m, 7H), 7.71 (ddd,  $J$  = 12.1, 5.0, 2.4 Hz, 2H), 7.61 (dd,  $J$  = 8.0, 1.4 Hz, 1H), 7.54 (dd,  $J$  = 10.8, 4.8 Hz, 2H), 7.43 – 7.37 (m, 1H), 3.93 (s, 3H) ppm.  $^{13}\text{C}$  NMR (100 MHz, DMSO)  $\delta$  166.5, 165.7, 138.2, 137.0, 136.1, 135.6, 133.1, 133.0, 132.4, 131.8, 129.5, 128.5, 128.2, 116.8, 114.7, 52.6 ppm. HRMS (ESI,  $m/z$ ) calcd for  $\text{C}_{21}\text{H}_{17}\text{NO}_3$  [M-OTf] $^+$ : 458.02476, found: 458.02426.

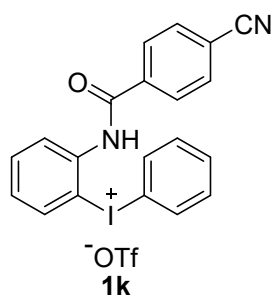

**(2-(4-cyanobenzamido)phenyl)(phenyl)iodonium trifluoromethanesulfonate (1k)**

$^1\text{H}$  NMR (400 MHz, DMSO)  $\delta$  11.22 (s, 1H), 8.15 (dd,  $J$  = 19.8, 8.4 Hz, 7H), 7.71 (dd,  $J$  = 16.5, 8.3 Hz, 2H), 7.61 (d,  $J$  = 6.9 Hz, 1H), 7.57 – 7.51 (m, 2H), 7.41 (dd,  $J$  = 11.2, 4.3 Hz, 1H) ppm.  $^{13}\text{C}$  NMR (100 MHz, DMSO)  $\delta$  166.2, 138.2, 137.2, 136.5, 135.7, 133.4, 133.0, 132.6, 132.0, 130.9, 129.9, 129.1, 128.5, 128.2, 118.4, 116.9, 115.0 ppm. HRMS (ESI,  $m/z$ ) calcd for  $\text{C}_{20}\text{H}_{14}\text{N}_2\text{OI}$   $[\text{M}-\text{OTf}]^+$ : 425.01453, found: 425.01389.

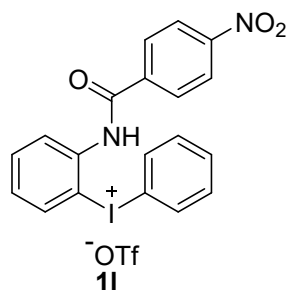

**(2-(4-nitrobenzamido)phenyl)(phenyl)iodonium trifluoromethanesulfonate (1l)**

$^1\text{H}$  NMR (400 MHz, DMSO)  $\delta$  11.27 (s, 1H), 8.48 (d,  $J$  = 8.8 Hz, 2H), 8.26 (d,  $J$  = 8.8 Hz, 2H), 8.22 – 8.14 (m, 3H), 7.76 – 7.66 (m, 2H), 7.63 (dd,  $J$  = 7.9, 1.3 Hz, 1H), 7.54 (t,  $J$  = 7.8 Hz, 2H), 7.45 – 7.38 (m, 1H) ppm.  $^{13}\text{C}$  NMR (100 MHz, DMSO)  $\delta$  165.6, 149.8, 138.7, 138.1, 136.4, 135.5, 133.2, 132.3, 131.8, 129.7, 129.6, 128.4, 123.9, 116.7, 115.0 ppm. HRMS (ESI,  $m/z$ ) calcd for  $\text{C}_{19}\text{H}_{14}\text{N}_2\text{O}_3\text{I}$   $[\text{M}-\text{OTf}]^+$ : 445.00436, found: 445.00409.

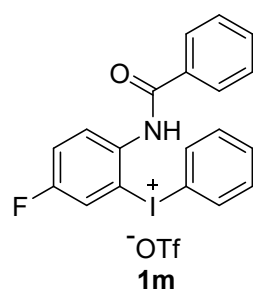

**(2-benzamido-5-fluorophenyl)(phenyl)iodonium trifluoromethanesulfonate (1m)**

$^1\text{H}$  NMR (400 MHz, DMSO)  $\delta$  11.01 (s, 1H), 8.23 (dd,  $J$  = 8.3, 1.0 Hz, 2H), 8.12 (dd,  $J$  = 7.7, 2.6 Hz, 1H), 8.08 – 8.03 (m, 2H), 7.72 (ddd,  $J$  = 5.6, 4.9, 2.6 Hz, 2H), 7.65 (dt,  $J$  = 8.2, 6.3 Hz, 4H), 7.60 – 7.54 (m, 2H) ppm.  $^{13}\text{C}$  NMR (100 MHz, DMSO)  $\delta$  167.4, 159.8 (d,  $J_{\text{C-F}}$  = 248.0 Hz), 135.6, 135.3, 132.8, 132.5, 131.9, 129.4 (d,  $J_{\text{C-F}}$  = 8.0 Hz), 128.8, 128.1, 122.8, 122.5, 120.2 (d,  $J_{\text{C-F}}$  = 22.0 Hz), 117.1, 114.9, 114.9 ppm. HRMS (ESI,  $m/z$ ) calcd for  $\text{C}_{19}\text{H}_{14}\text{NOFI}$   $[\text{M}-\text{OTf}]^+$ : 418.00986, found: 418.00937.

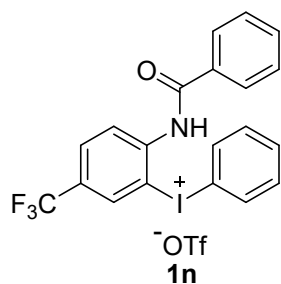

**(2-benzamido-5-(trifluoromethyl)phenyl)(phenyl)iodonium trifluoromethanesulfonate (1n)**

$^1\text{H}$  NMR (400 MHz, DMSO)  $\delta$  11.30 (s, 1H), 8.51 (s, 1H), 8.25 (d,  $J = 8.0$  Hz, 2H), 8.08 (t,  $J = 9.1$  Hz, 3H), 7.81 (d,  $J = 8.4$  Hz, 1H), 7.73 (q,  $J = 7.4$  Hz, 2H), 7.65 (t,  $J = 7.6$  Hz, 2H), 7.57 (t,  $J = 7.8$  Hz, 2H) ppm.  $^{13}\text{C}$  NMR (100 MHz, DMSO)  $\delta$  167.5, 142.4, 135.7, 133.1, 132.6, 132.5, 131.9, 129.9 (q,  $J_{\text{C-F}} = 3.0$  Hz), 128.9, 128.5, 128.2, 128.1, 122.9 (q,  $J_{\text{C-F}} = 272.0$  Hz), 117.4, 114.1 ppm. HRMS (ESI,  $m/z$ ) calcd for  $\text{C}_{20}\text{H}_{14}\text{NOF}_3\text{I}$   $[\text{M-OTf}]^+$ : 468.00667, found: 468.00632.

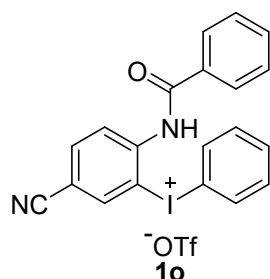

**(2-benzamido-5-cyanophenyl)(phenyl)iodonium trifluoromethanesulfonate (1o)**

$^1\text{H}$  NMR (400 MHz, DMSO)  $\delta$  11.31 (s, 1H), 8.68 (d,  $J = 1.7$  Hz, 1H), 8.25 (d,  $J = 7.5$  Hz, 2H), 8.17 (dd,  $J = 8.4, 1.8$  Hz, 1H), 8.09 – 8.02 (m, 2H), 7.78 (d,  $J = 8.4$  Hz, 1H), 7.76 – 7.70 (m, 2H), 7.65 (t,  $J = 7.5$  Hz, 2H), 7.58 (t,  $J = 7.8$  Hz, 2H) ppm.  $^{13}\text{C}$  NMR (100 MHz, DMSO)  $\delta$  167.4, 142.9, 140.0, 136.6, 135.7, 133.2, 132.7, 132.5, 132.0, 128.9, 128.3, 127.9, 117.4, 116.9, 113.7, 110.7 ppm. HRMS (ESI,  $m/z$ ) calcd for  $\text{C}_{20}\text{H}_{14}\text{N}_2\text{OI}$   $[\text{M-OTf}]^+$ : 425.01453, found: 425.01404.

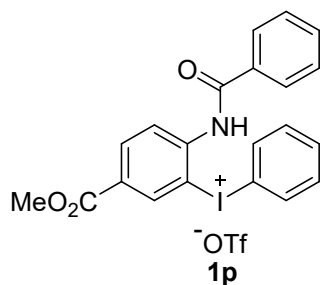

**(2-benzamido-5-(methoxycarbonyl)phenyl)(phenyl)iodonium trifluoromethanesulfonate (1p)**

$^1\text{H}$  NMR (400 MHz, DMSO)  $\delta$  11.30 (s, 1H), 8.60 (d,  $J = 1.8$  Hz, 1H), 8.25 (d,  $J = 7.4$  Hz, 2H), 8.21 (dd,  $J = 8.4, 1.8$  Hz, 1H), 8.10 – 8.04 (m, 2H), 7.73 (dd,  $J = 13.1, 7.8$  Hz, 3H), 7.65 (t,  $J = 7.5$  Hz, 2H), 7.56 (t,  $J = 7.8$  Hz, 2H), 3.85 (s, 3H) ppm.  $^{13}\text{C}$  NMR (100 MHz, DMSO)  $\delta$  167.6, 164.1, 142.6, 136.7, 135.7, 133.2, 133.1, 132.6, 132.5, 131.9, 129.3, 128.9, 128.2, 127.4, 117.2, 113.5, 52.8 ppm. HRMS (ESI,  $m/z$ ) calcd for  $\text{C}_{21}\text{H}_{17}\text{NO}_3\text{I}$   $[\text{M-OTf}]^+$ : 458.02476, found: 458.02411.

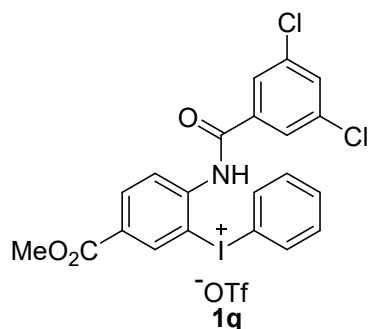

**(2-(3,5-dichlorobenzamido)-5-(methoxycarbonyl)phenyl)(phenyl)iodonium trifluoromethanesulfonate (1q)**

$^1\text{H}$  NMR (400 MHz, DMSO)  $\delta$  10.43 (s, 1H), 8.42 (d,  $J$  = 1.9 Hz, 1H), 8.01 (dd,  $J$  = 6.7, 1.9 Hz, 3H), 7.93 (t,  $J$  = 1.9 Hz, 1H), 7.63 (d,  $J$  = 8.3 Hz, 1H), 3.87 (s, 3H) ppm.  $^{13}\text{C}$  NMR (100 MHz, DMSO)  $\delta$  164.6, 162.7, 143.7, 139.6, 137.1, 134.5, 131.5, 129.6, 129.1, 128.0, 126.6, 97.8, 52.5 ppm. HRMS (ESI,  $m/z$ ) calcd for  $\text{C}_{21}\text{H}_{15}\text{NO}_3\text{Cl}_2\text{I}$   $[\text{M}-\text{OTf}]^+$ : 525.94682, found: 525.94659.

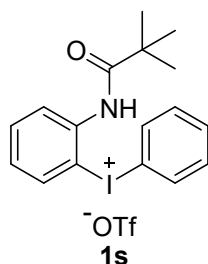

**phenyl(2-pivalamidophenyl)iodonium trifluoromethanesulfonate (1s)**

$^1\text{H}$  NMR (400 MHz, DMSO)  $\delta$  10.17 (s, 1H), 8.18 (d,  $J$  = 7.7 Hz, 2H), 8.00 (d,  $J$  = 8.1 Hz, 1H), 7.71 (t,  $J$  = 7.4 Hz, 1H), 7.64 (t,  $J$  = 7.6 Hz, 1H), 7.56 (t,  $J$  = 7.8 Hz, 2H), 7.49 – 7.44 (m, 1H), 7.34 – 7.27 (m, 1H), 1.32 (s, 9H) ppm.  $^{13}\text{C}$  NMR (100 MHz, DMSO)  $\delta$  179.4, 138.5, 135.7, 135.4, 133.0, 132.5, 131.9, 129.1, 127.6, 116.7, 114.7, 27.0 ppm. HRMS (ESI,  $m/z$ ) calcd for  $\text{C}_{17}\text{H}_{19}\text{NOI}$   $[\text{M}-\text{OTf}]^+$ : 380.05058, found: 380.05011.

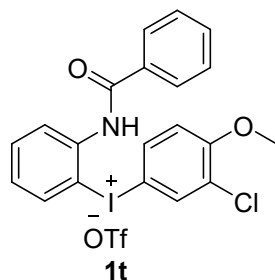

**(2-benzamidophenyl)(3-chloro-4-methoxyphenyl)iodonium trifluoromethanesulfonate (1t)**

$^1\text{H}$  NMR (400 MHz, DMSO)  $\delta$  11.13 (s, 1H), 8.39 (d,  $J$  = 2.2 Hz, 1H), 8.19 (dd,  $J$  = 8.9, 2.1 Hz, 1H), 8.07 (t,  $J$  = 7.6 Hz, 3H), 7.75 – 7.58 (m, 5H), 7.38 (t,  $J$  = 7.6 Hz, 1H), 7.31 (d,  $J$  = 9.0 Hz, 1H), 3.93 (s, 3H) ppm.  $^{13}\text{C}$  NMR (101 MHz, DMSO)  $\delta$  167.6, 157.8, 138.1, 136.7, 136.6, 135.5, 132.9, 132.7, 129.3, 128.8, 128.1, 127.7, 123.2, 115.6, 114.9, 105.4, 56.8. HRMS (ESI,  $m/z$ ) calcd for  $\text{C}_{20}\text{H}_{16}\text{NO}_2\text{ClI}$   $[\text{M}-\text{OTf}]^+$ : 463.99088, found: 463.99030.



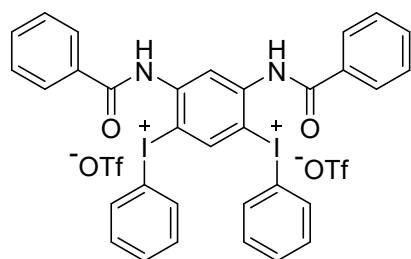

**3a**

**(4,6-bis(benzamido)-1,3-phenylene)bis(phenyliodonium) trifluoromethanesulfonate (3a)**

$^1\text{H}$  NMR (400 MHz, DMSO)  $\delta$  11.21 (s, 2H), 8.97 (s, 1H), 8.11 (d,  $J = 7.5$  Hz, 4H), 8.06 – 8.00 (m, 4H), 7.89 (s, 1H), 7.72 (q,  $J = 7.3$  Hz, 4H), 7.64 (t,  $J = 7.5$  Hz, 4H), 7.52 (t,  $J = 7.8$  Hz, 4H) ppm.  $^{13}\text{C}$  NMR (100 MHz, DMSO)  $\delta$  167.3, 143.4, 142.6, 135.4, 133.1, 132.7, 132.0, 128.9, 128.2, 125.4, 122.0, 119.4, 117.3, 112.1 ppm. HRMS (ESI,  $m/z$ ) calcd for  $\text{C}_{32}\text{H}_{23}\text{N}_2\text{O}_2\text{I}_2$   $[\text{M}-2\text{OTf}-\text{H}]^+$ : 720.98434, found: 720.98279; HRMS (ESI,  $m/z$ ) calcd for  $\text{C}_{33}\text{H}_{24}\text{N}_2\text{O}_5\text{F}_3\text{SI}_2$   $[\text{M}-\text{OTf}]^+$ : 870.94419, found: 870.94250.

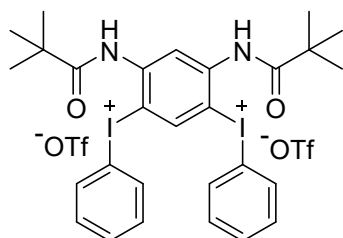

**3b**

**(4,6-dipivalamido-1,3-phenylene)bis(phenyliodonium) trifluoromethanesulfonate (3b)**

$^1\text{H}$  NMR (400 MHz, DMSO)  $\delta$  10.16 (d,  $J = 23.8$  Hz, 2H), 8.83 (s, 1H), 8.04 (d,  $J = 7.9$  Hz, 4H), 7.70 (t,  $J = 7.3$  Hz, 2H), 7.57 (s, 1H), 7.50 (t,  $J = 7.5$  Hz, 4H), 1.30 (s, 18H) ppm.  $^{13}\text{C}$  NMR (100 MHz, DMSO)  $\delta$  179.1, 143.1, 135.7, 133.0, 132.4, 125.7, 117.6, 112.9, 100.0, 39.7, 27.3 ppm. HRMS (ESI,  $m/z$ ) calcd for  $\text{C}_{28}\text{H}_{31}\text{N}_2\text{O}_2\text{I}_2$   $[\text{M}-2\text{OTf}-\text{H}]^+$ : 681.04694, found: 681.04633; HRMS (ESI,  $m/z$ ) calcd for  $\text{C}_{29}\text{H}_{32}\text{N}_2\text{O}_5\text{F}_3\text{SI}_2$   $[\text{M}-\text{OTf}]^+$ : 831.00679, found: 831.00586.

**Reference**

- [1] a) C. Dey, E. Lindstedt, B. Olofsson, *Org. Lett.* **2015**, *17*, 4554-4557; b) M. Bielawski, B. Olofsson, *Chem. Commun.*, **2007**, 2521-2523; c) M. Reitti, P. Villo, B. Olofsson, *Angew. Chem. Int. Ed.* **2016**, *55*, 8928-8932; *Angew. Chem.* **2016**, *128*, 9074-9078.

# <sup>1</sup>H and <sup>13</sup>C NMR spectra of all products

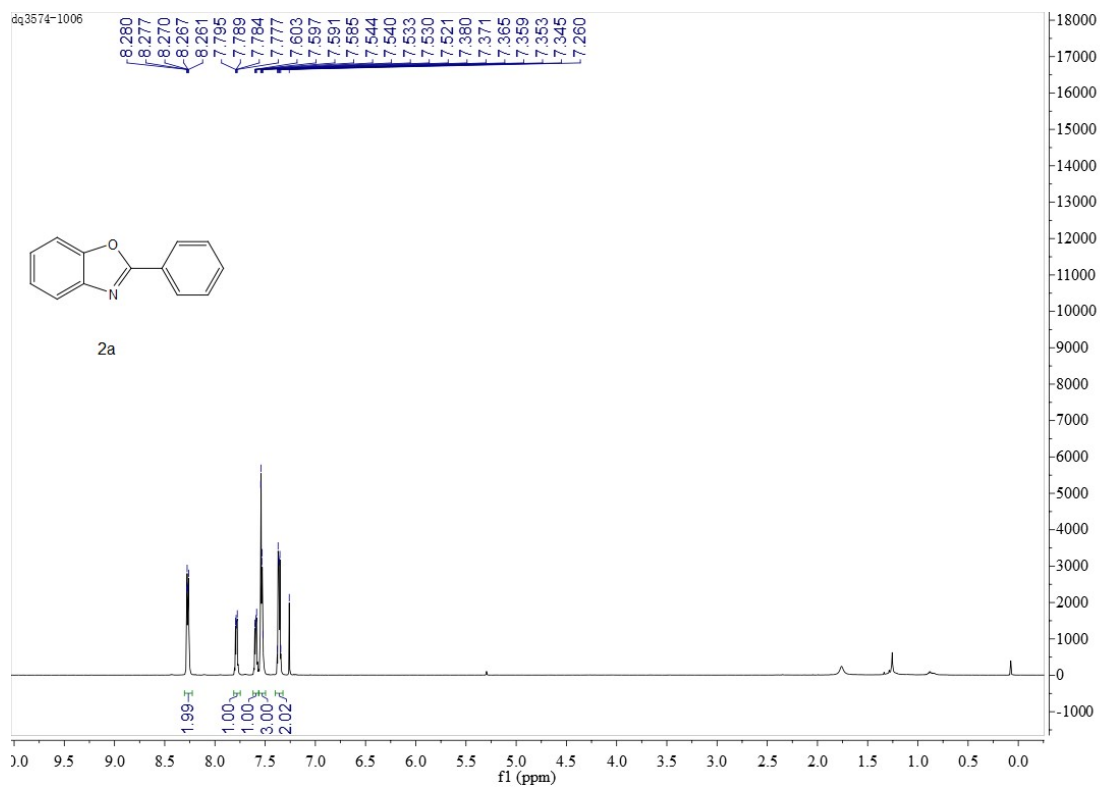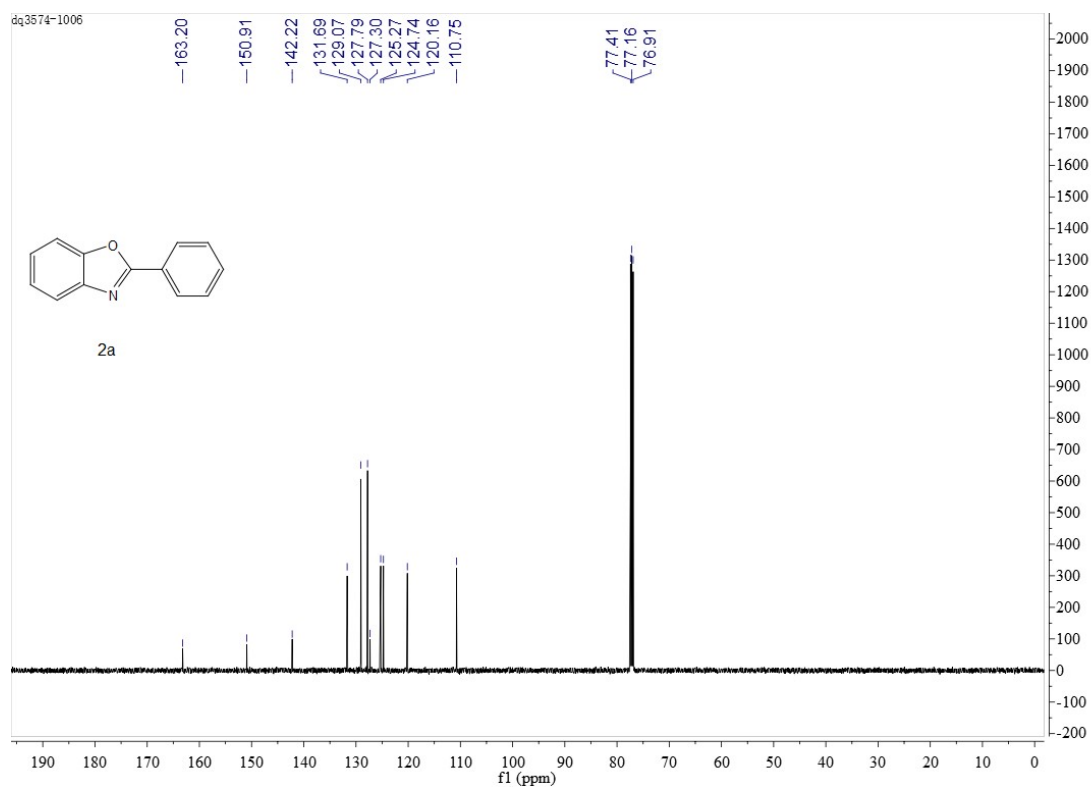

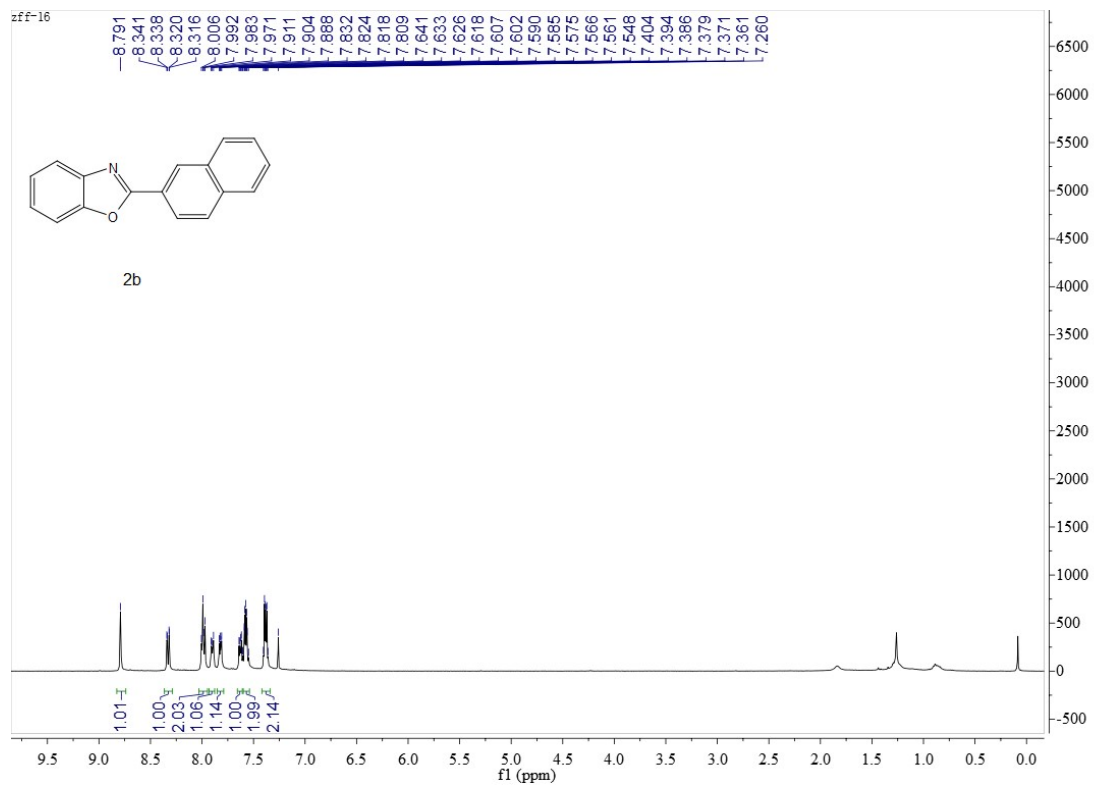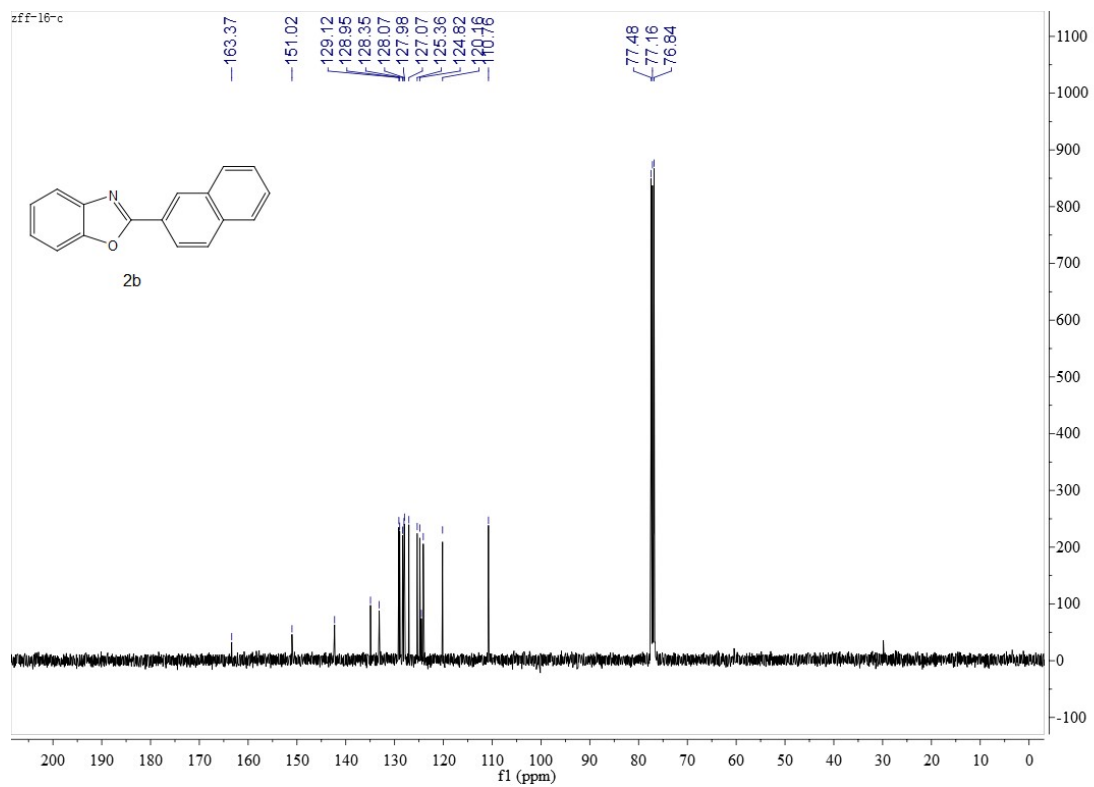

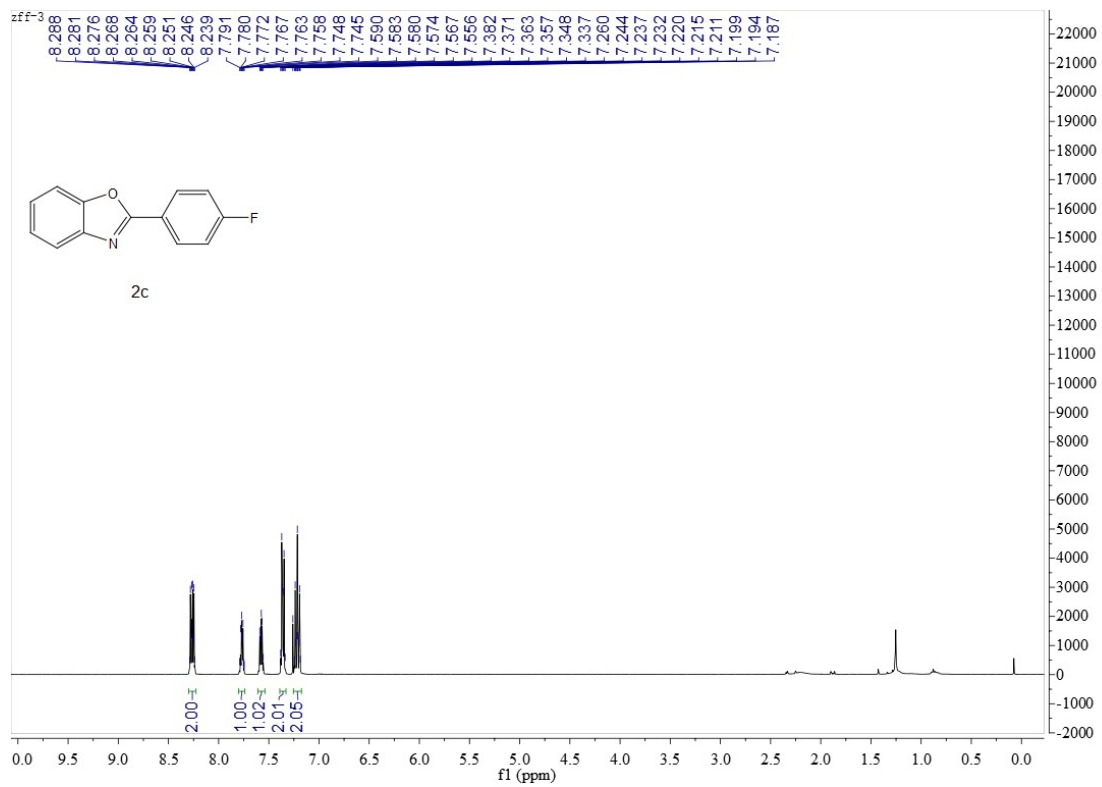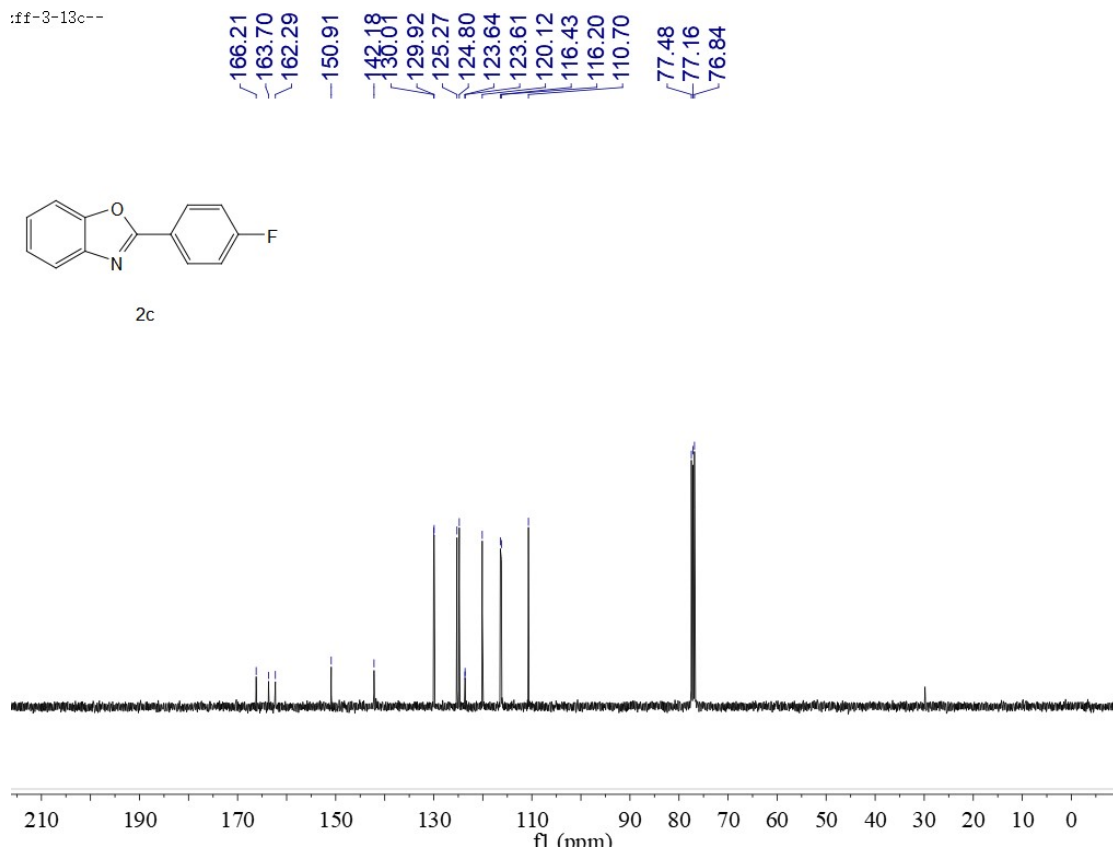

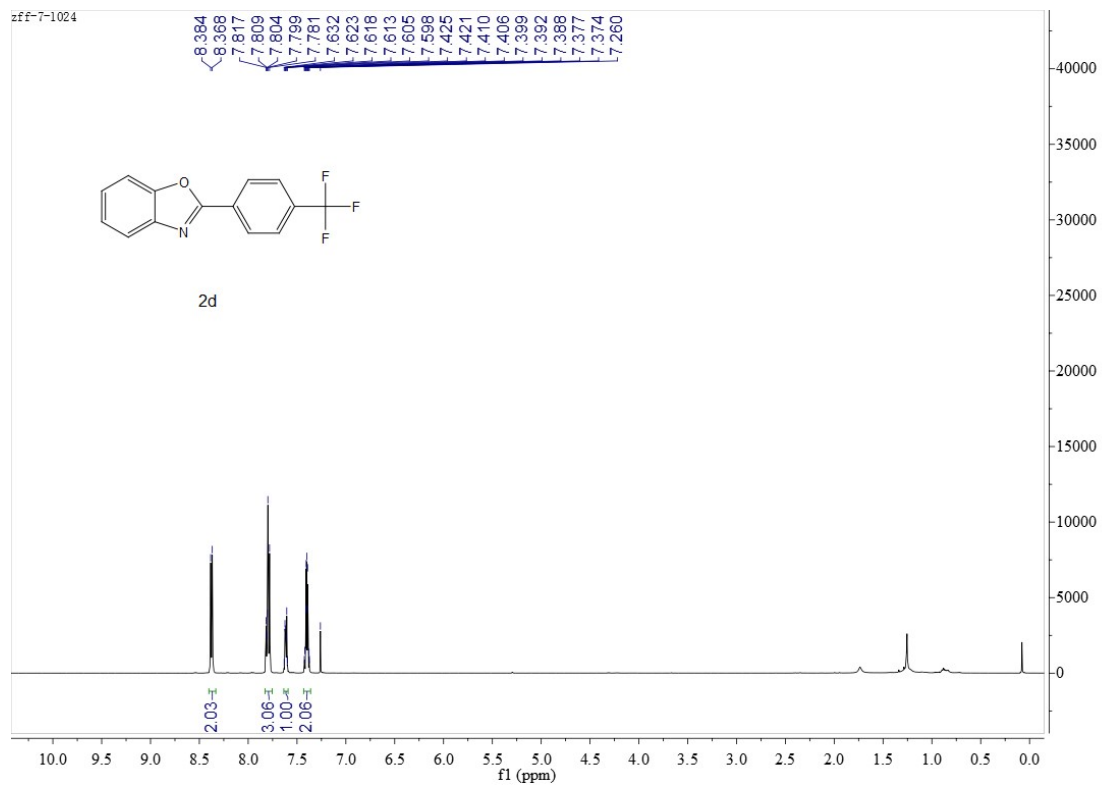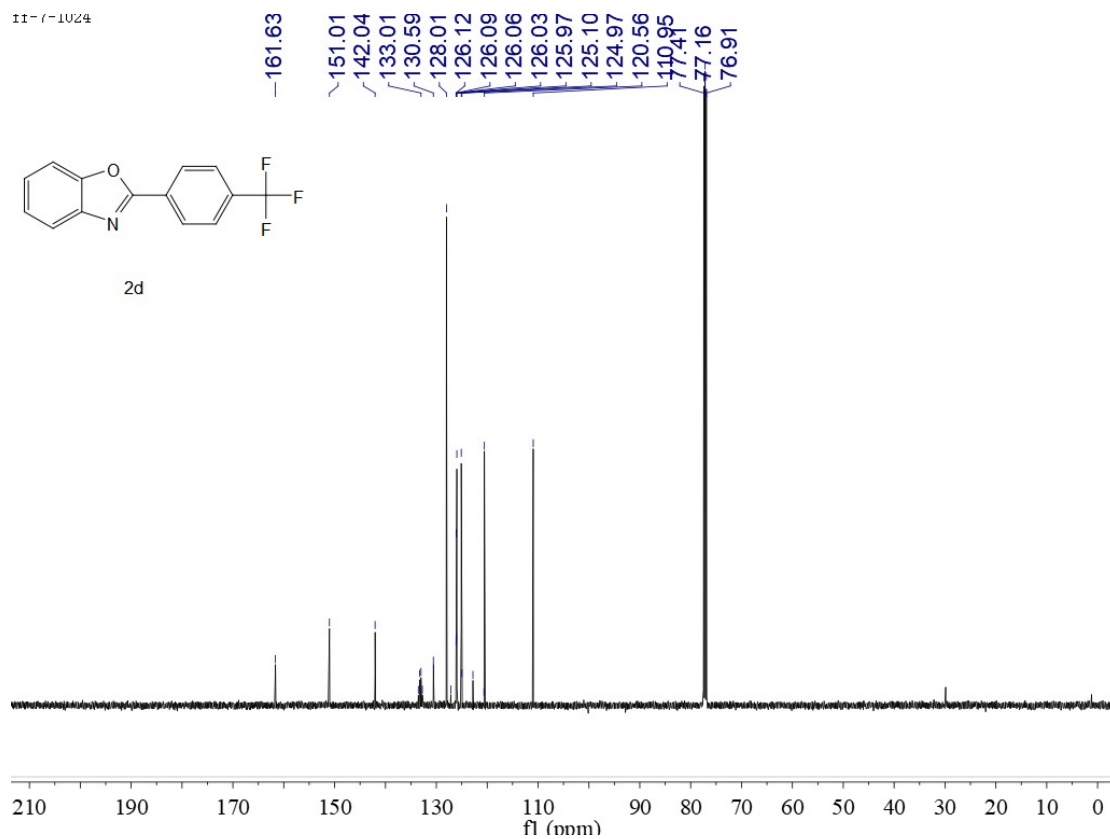

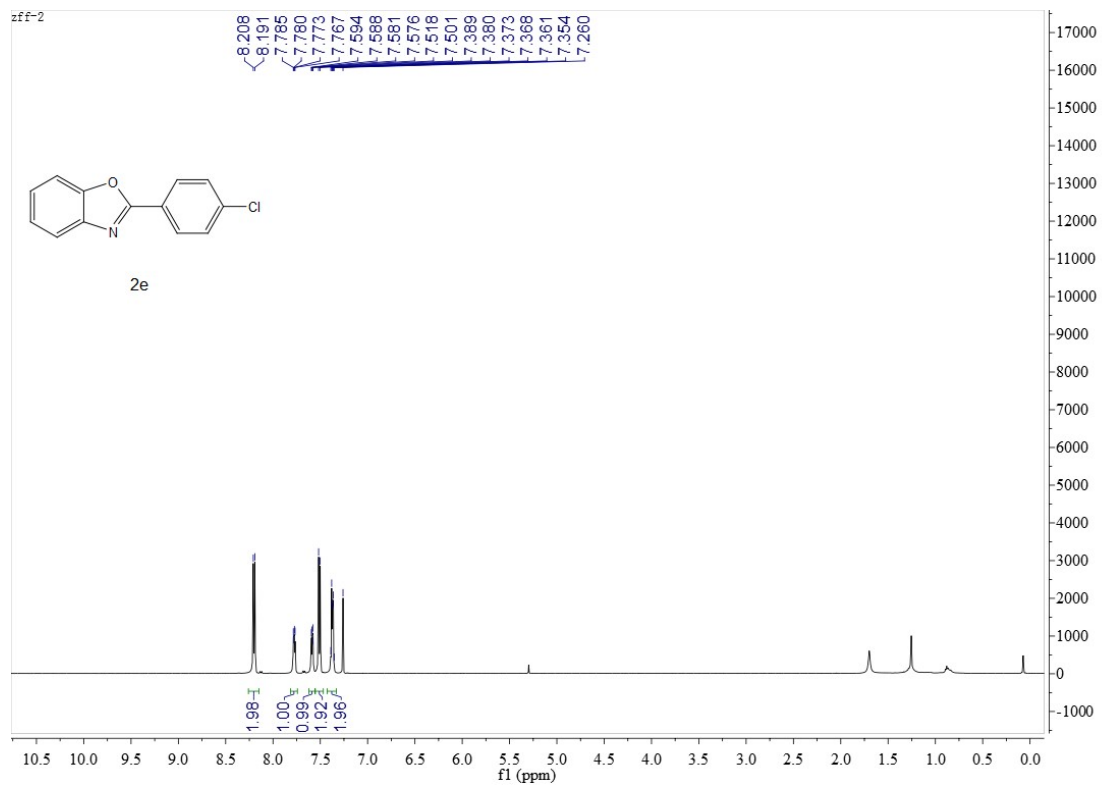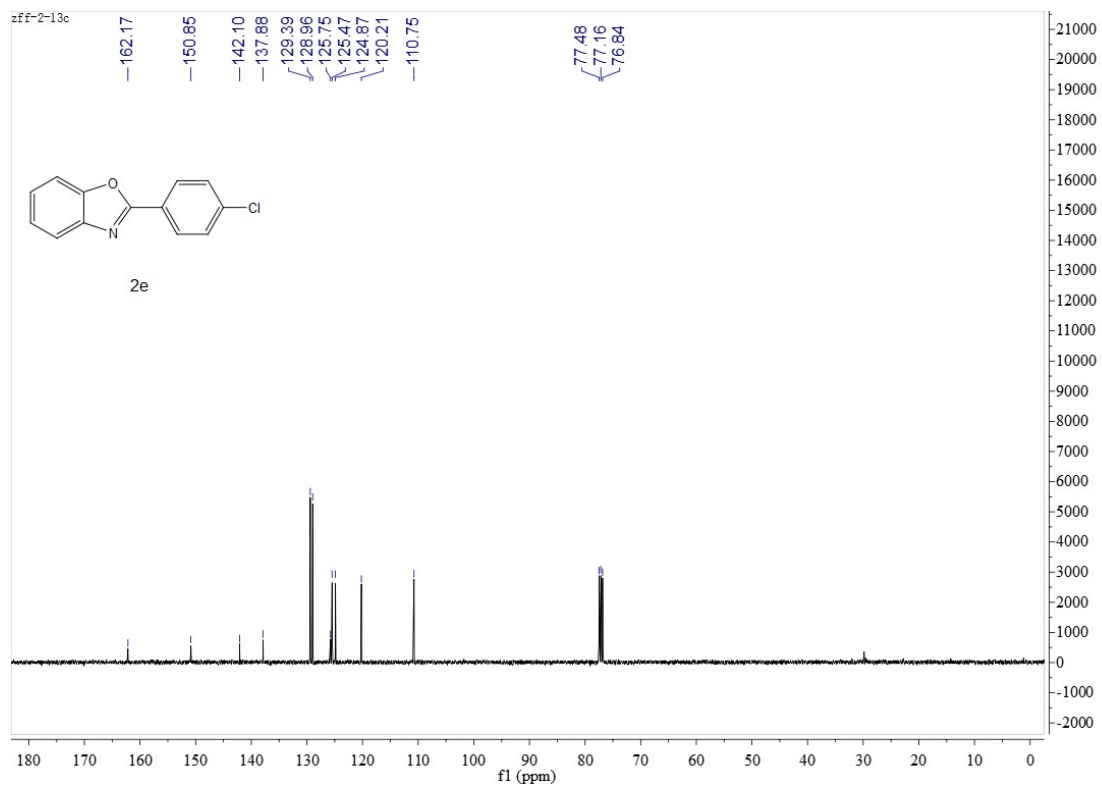

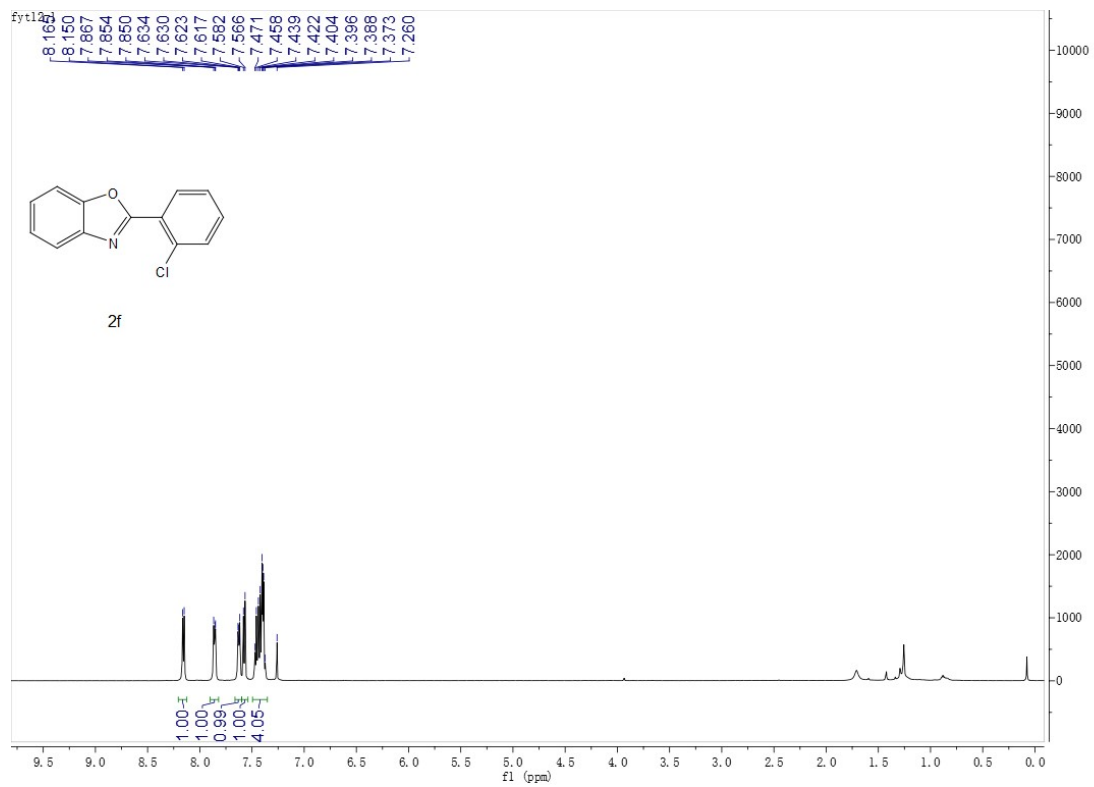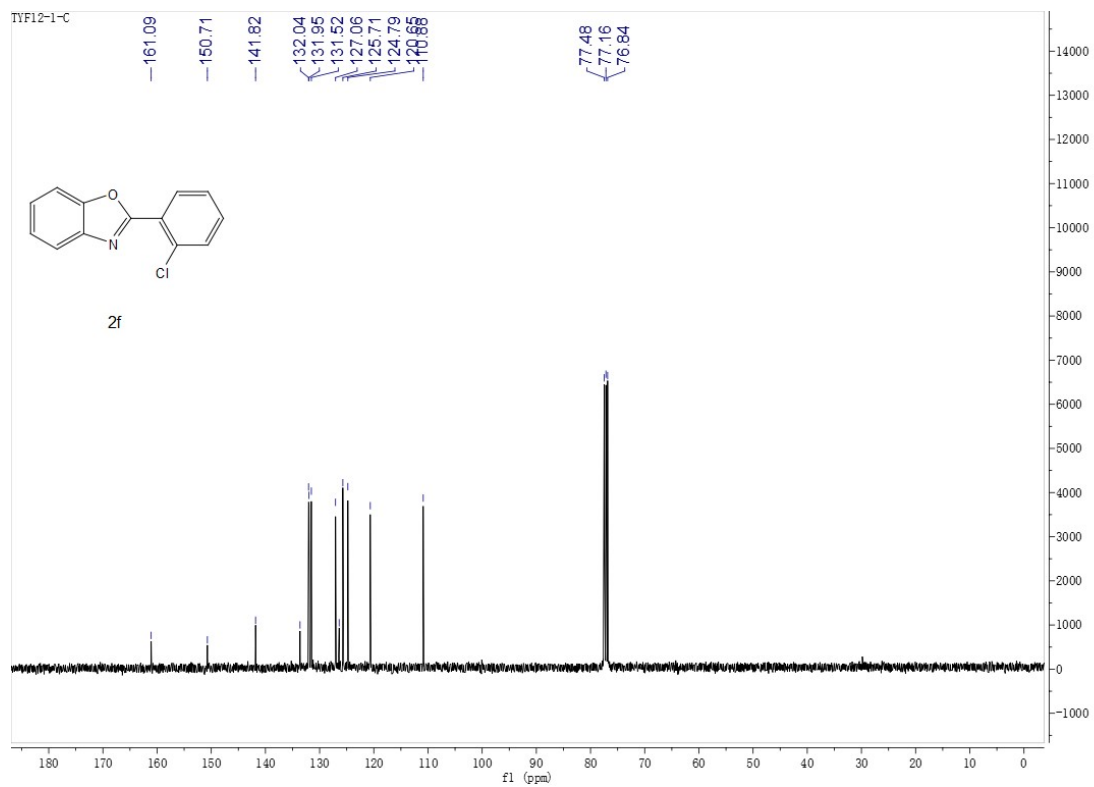

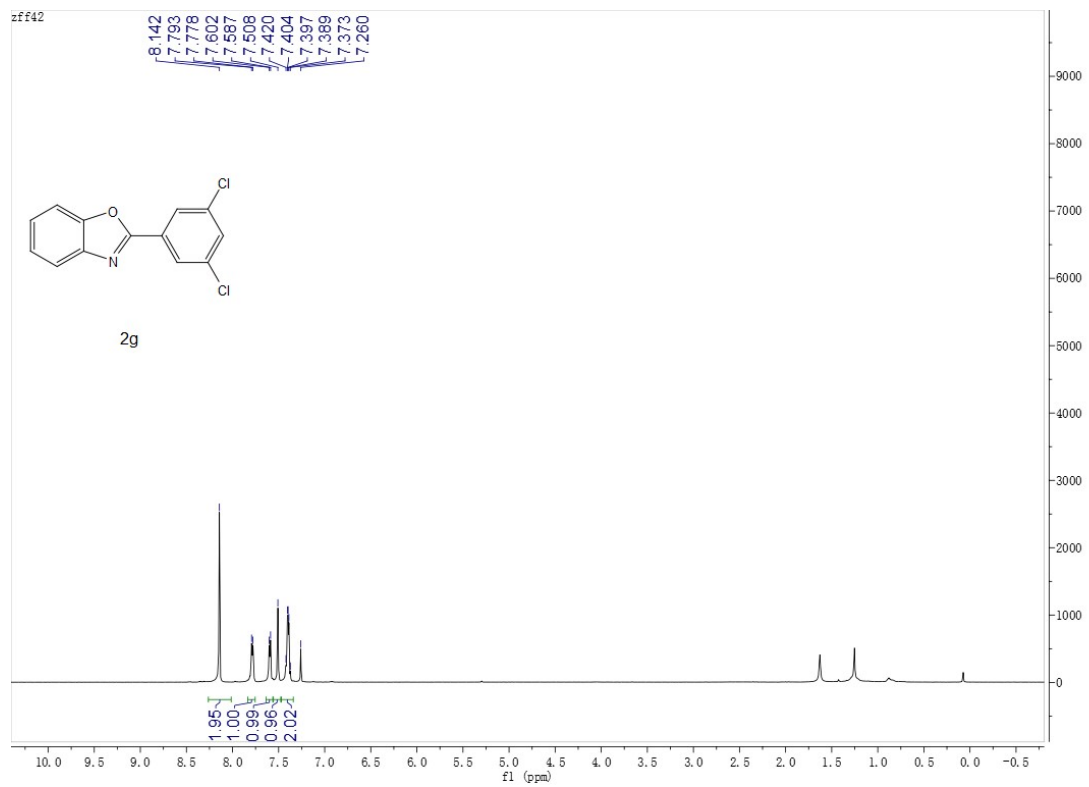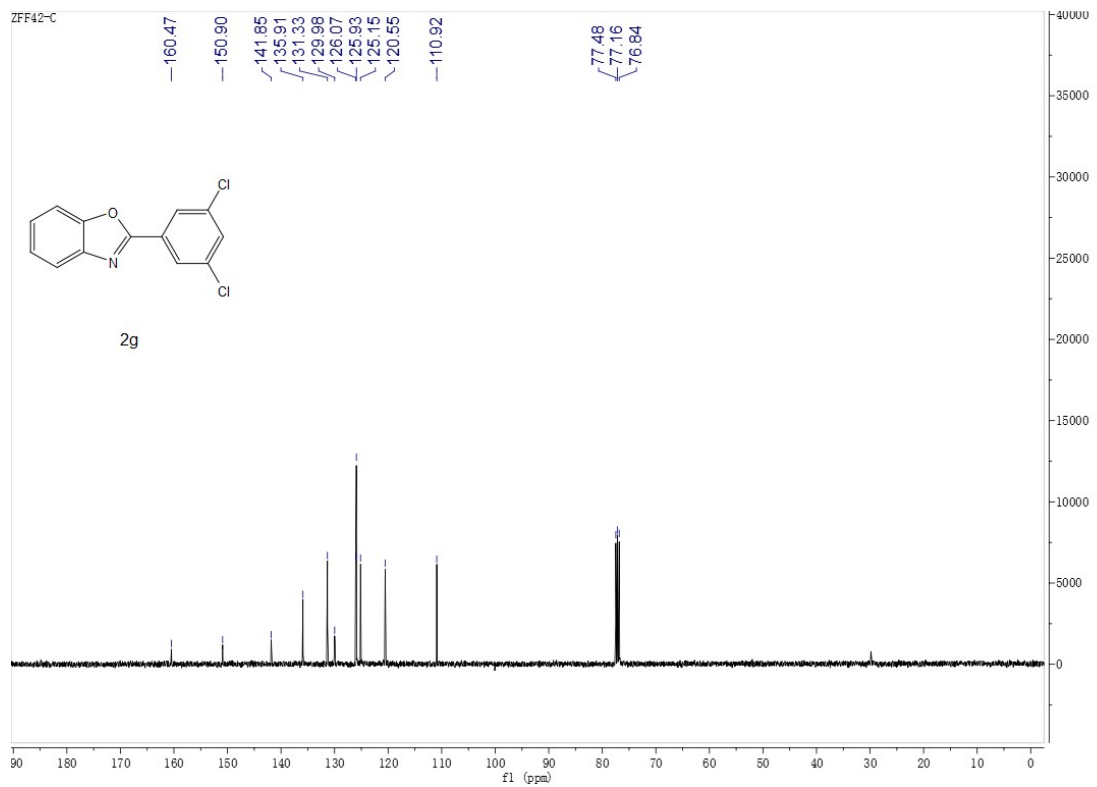



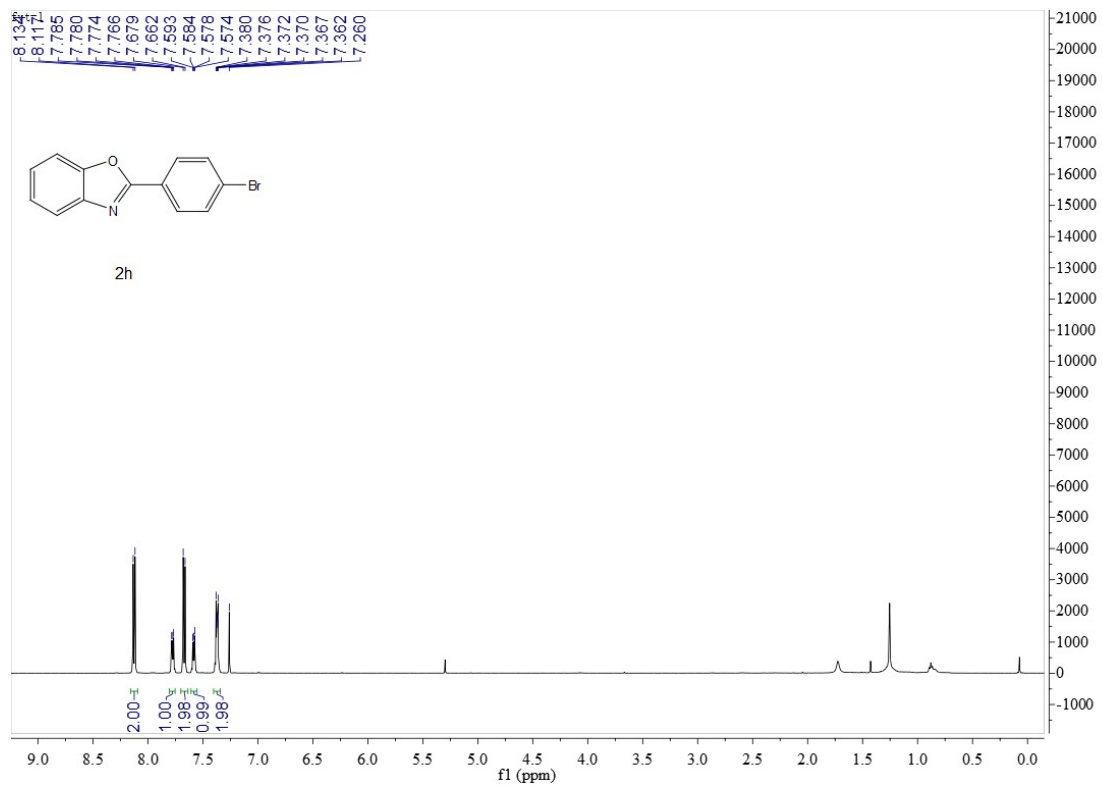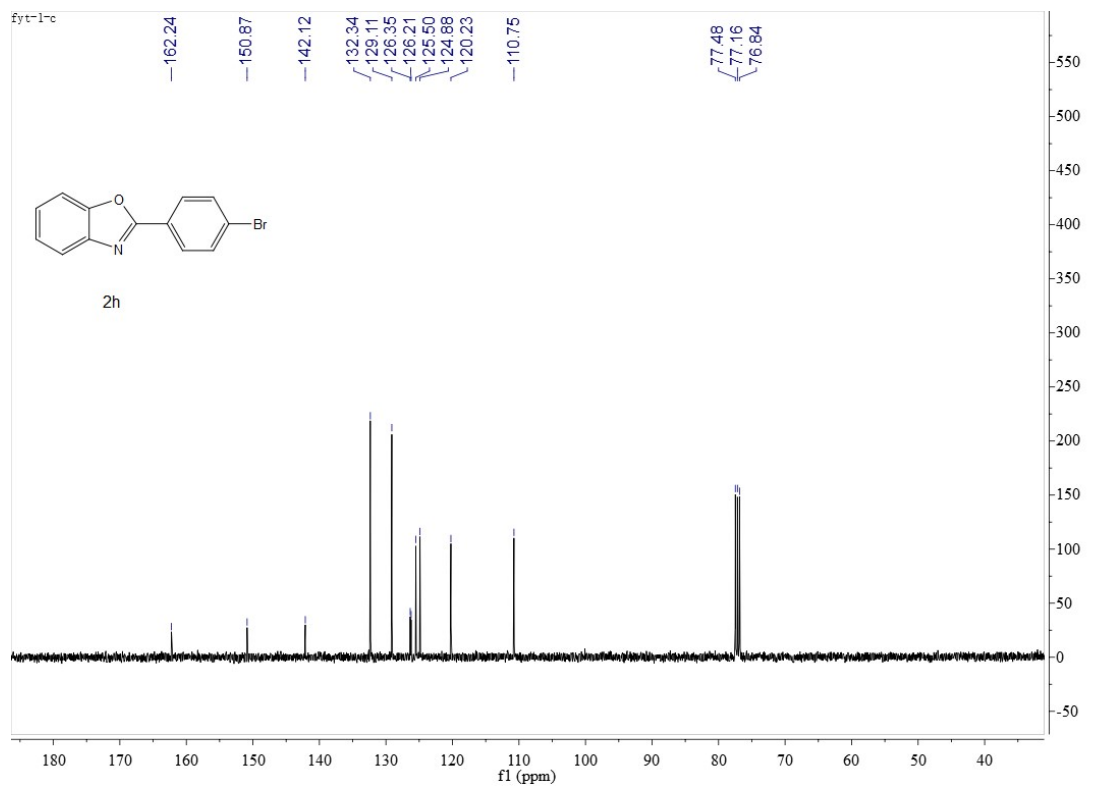

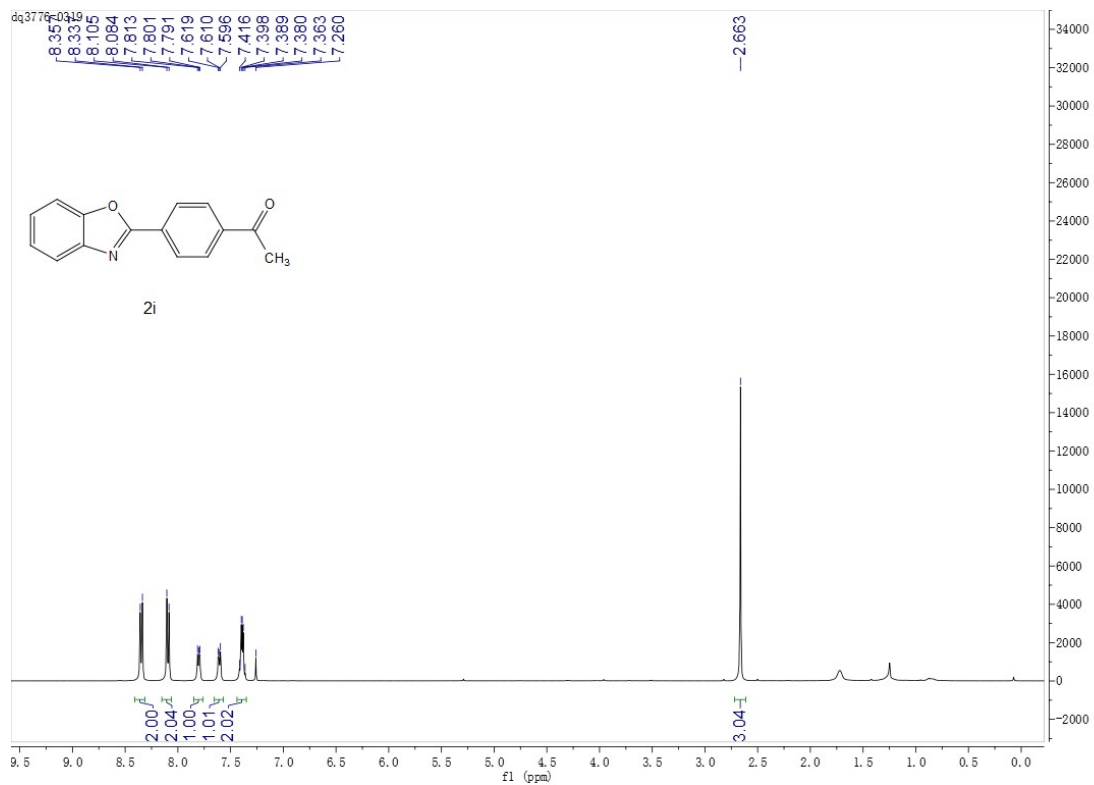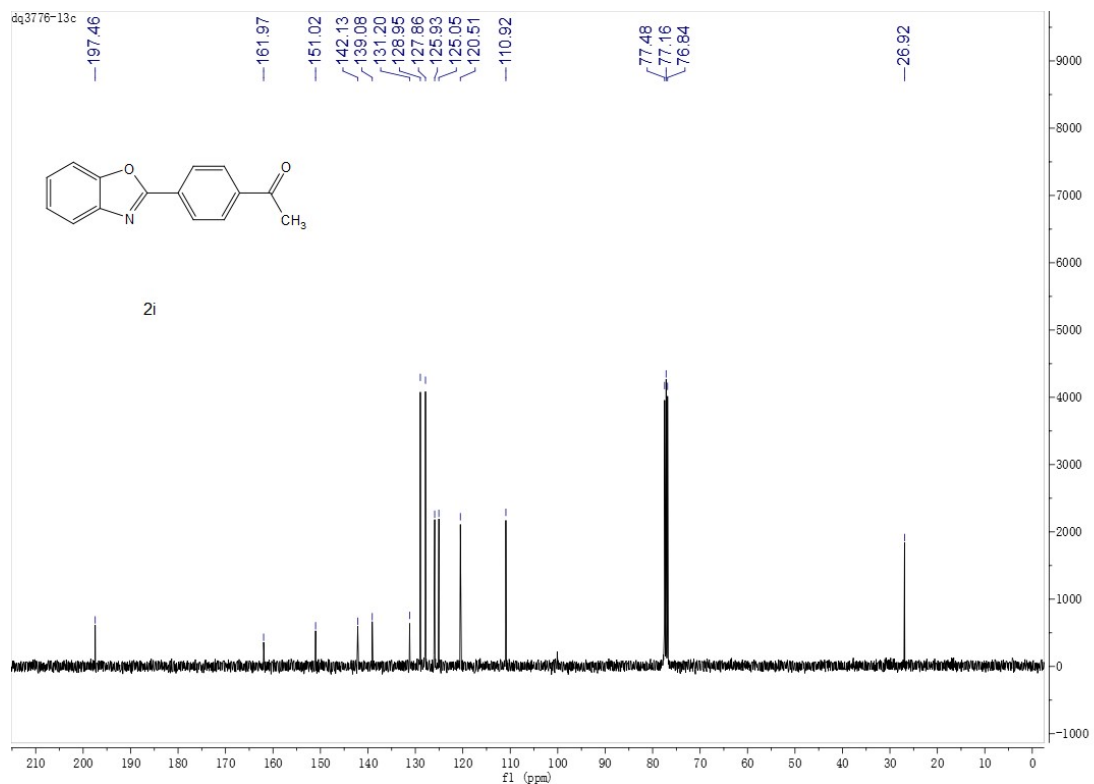

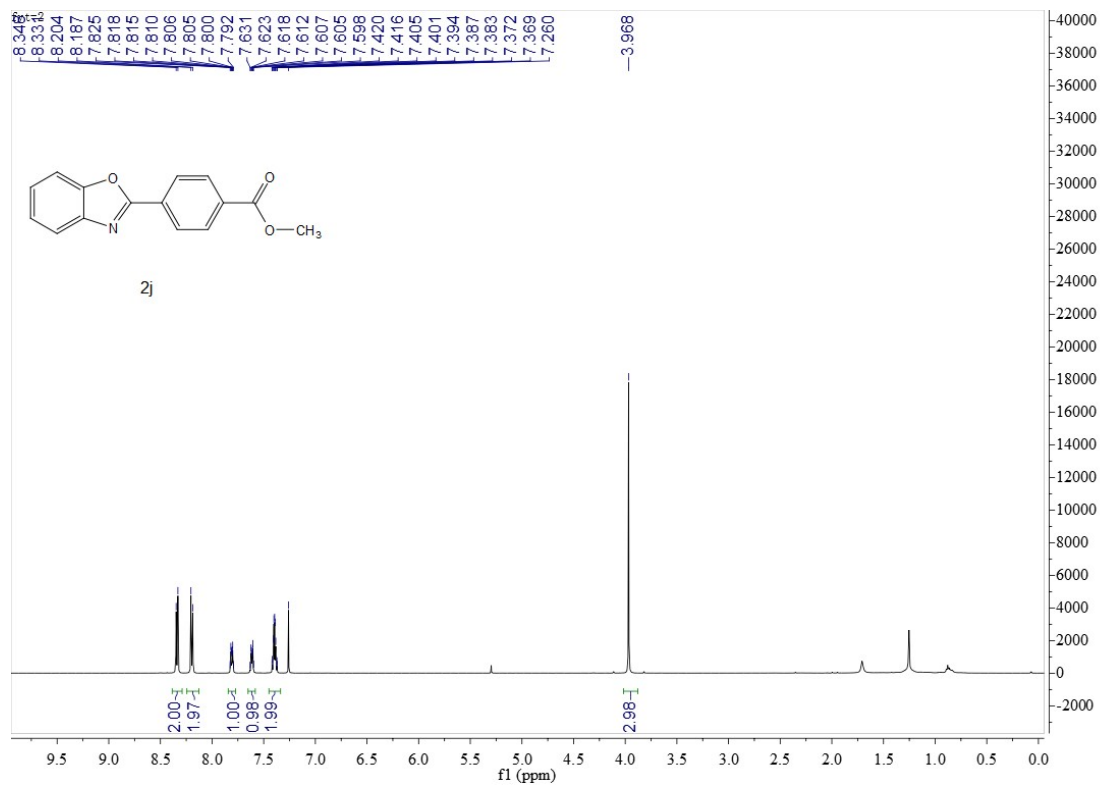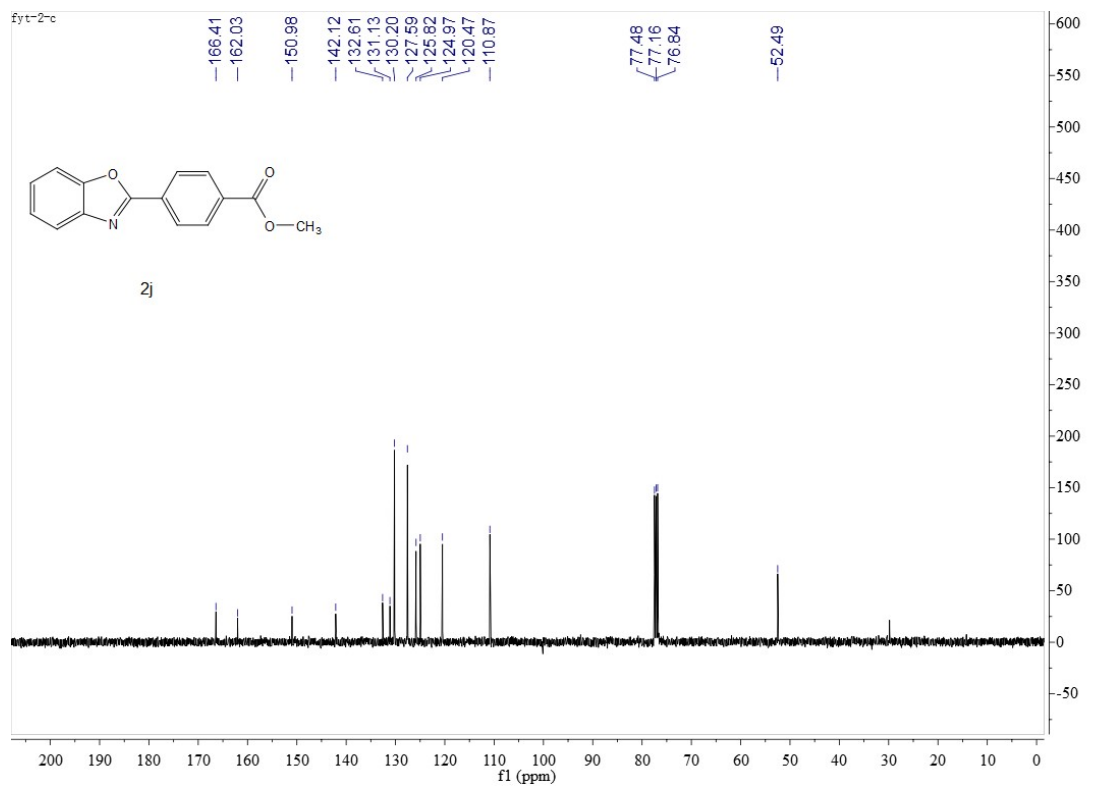

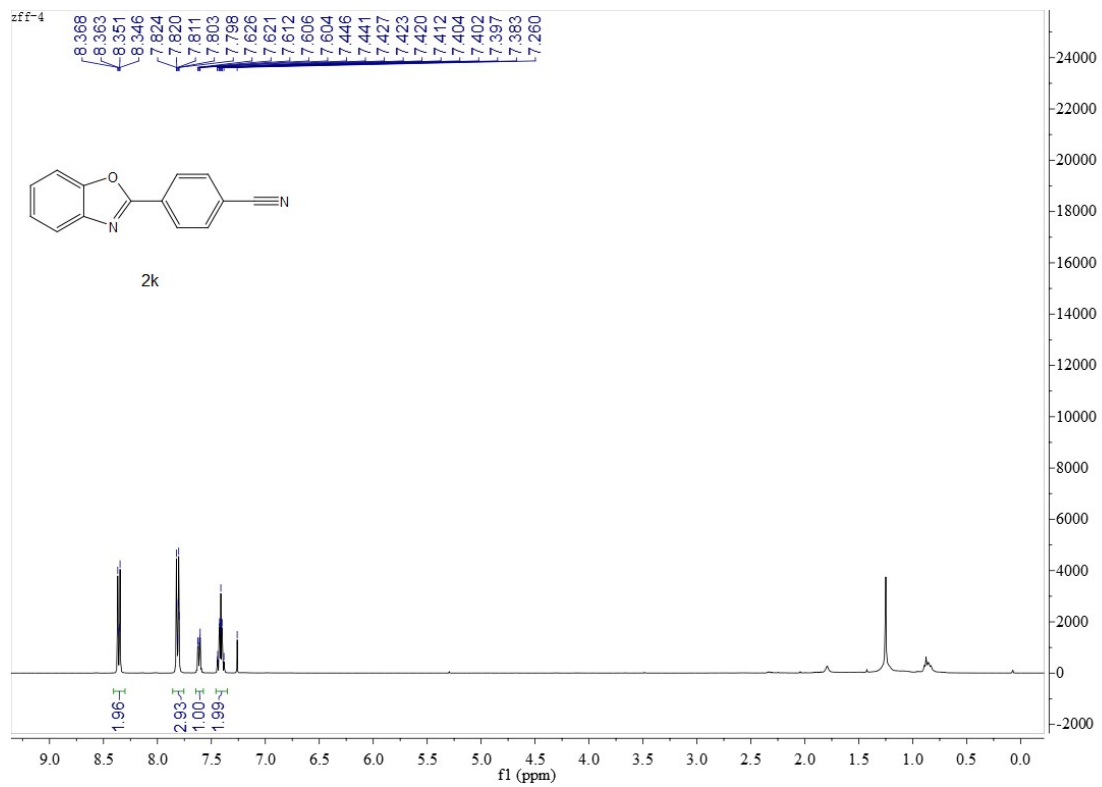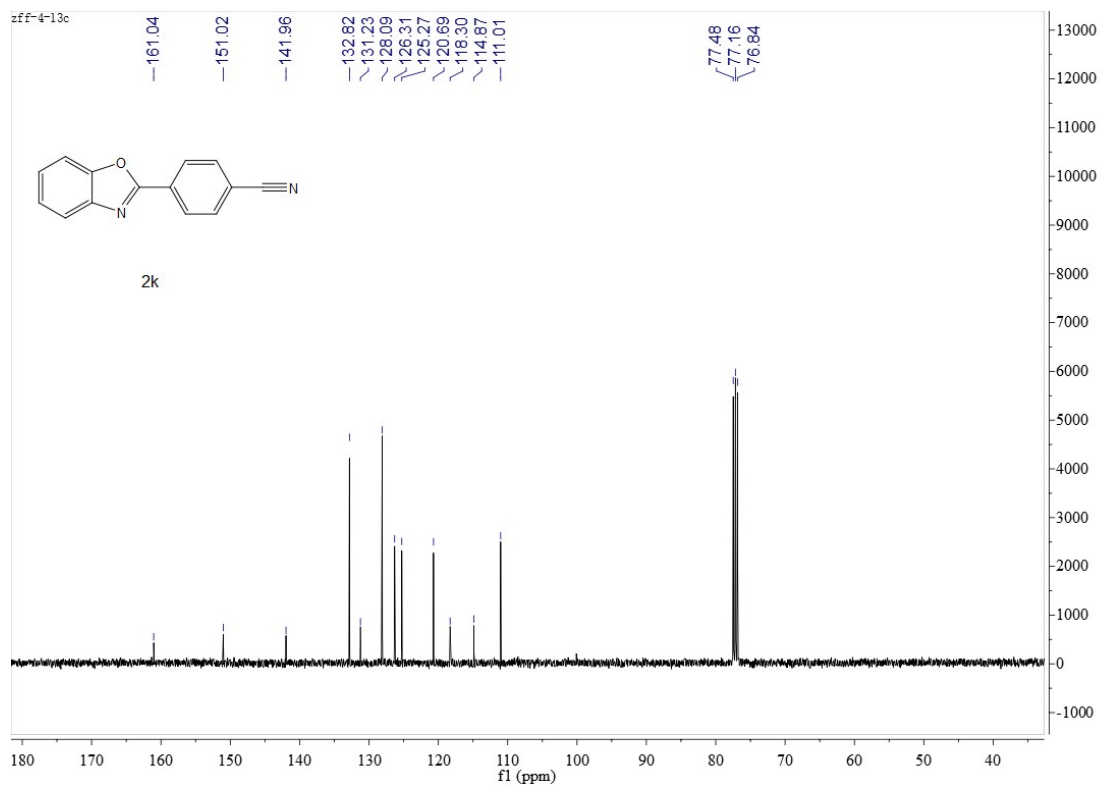

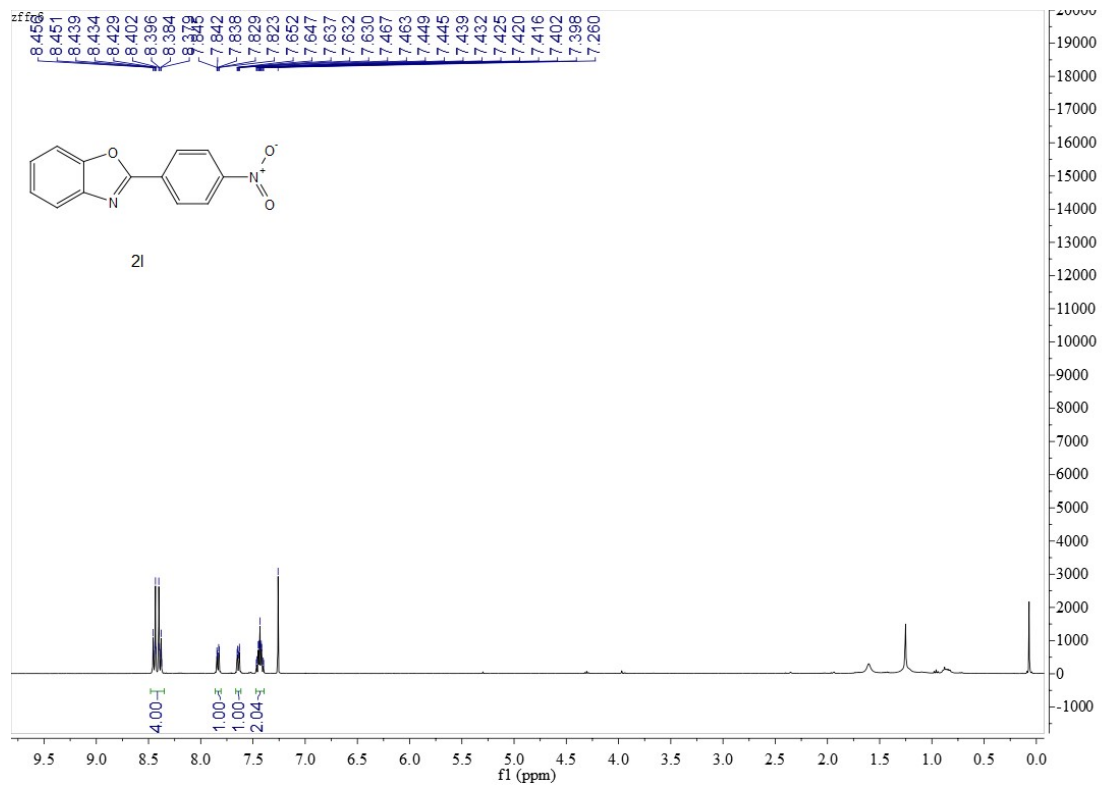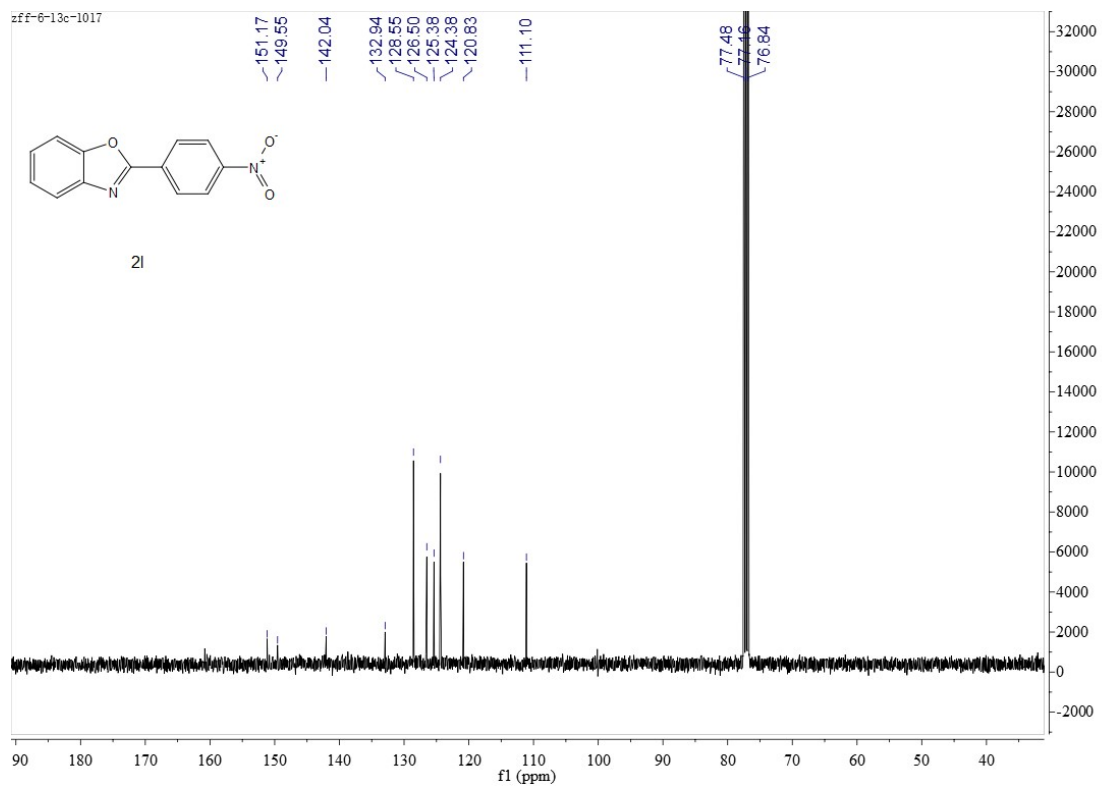

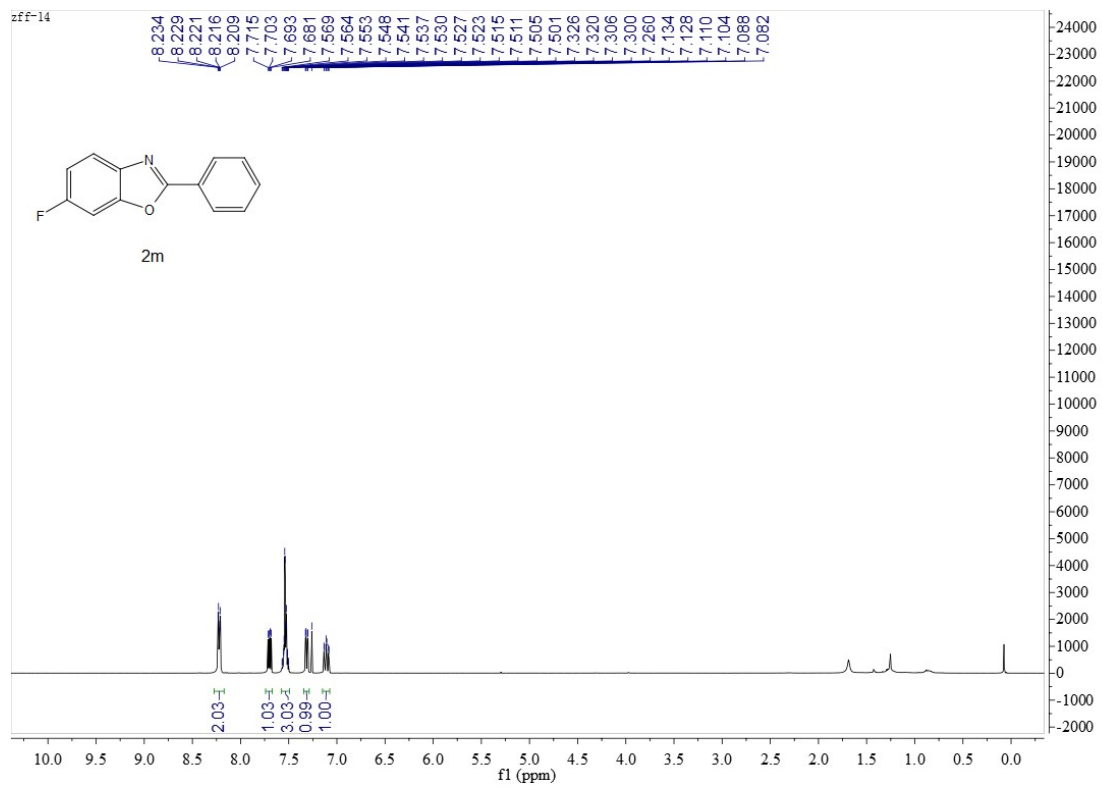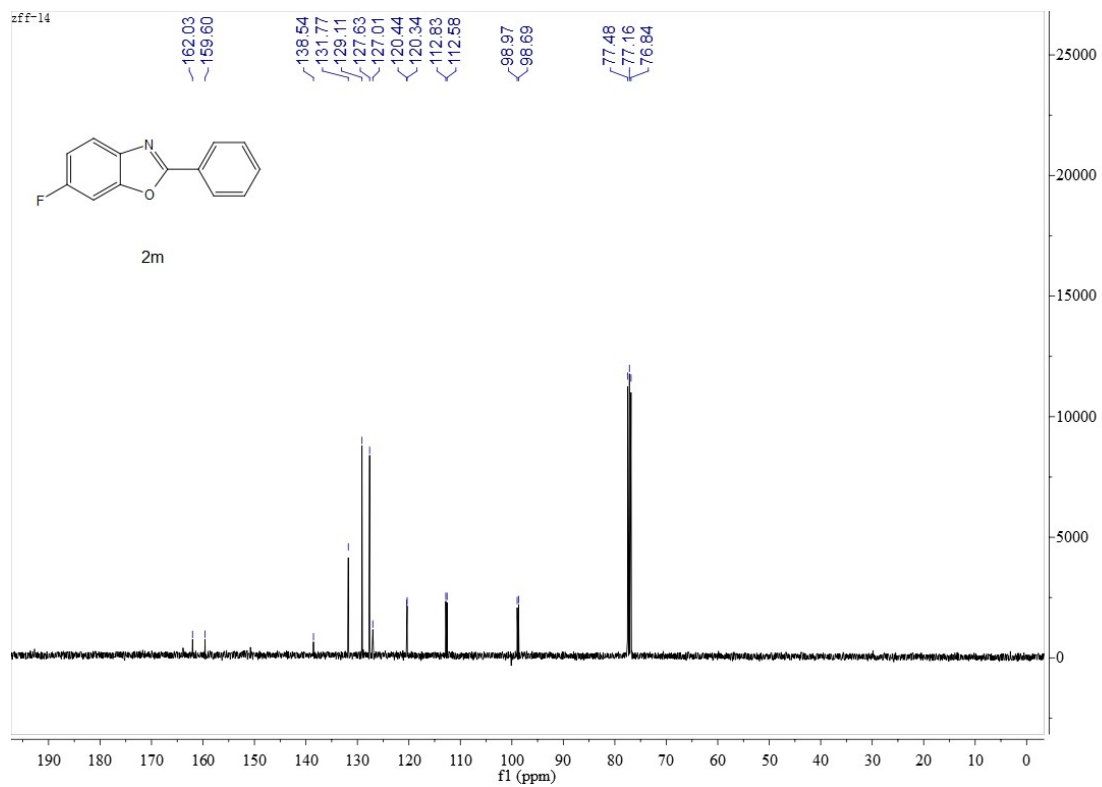

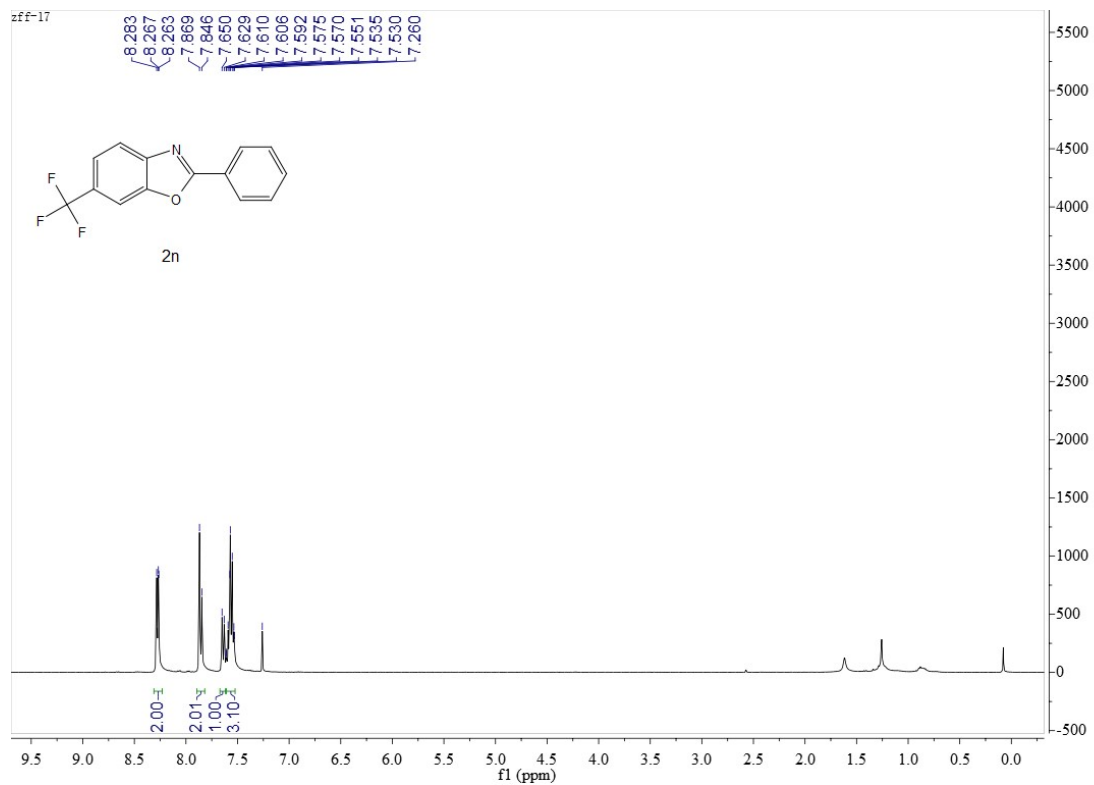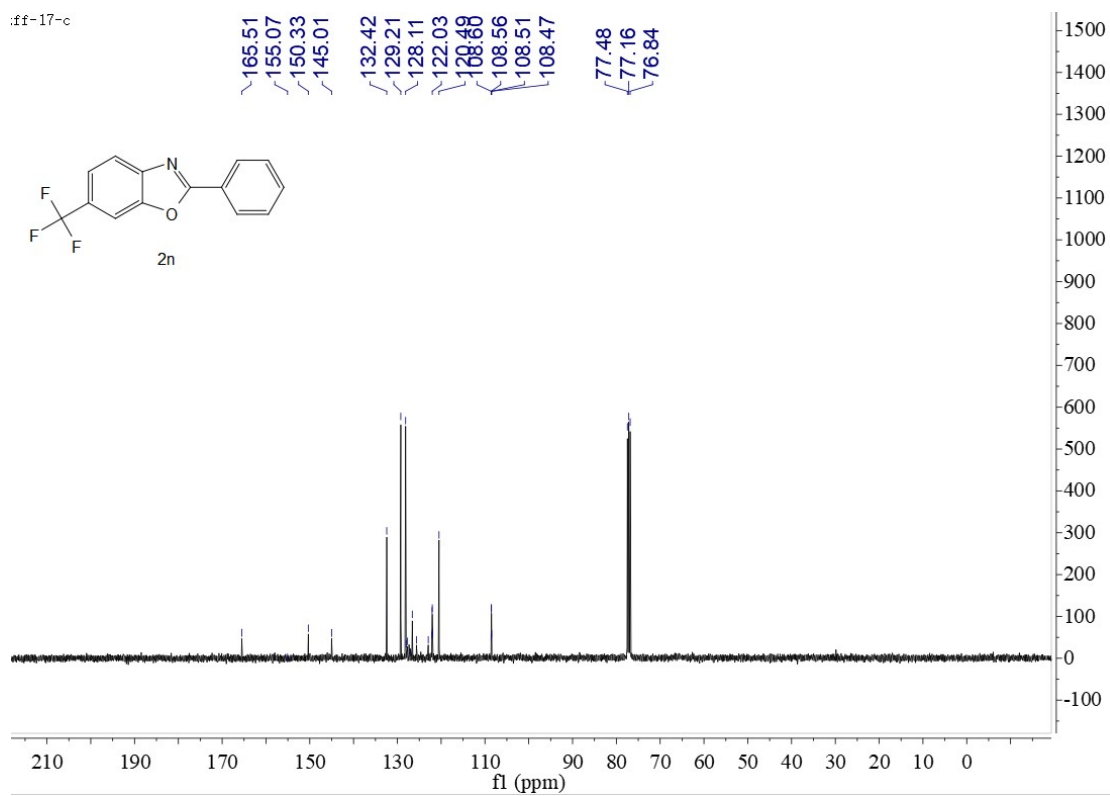

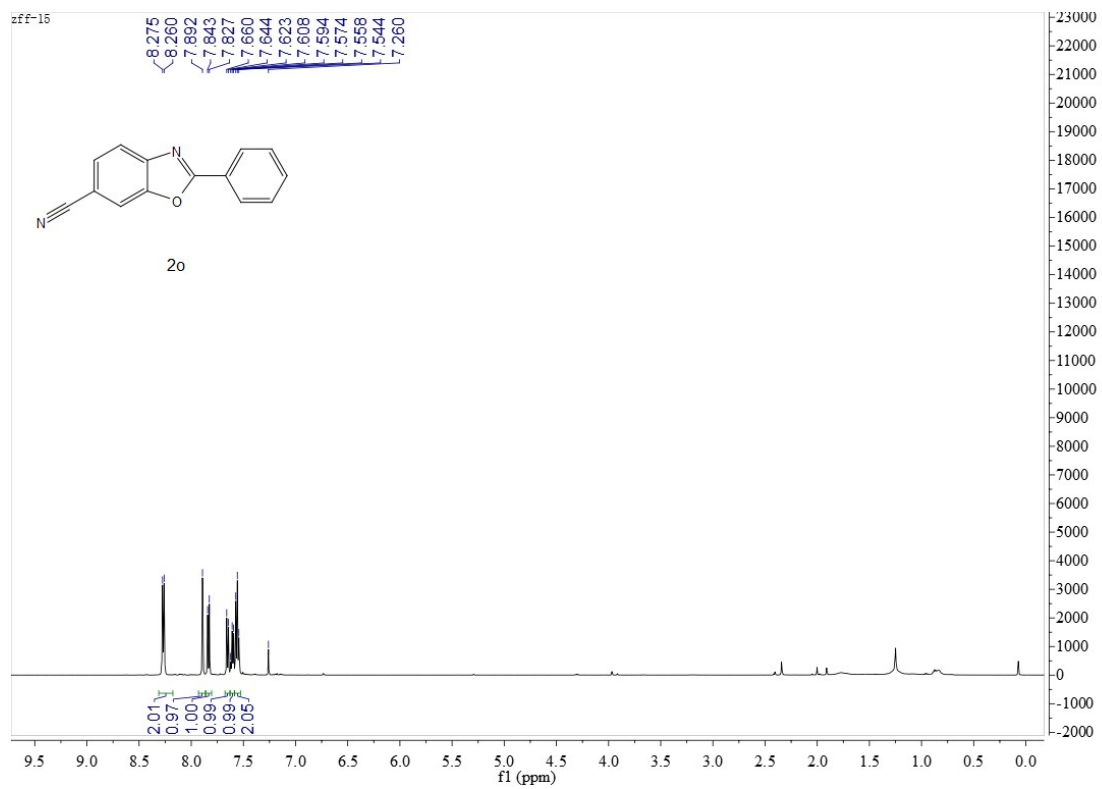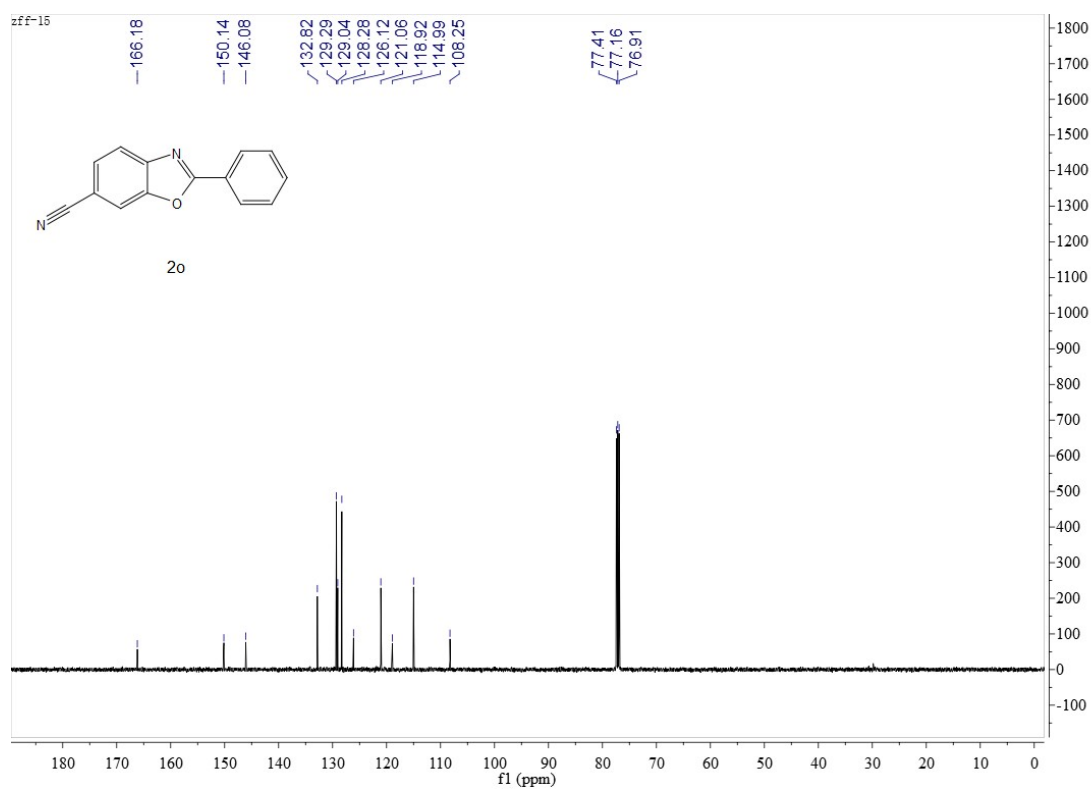



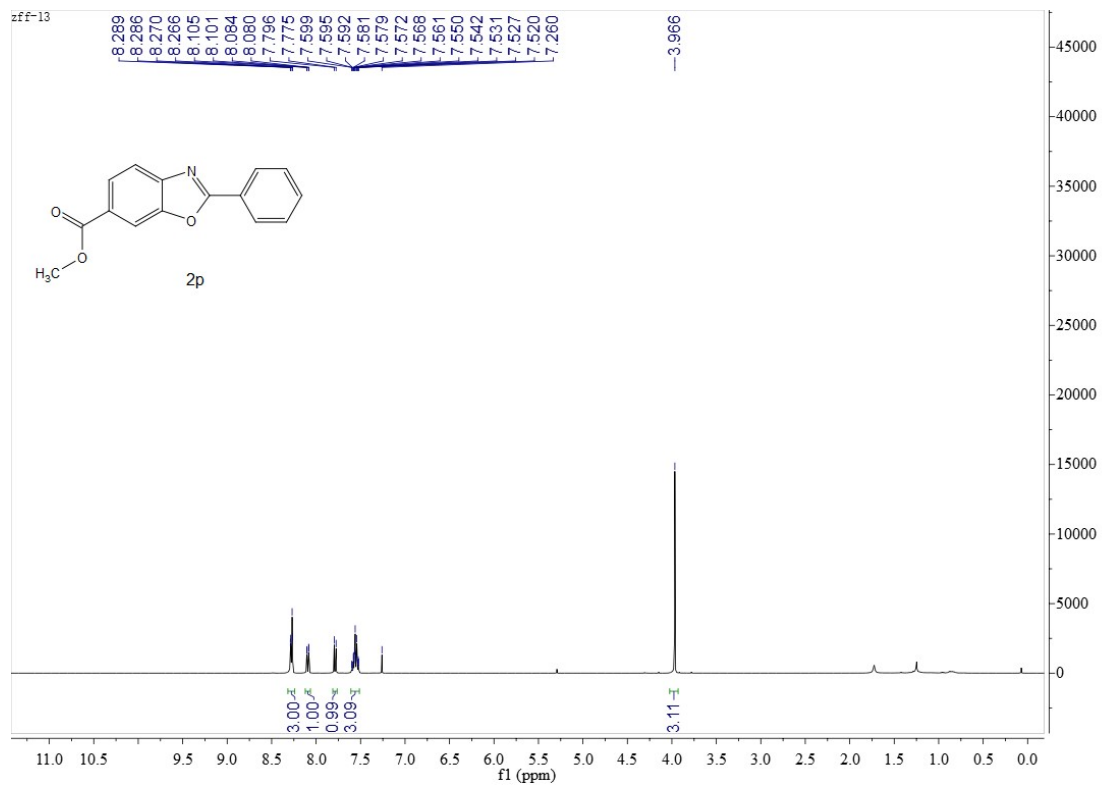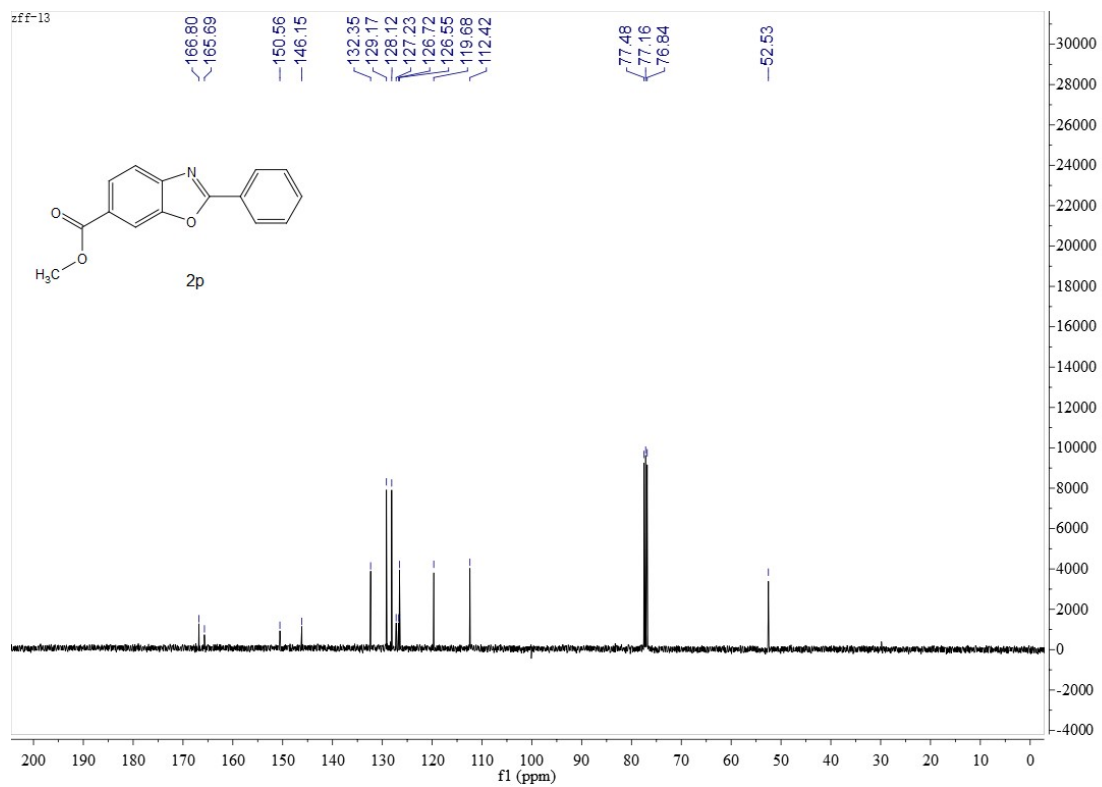

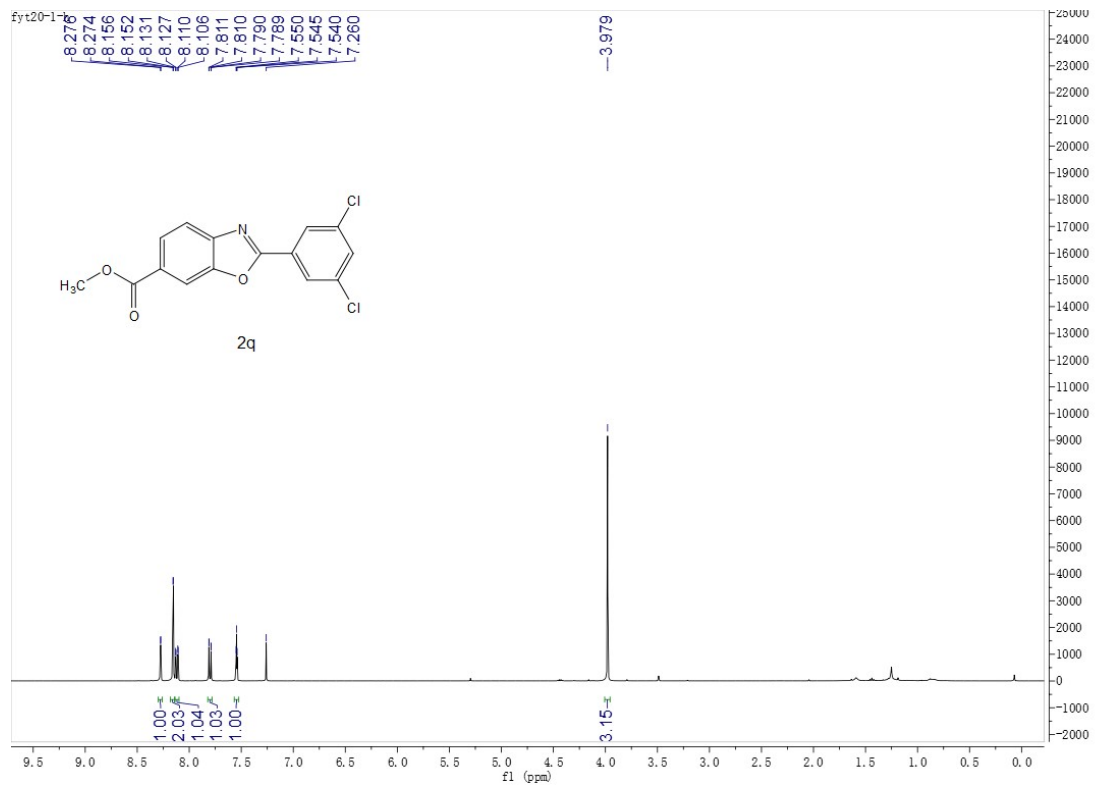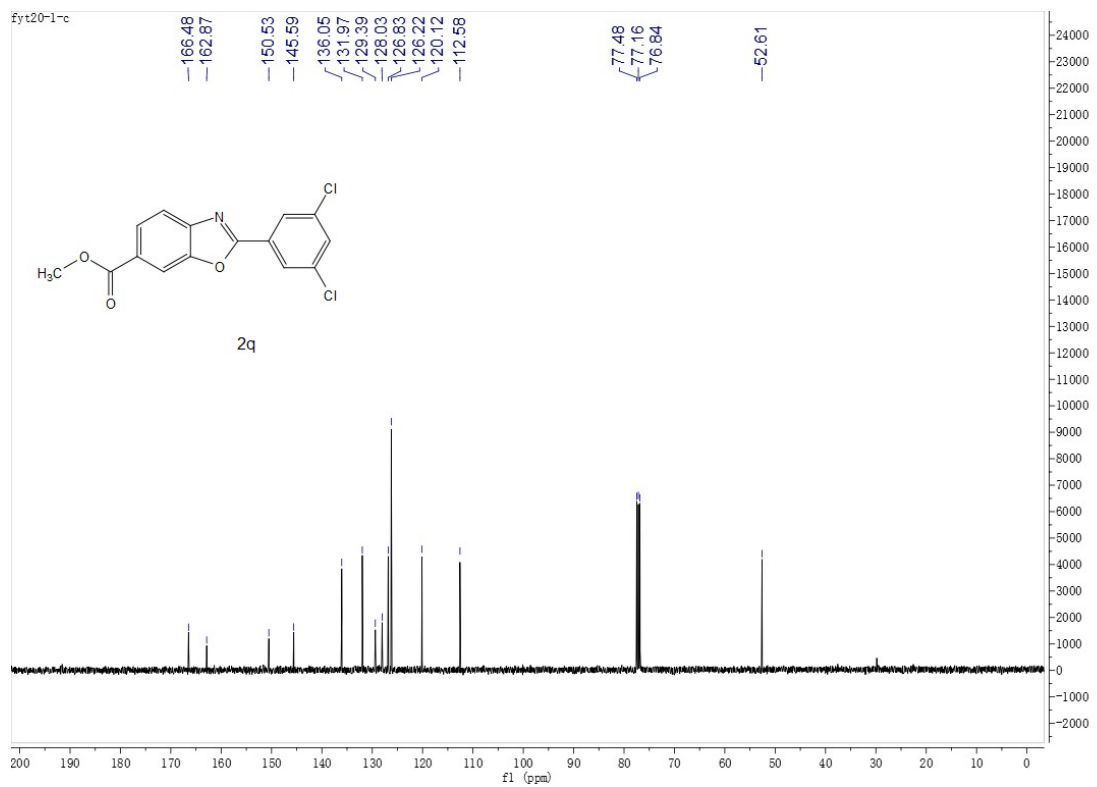

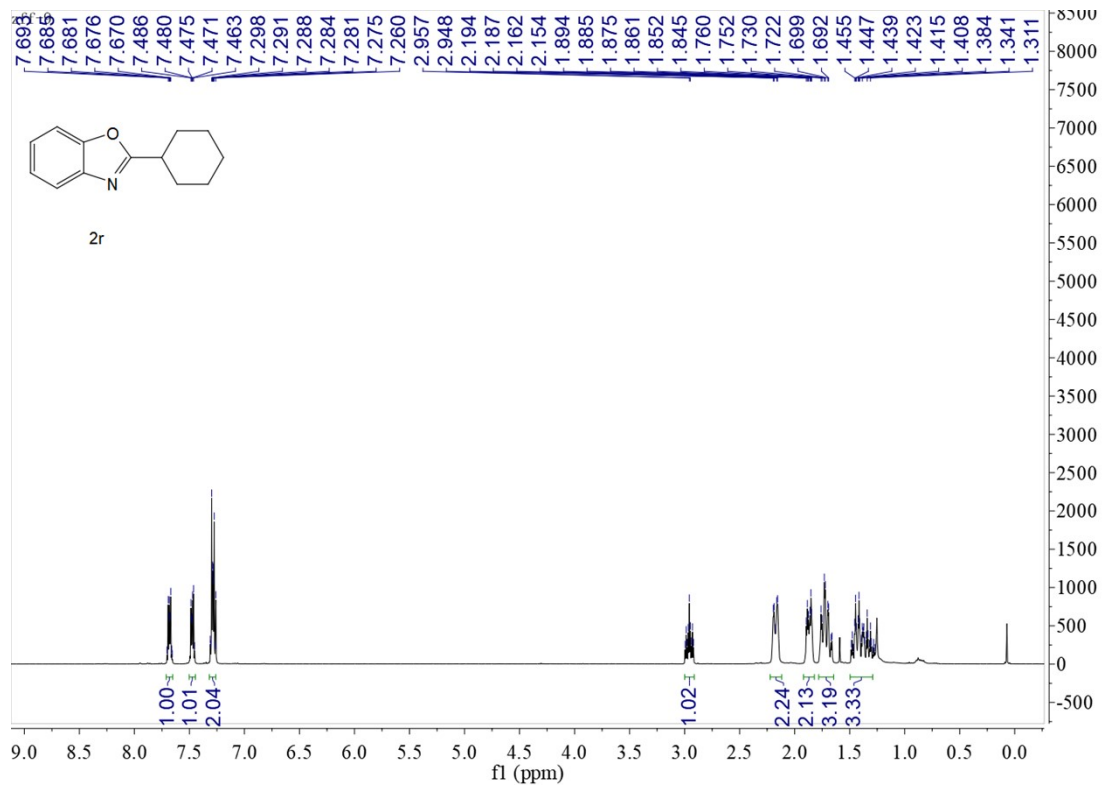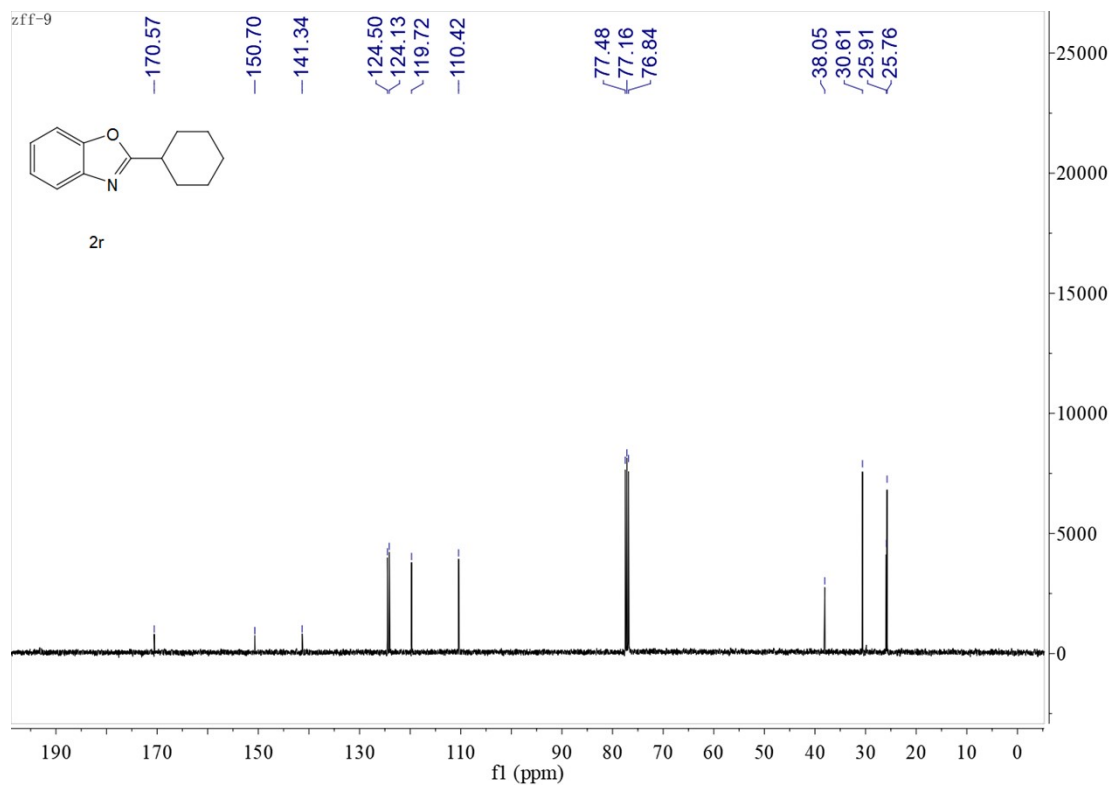

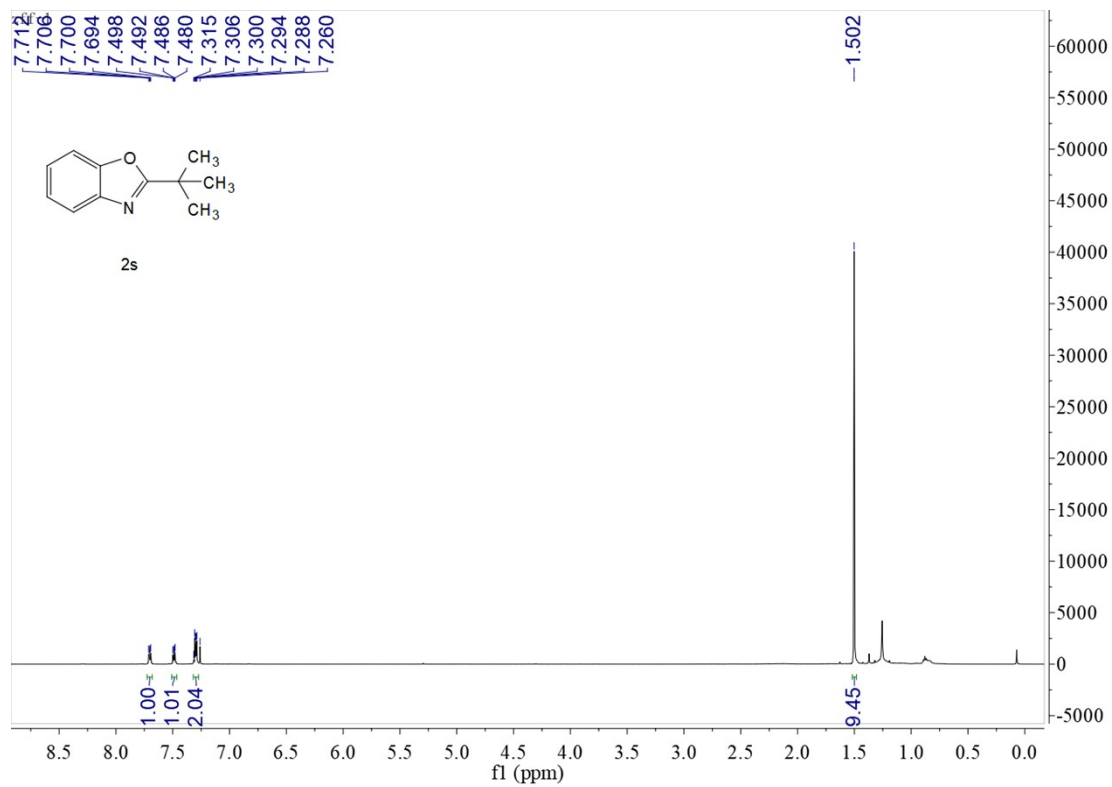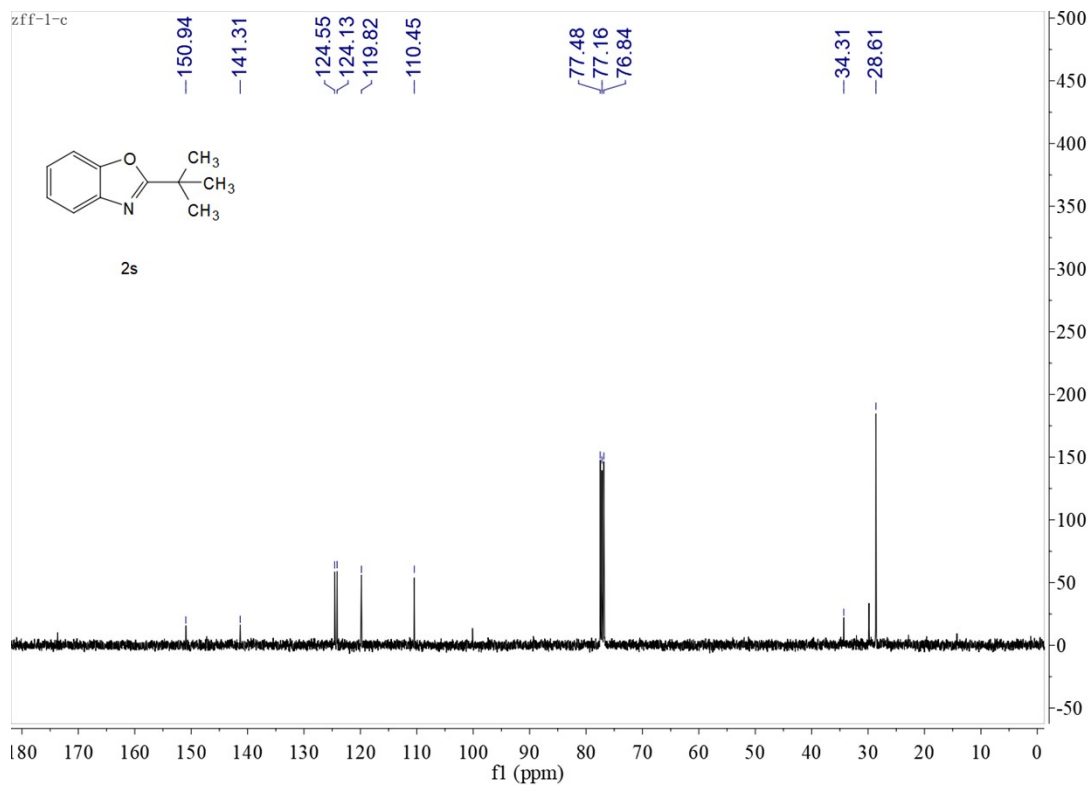

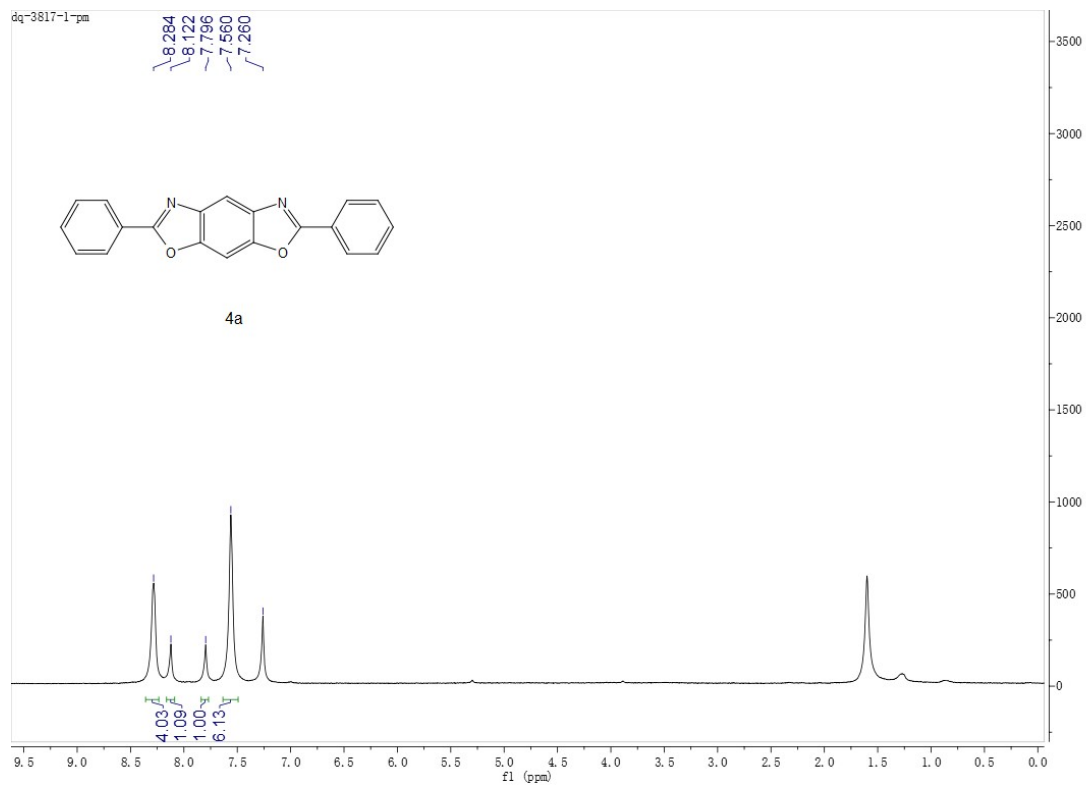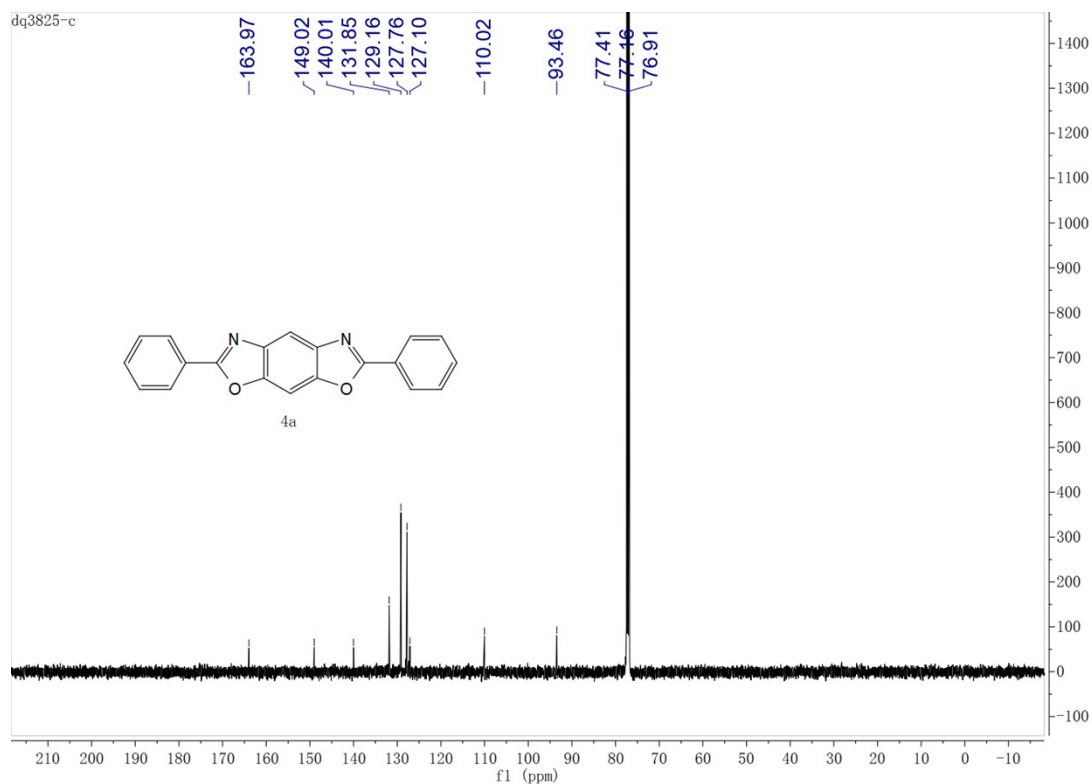

lq3806-1

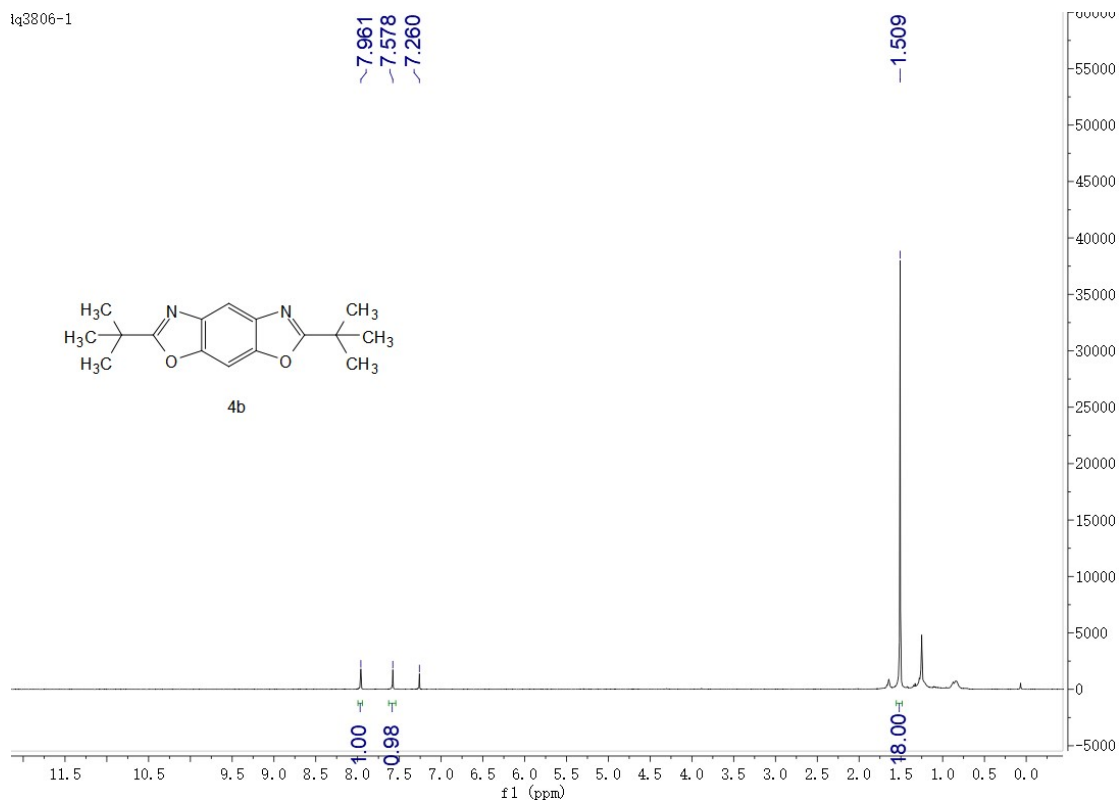

dq3806-1-c

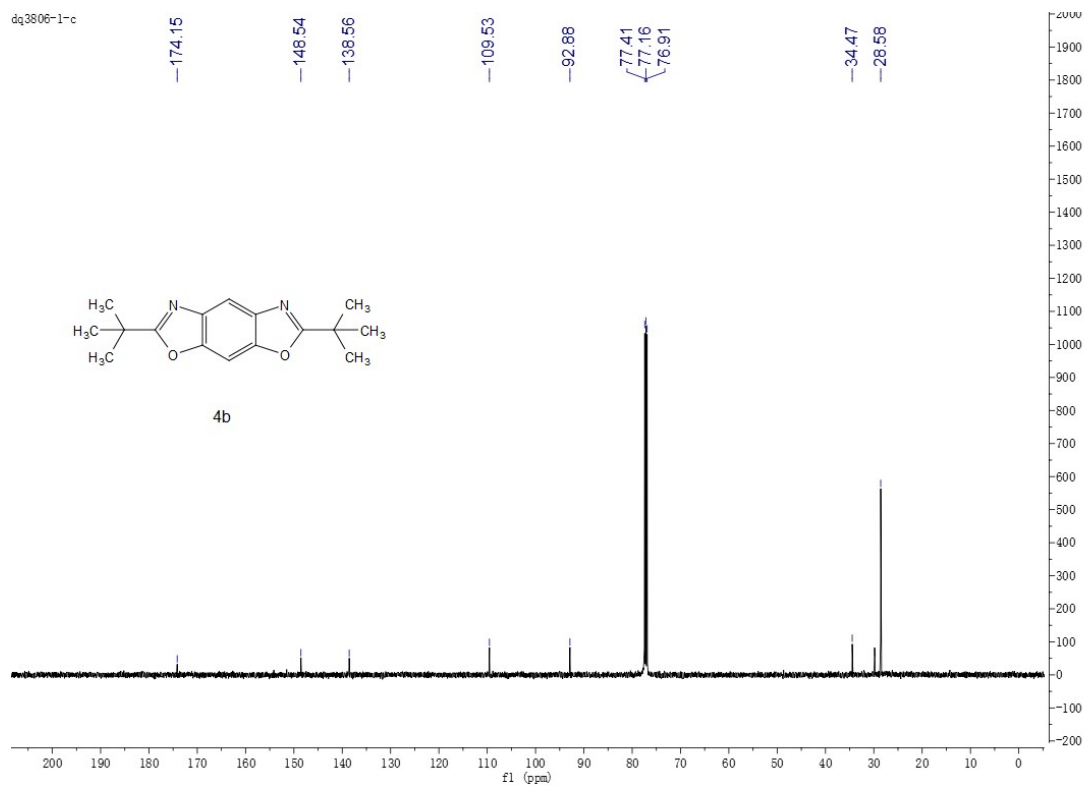

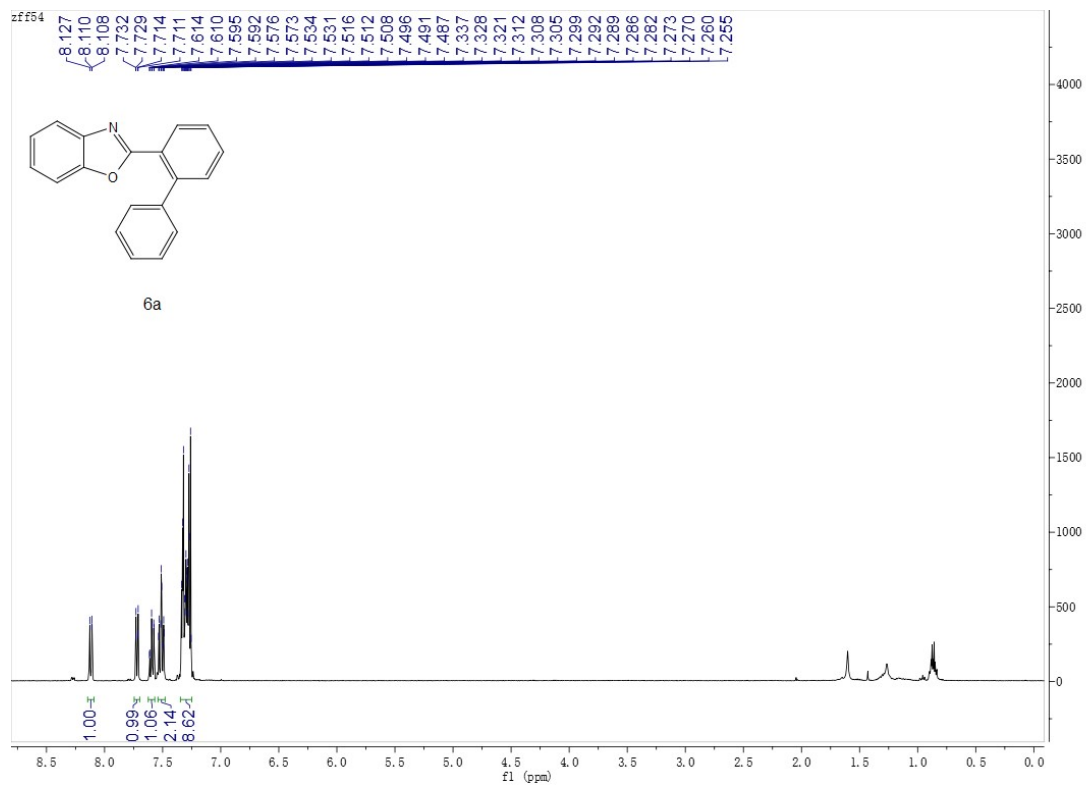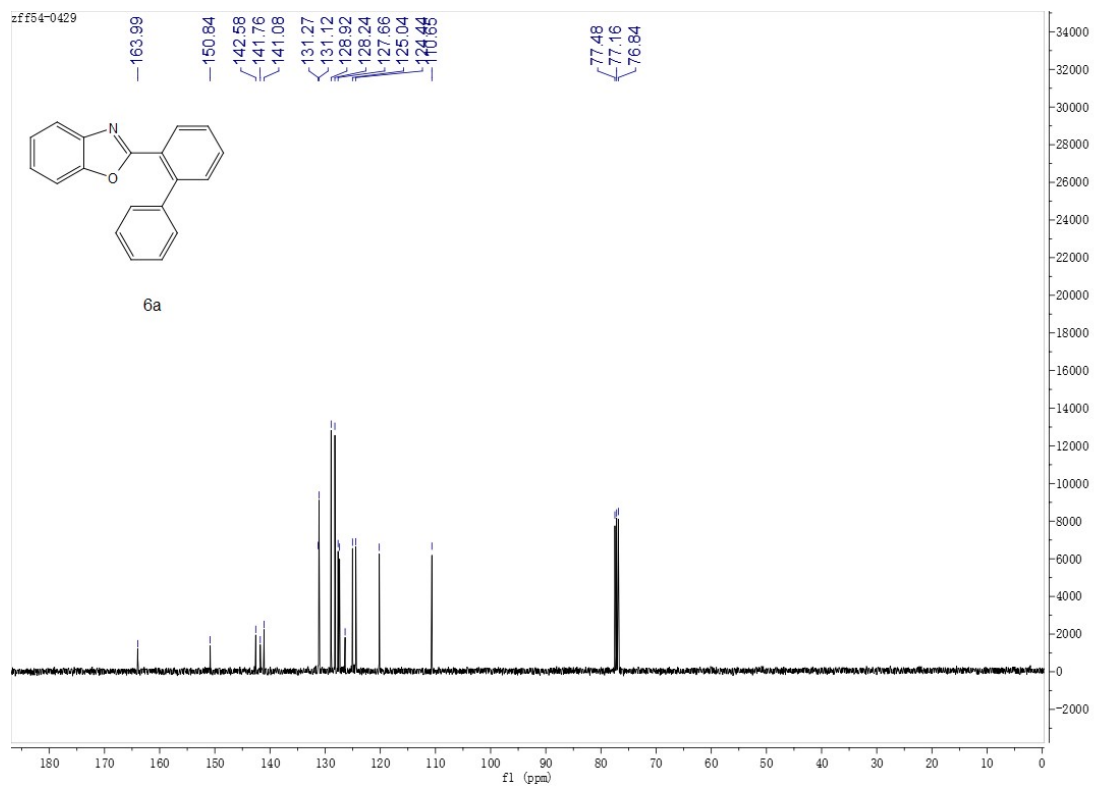

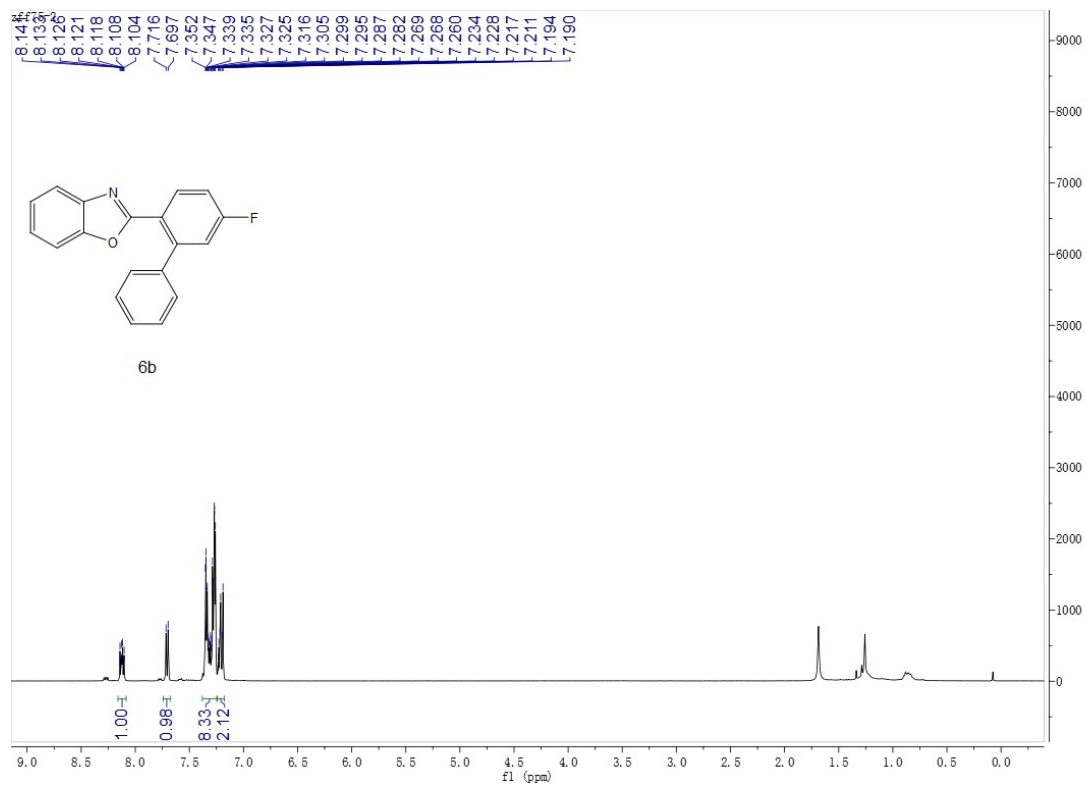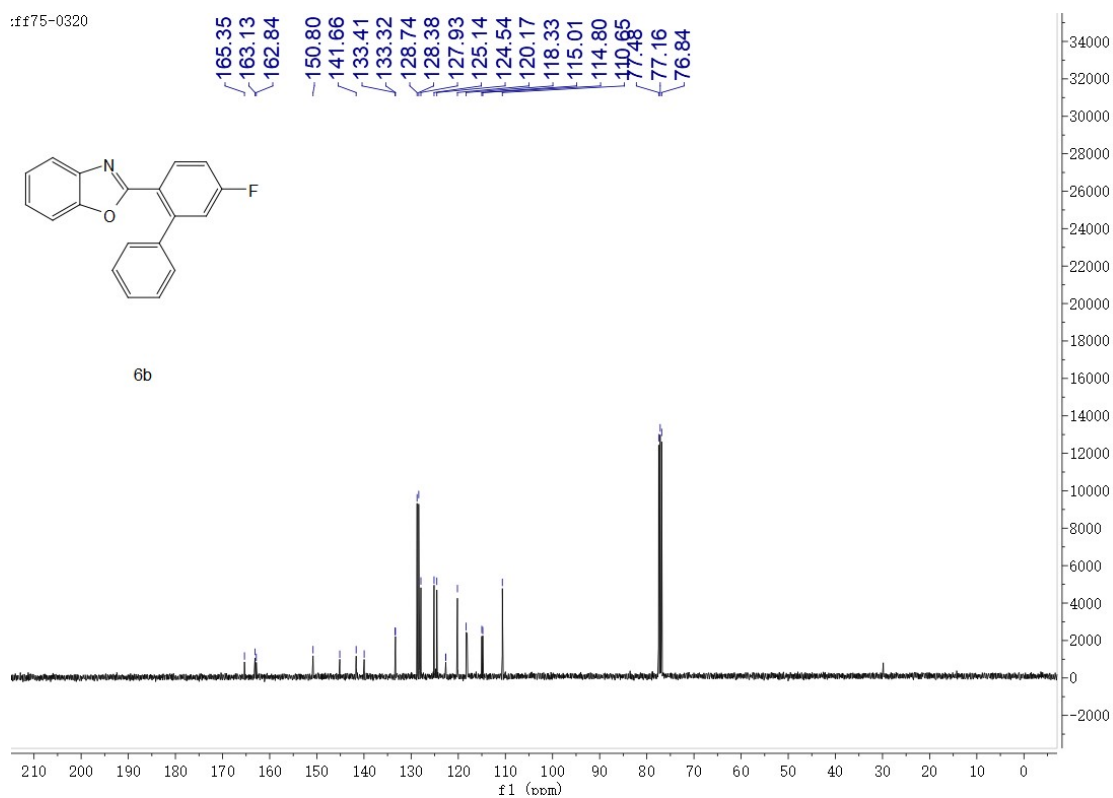



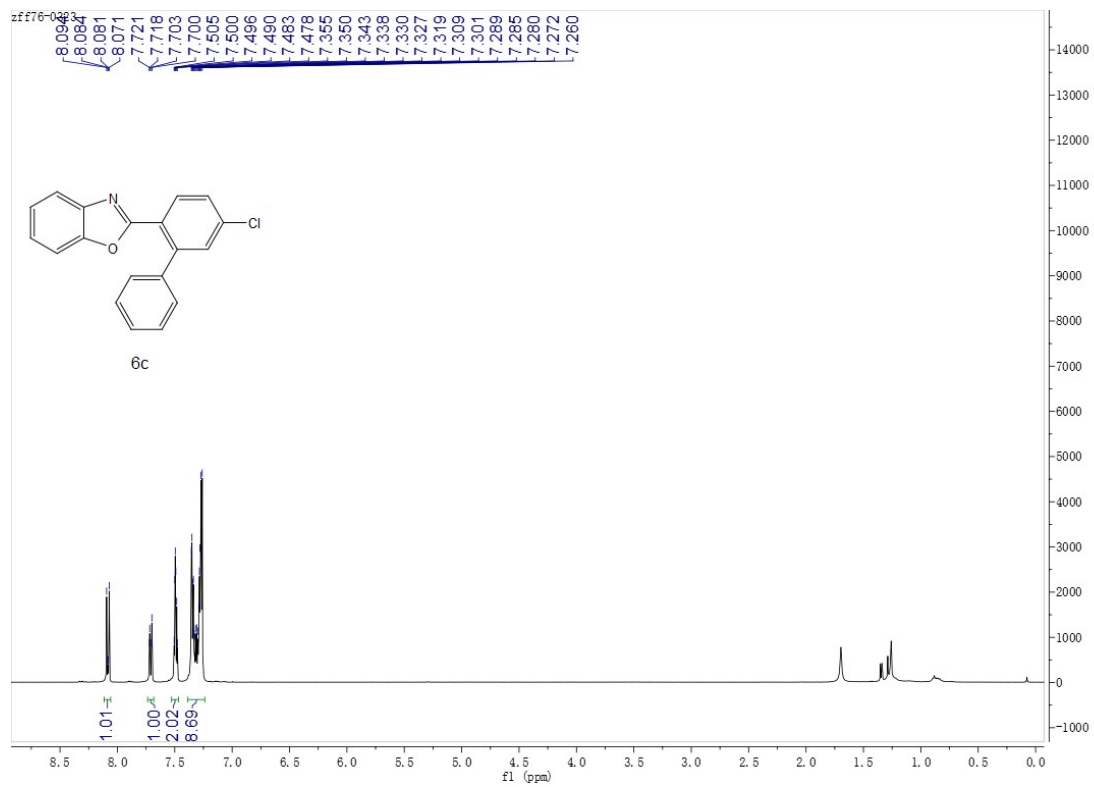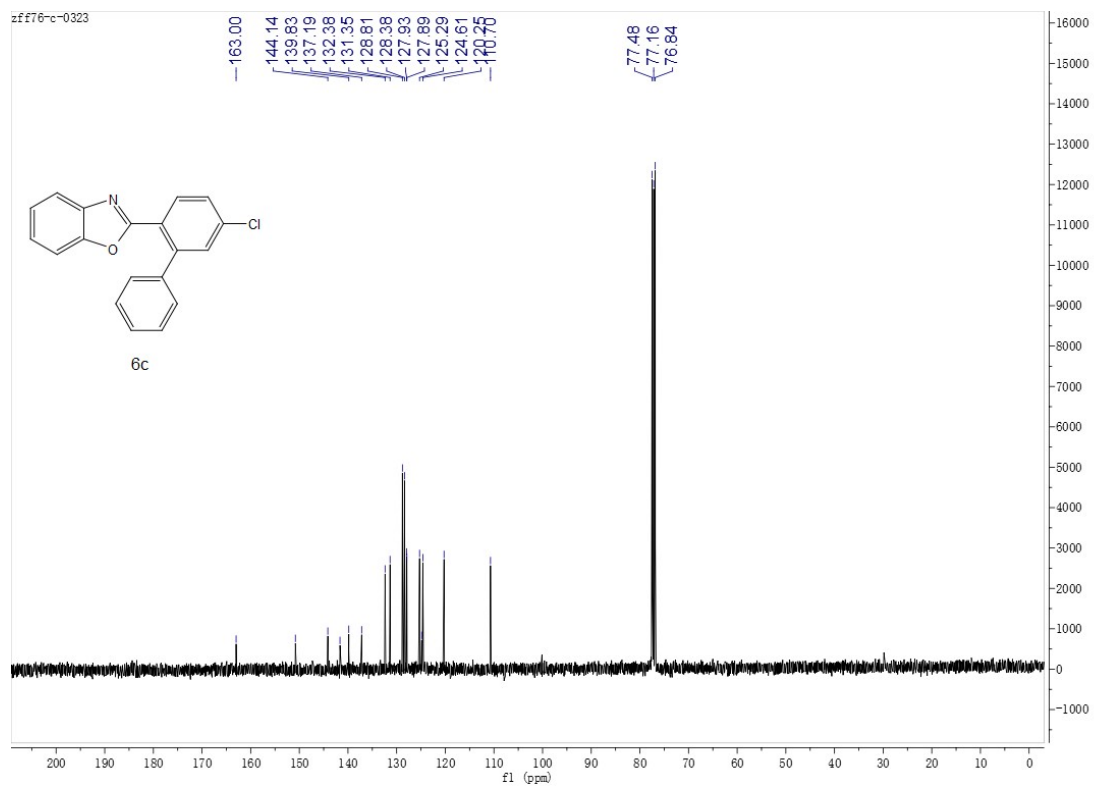

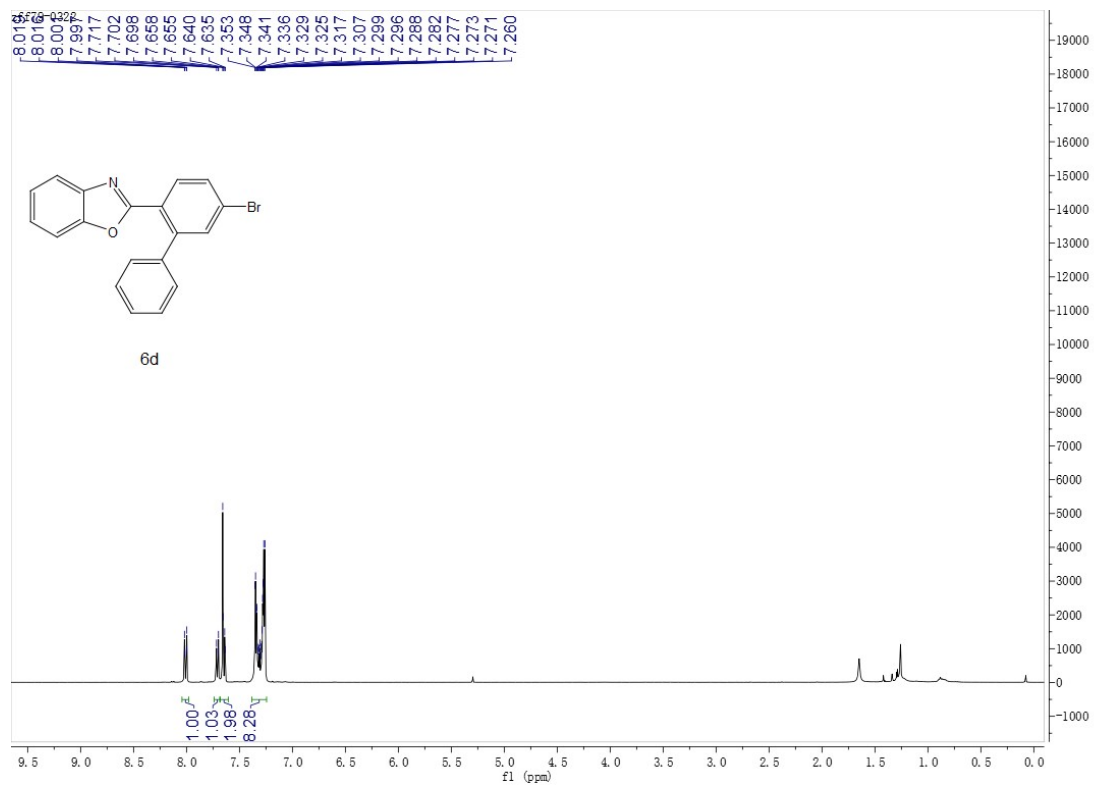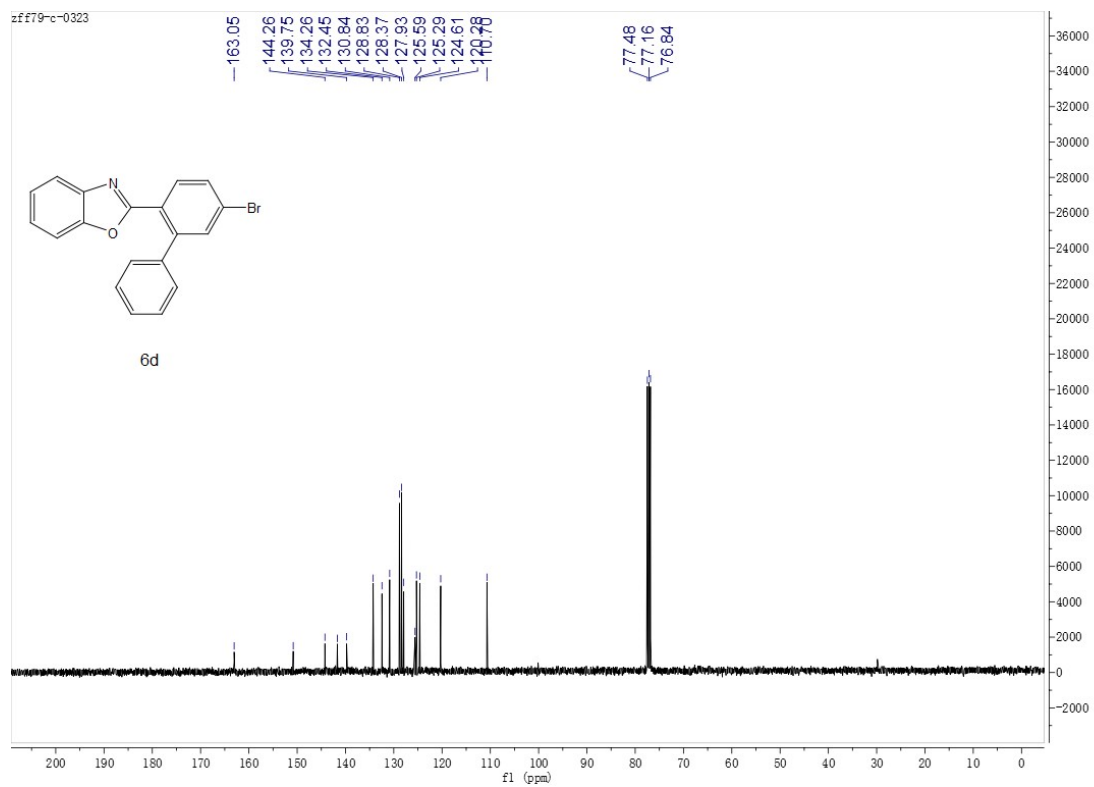

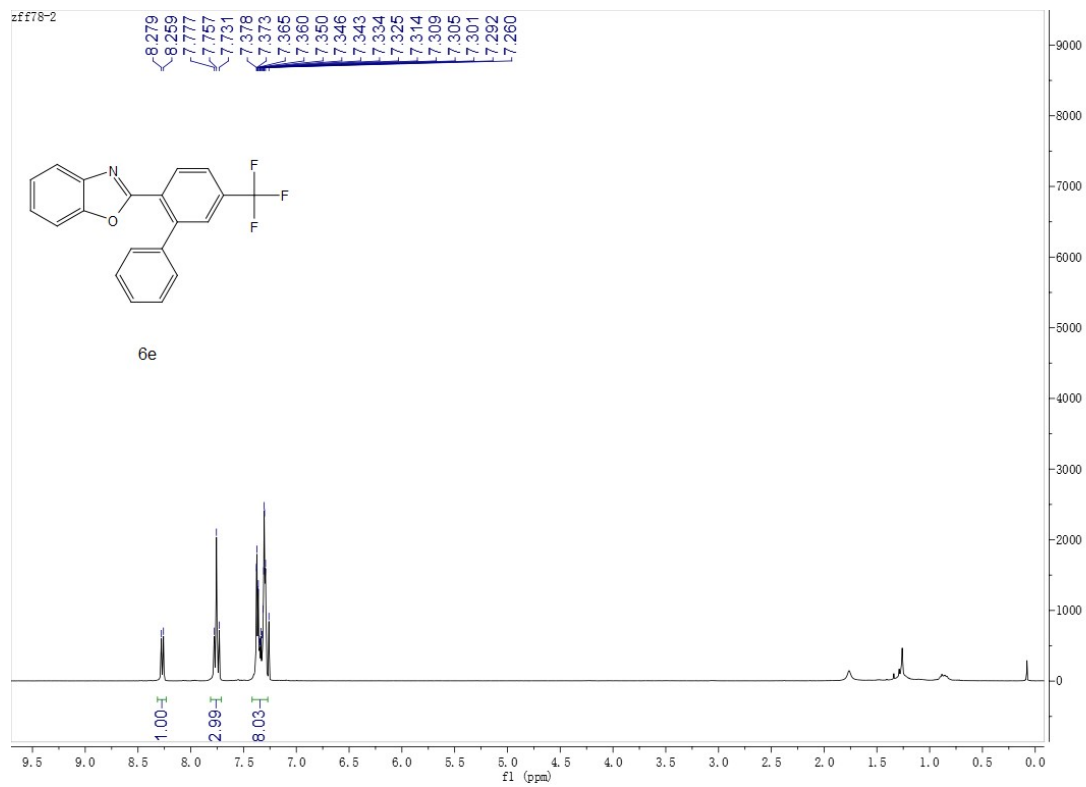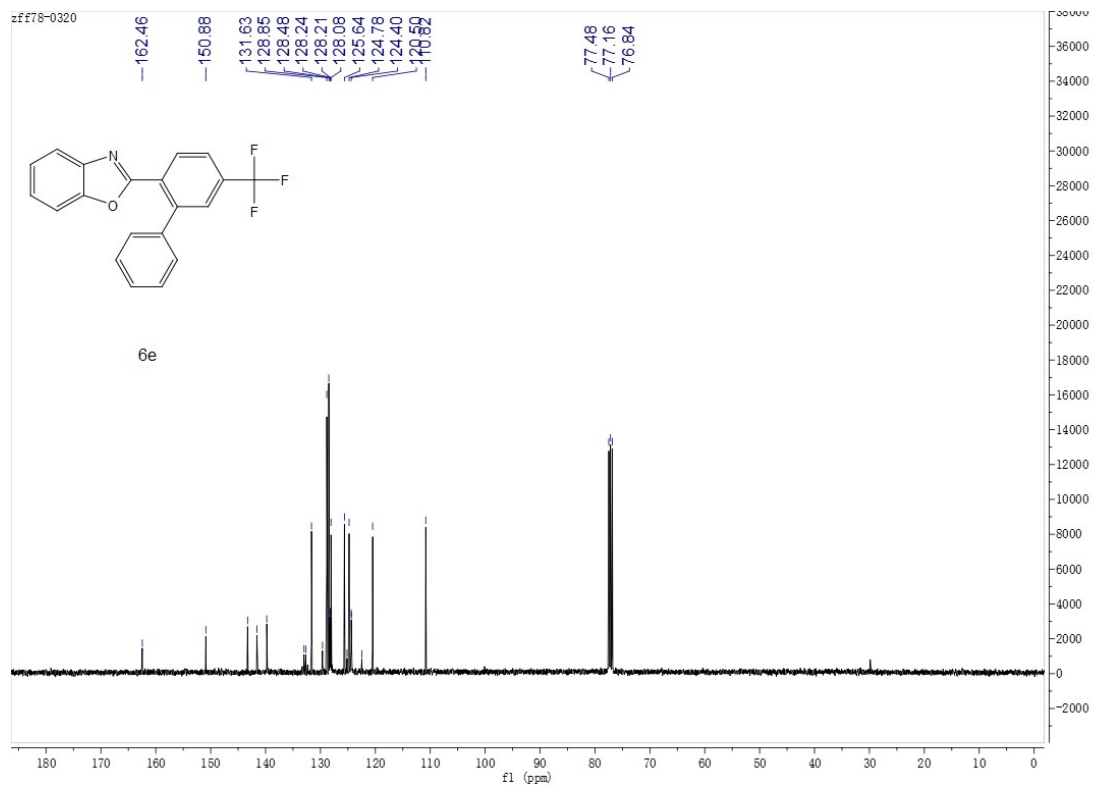

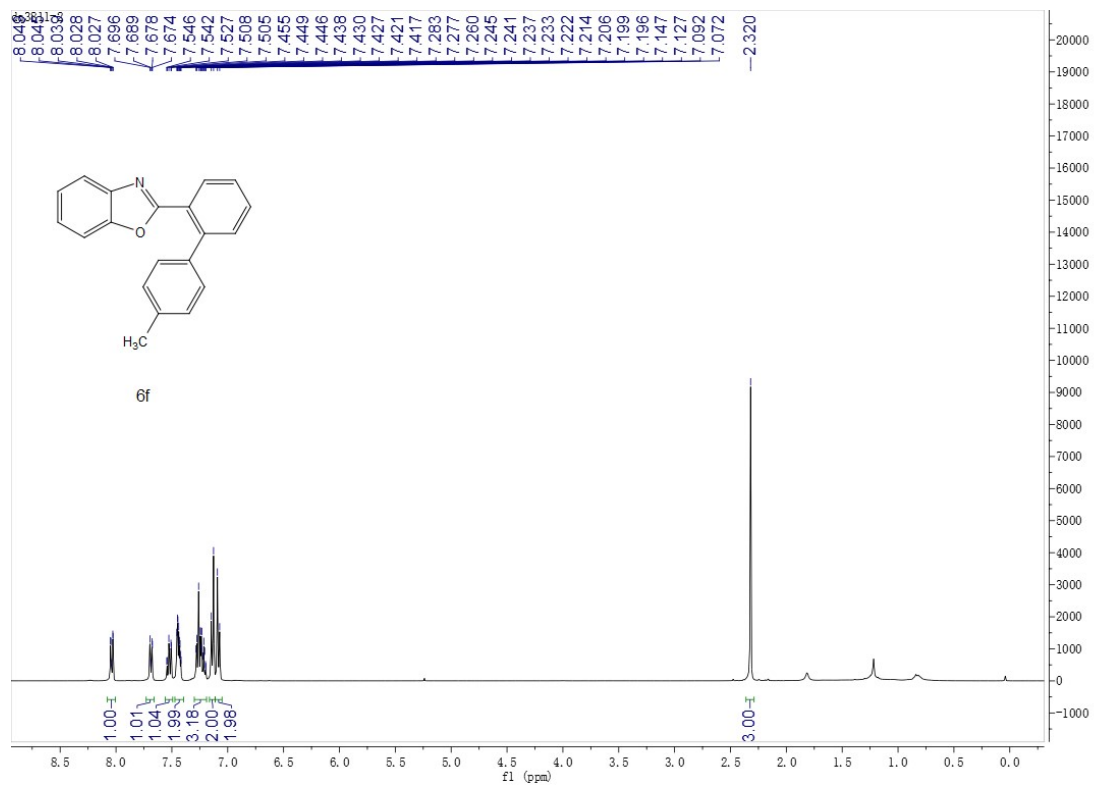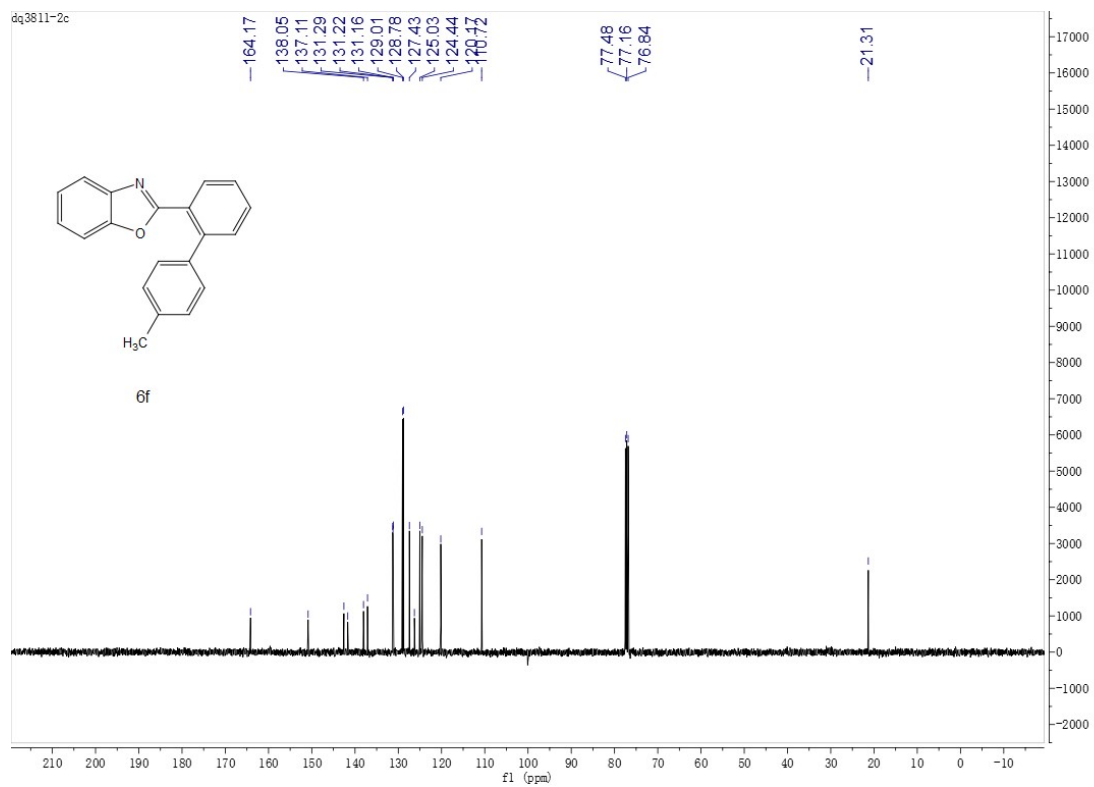

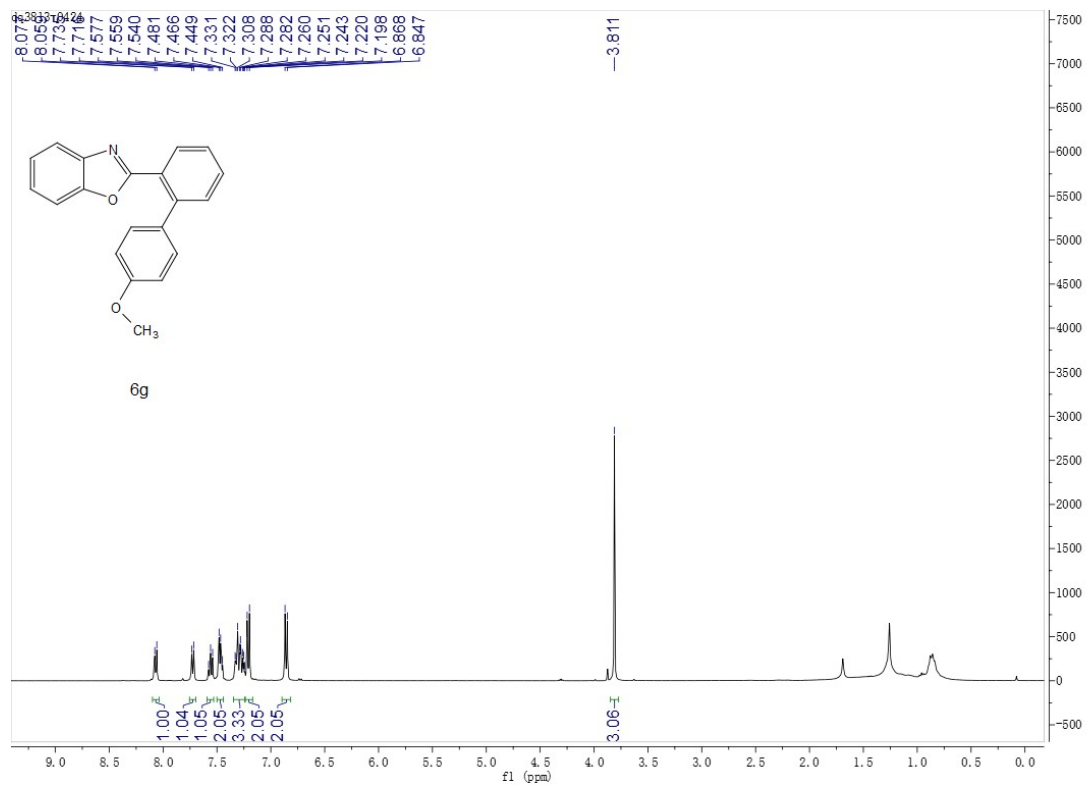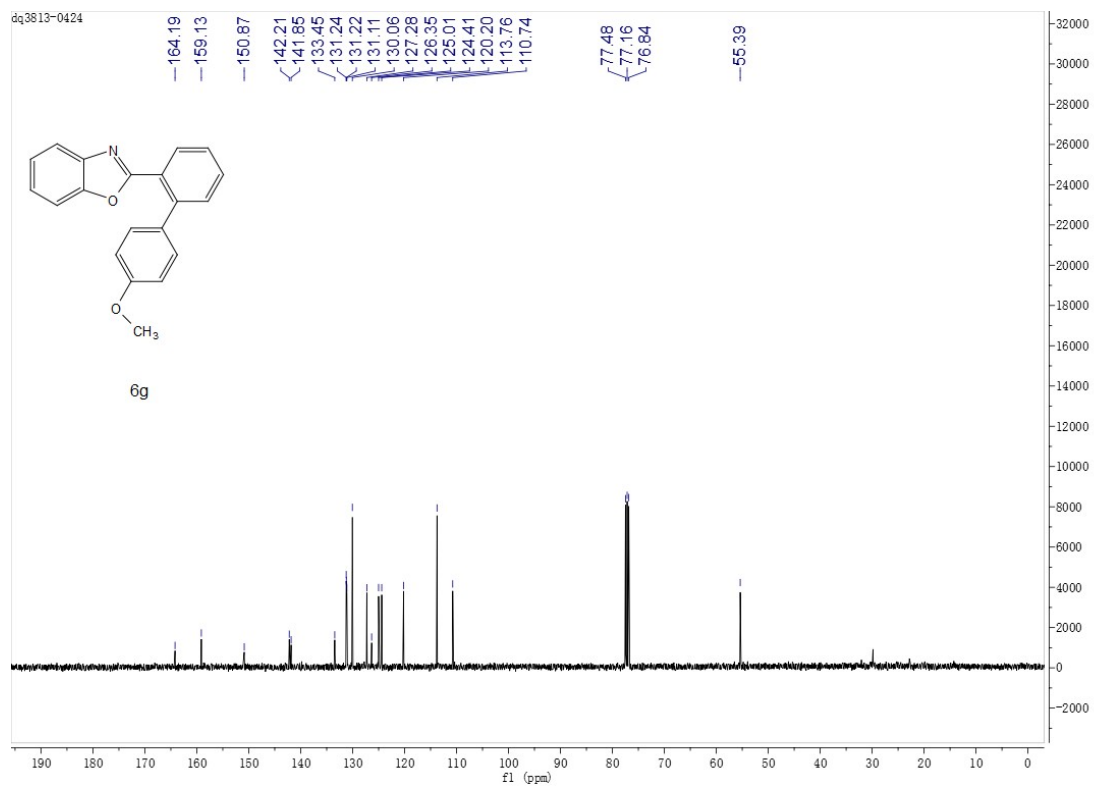

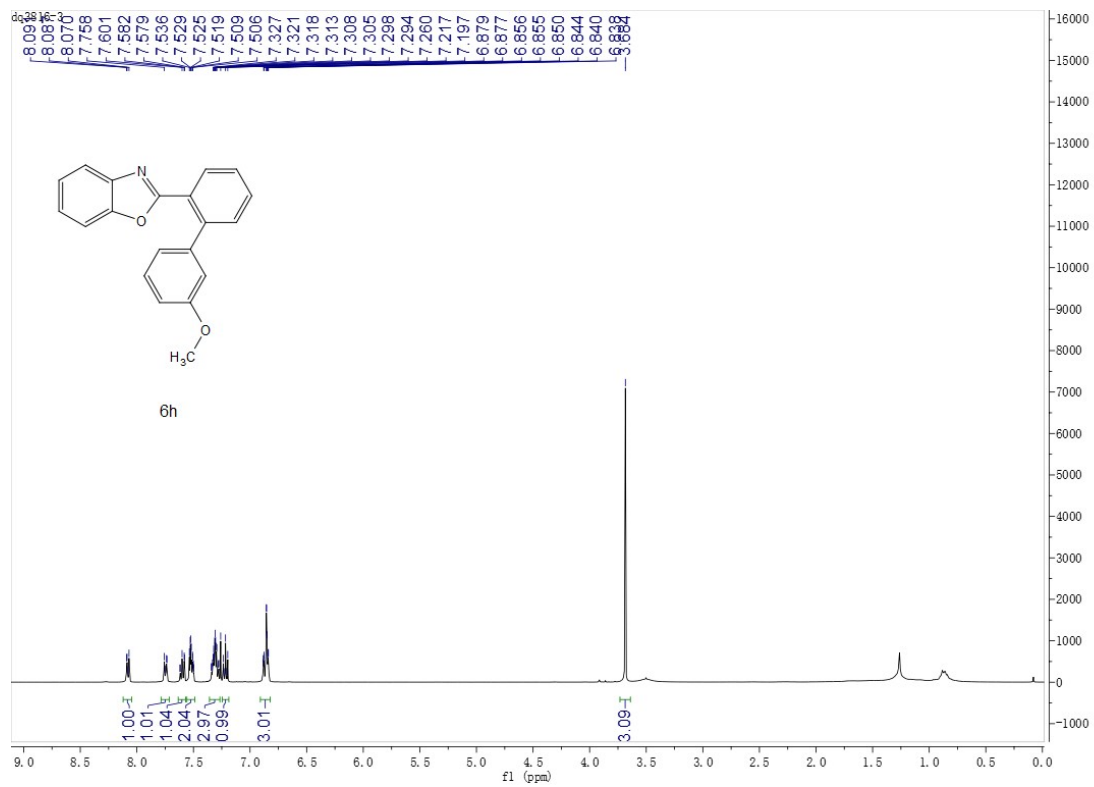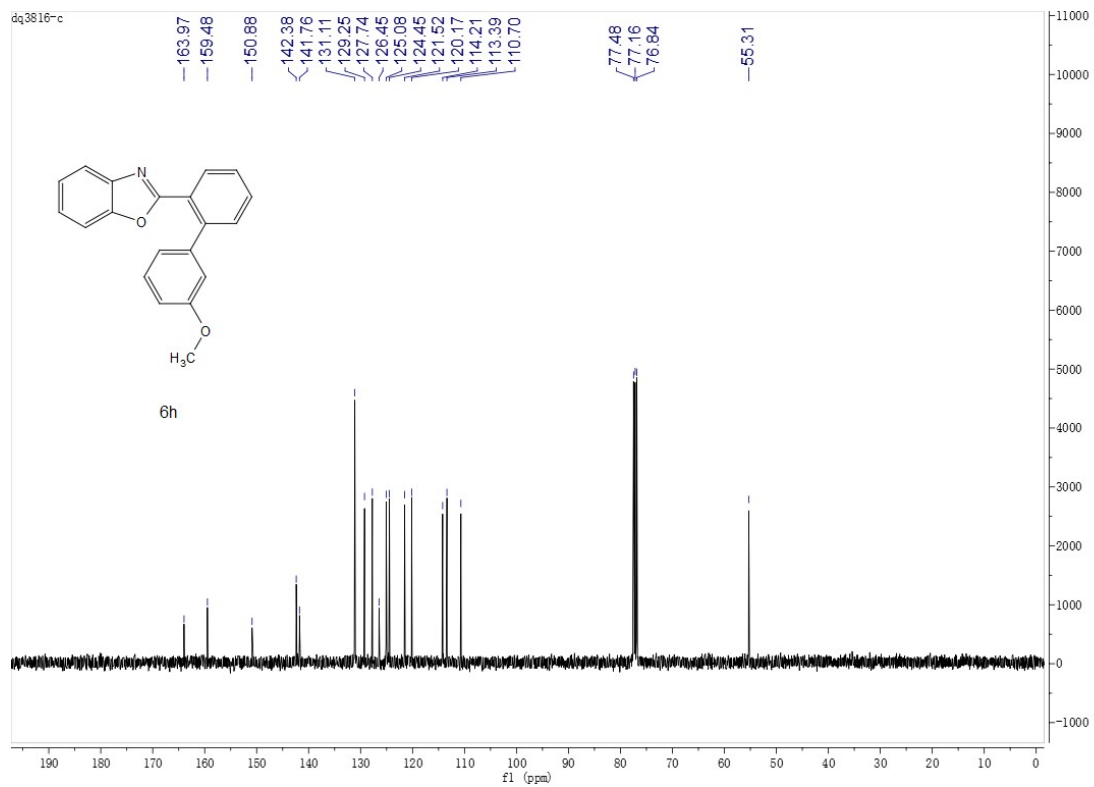

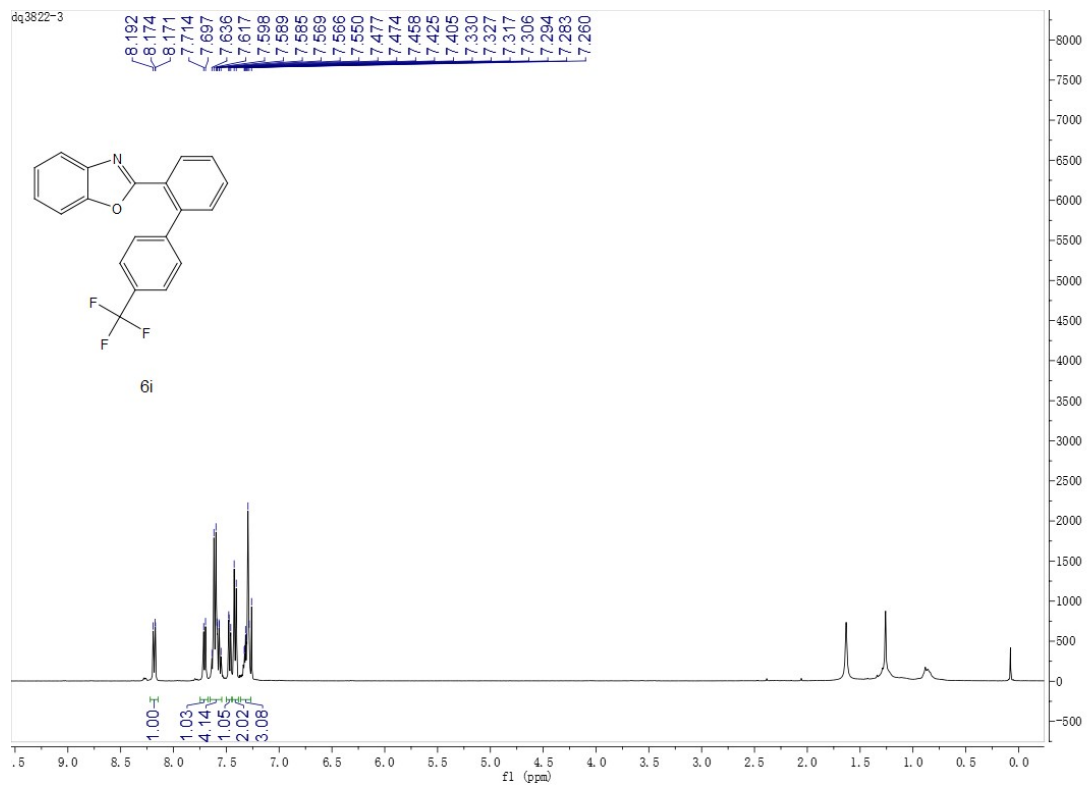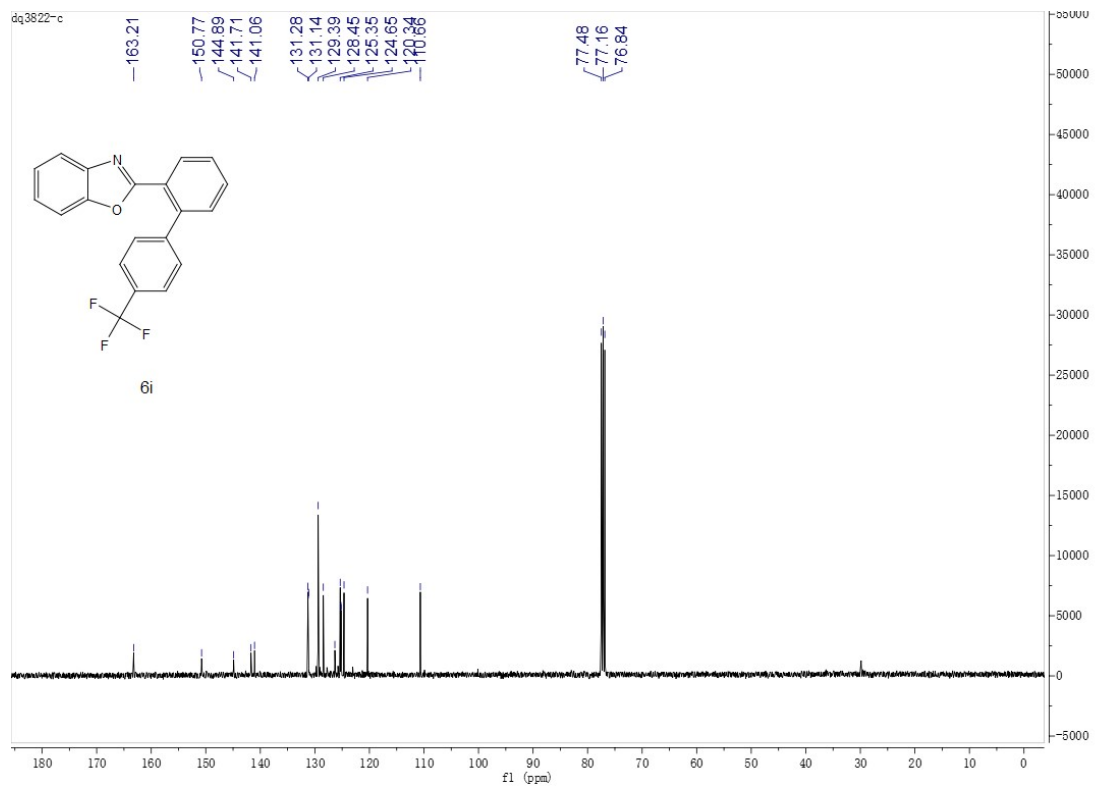

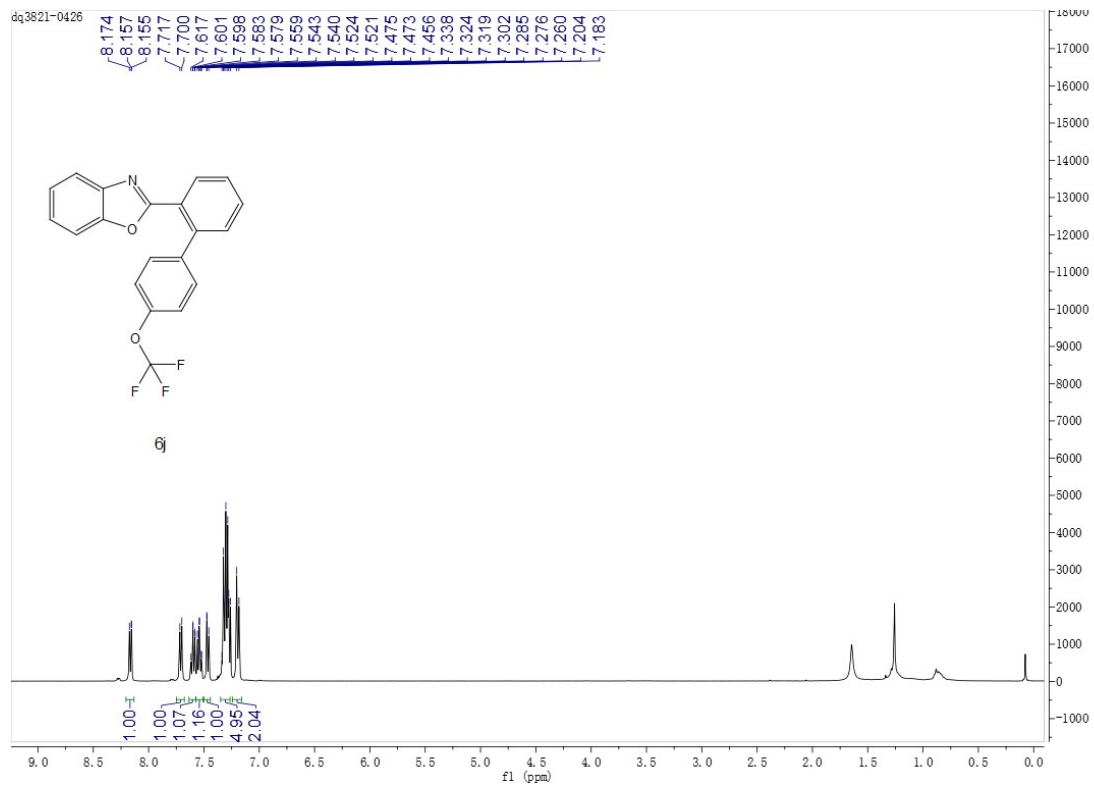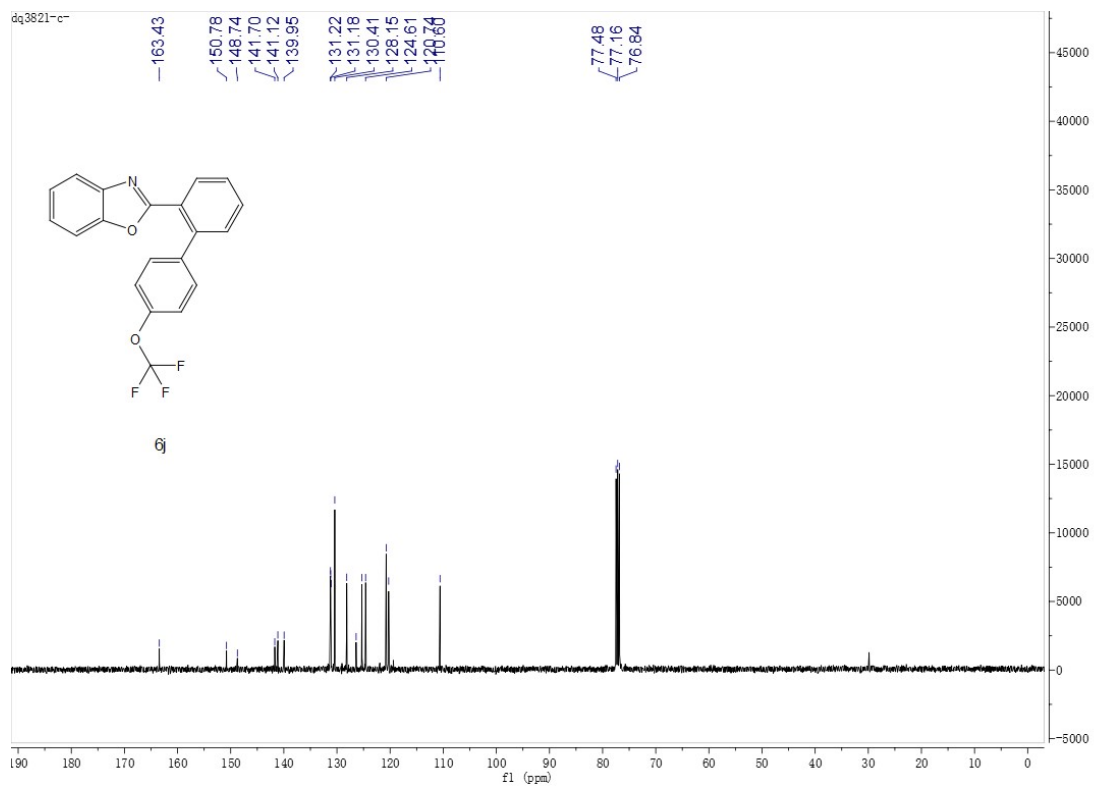



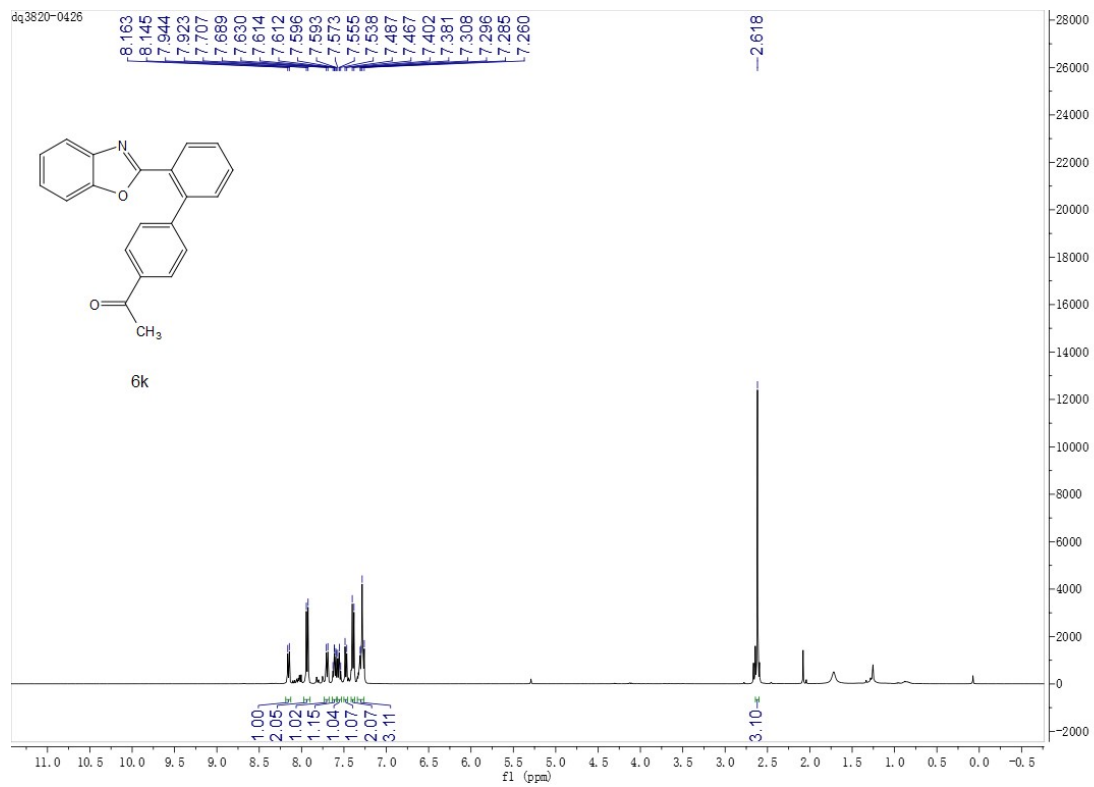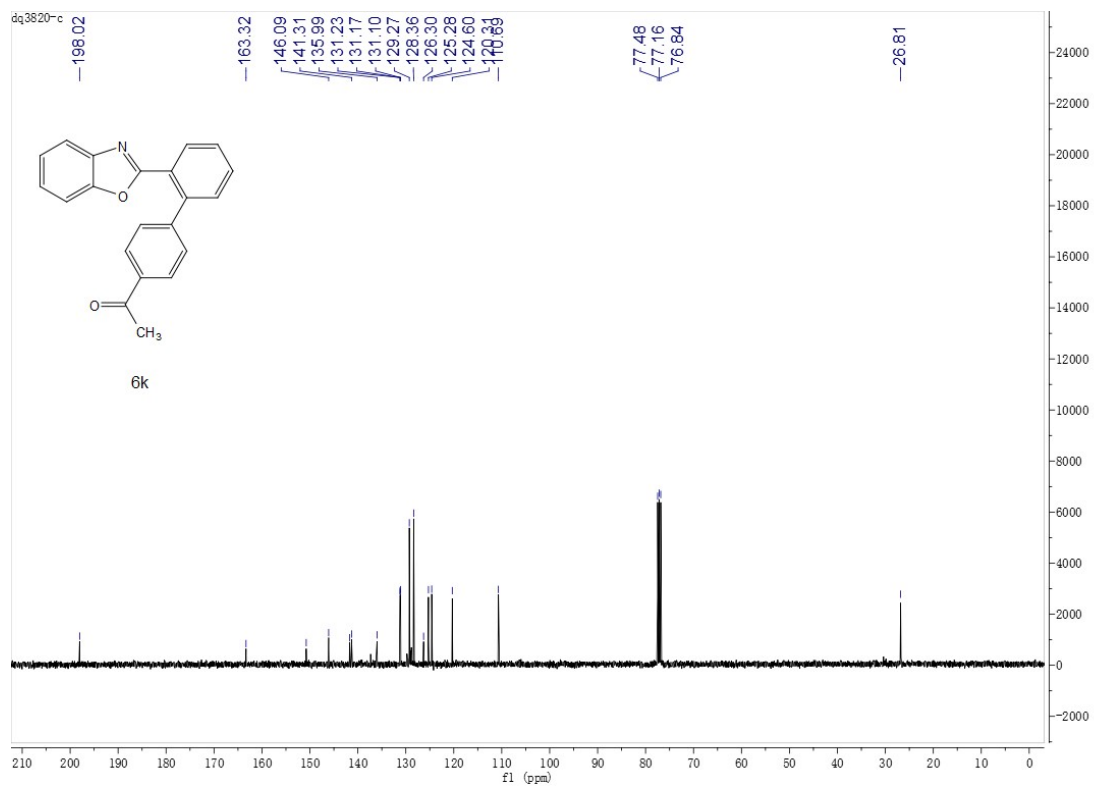

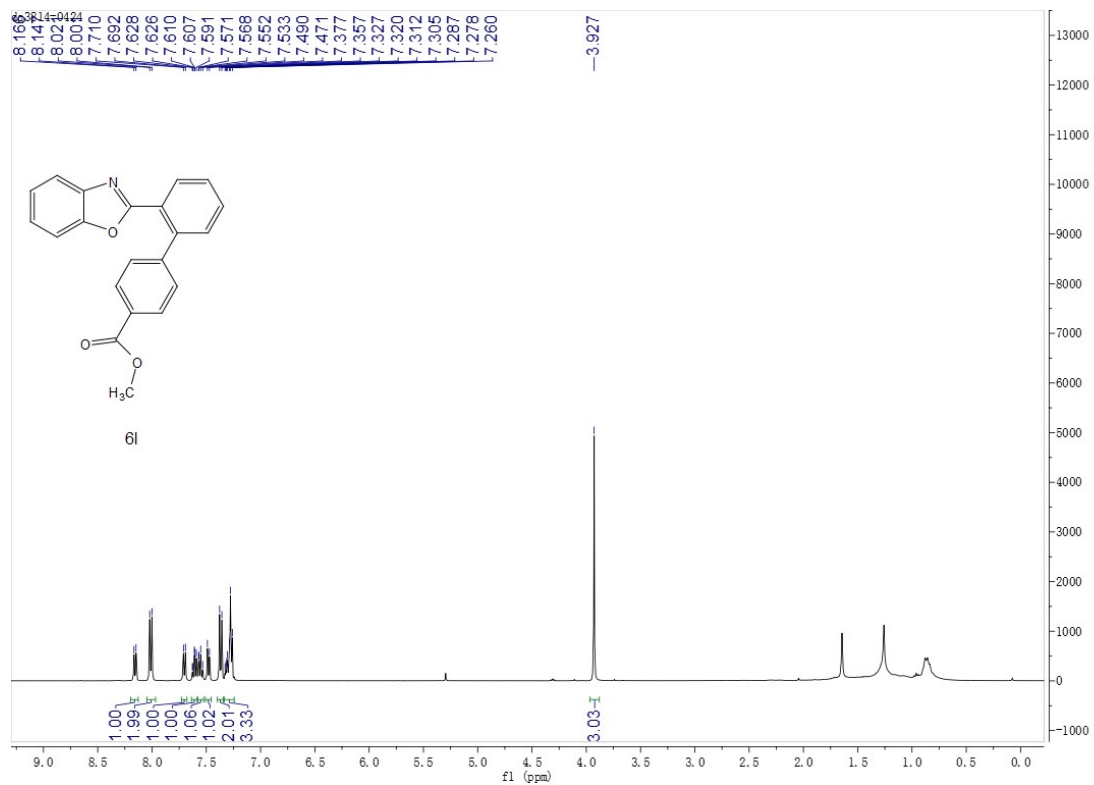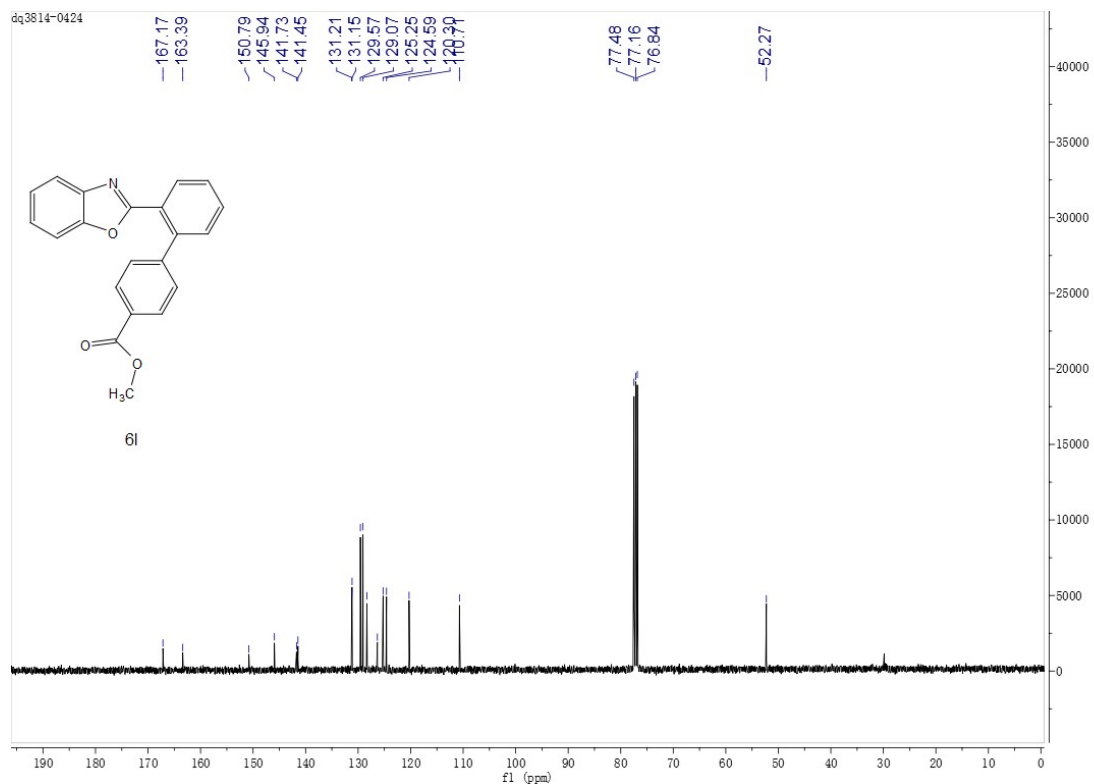

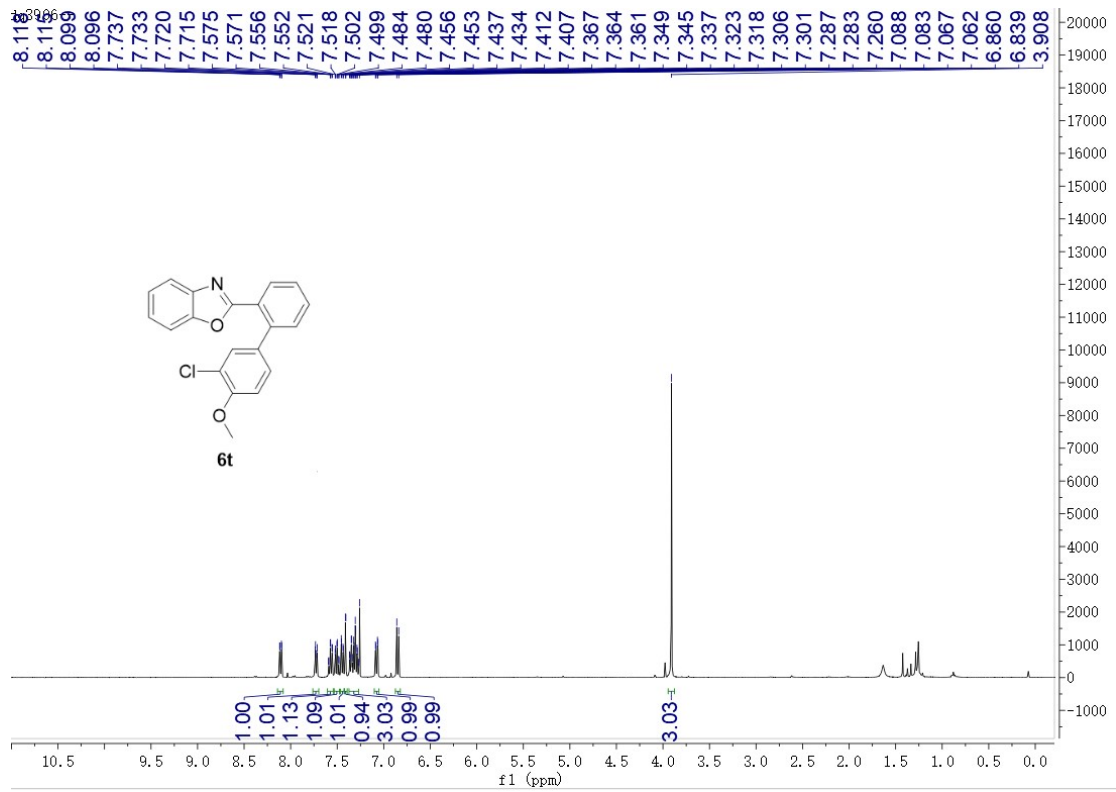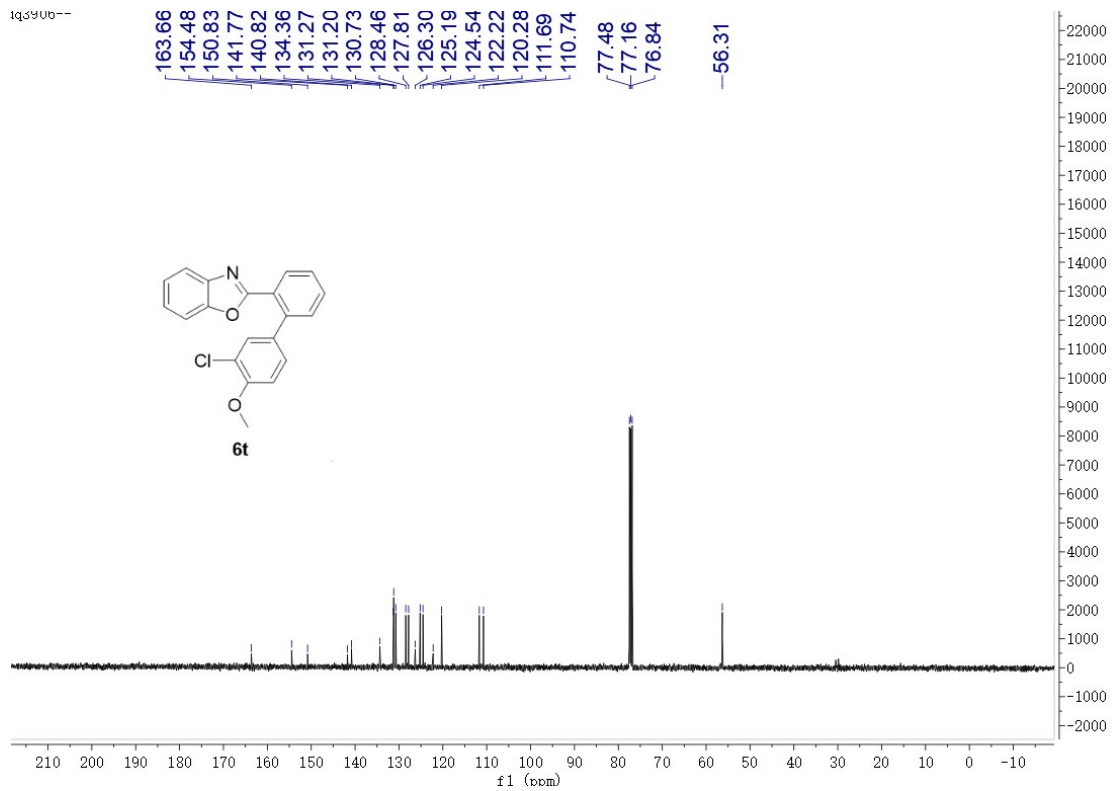

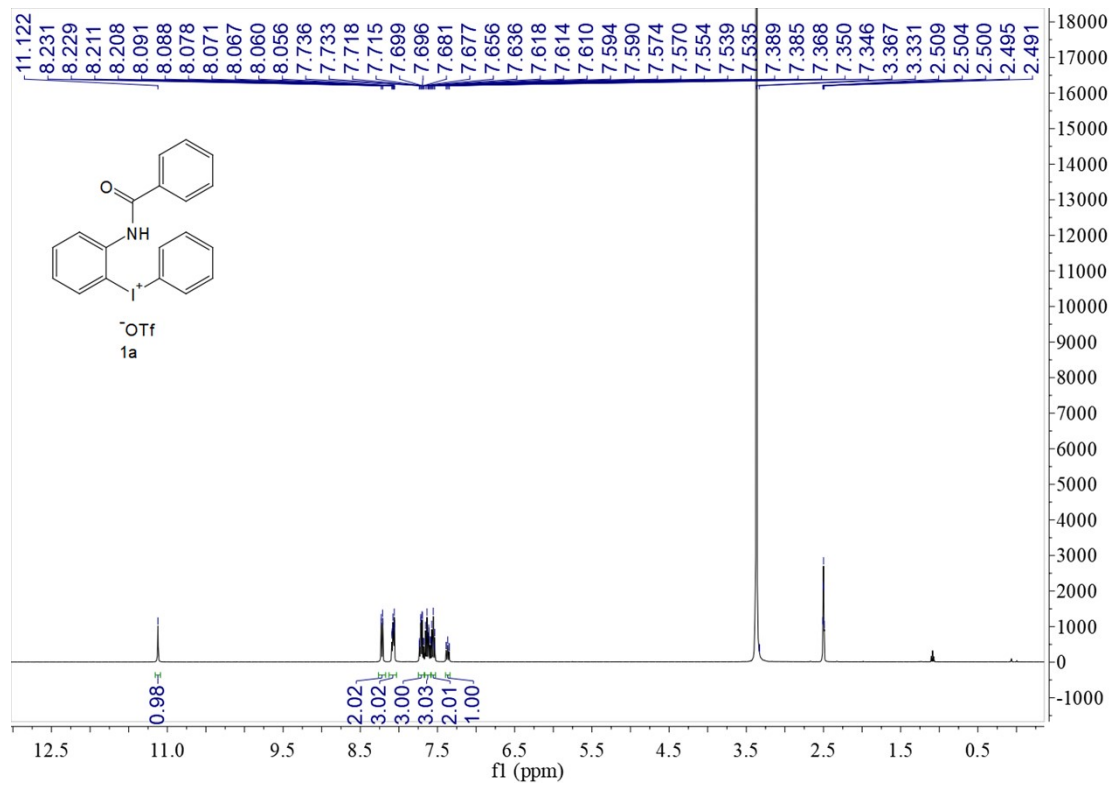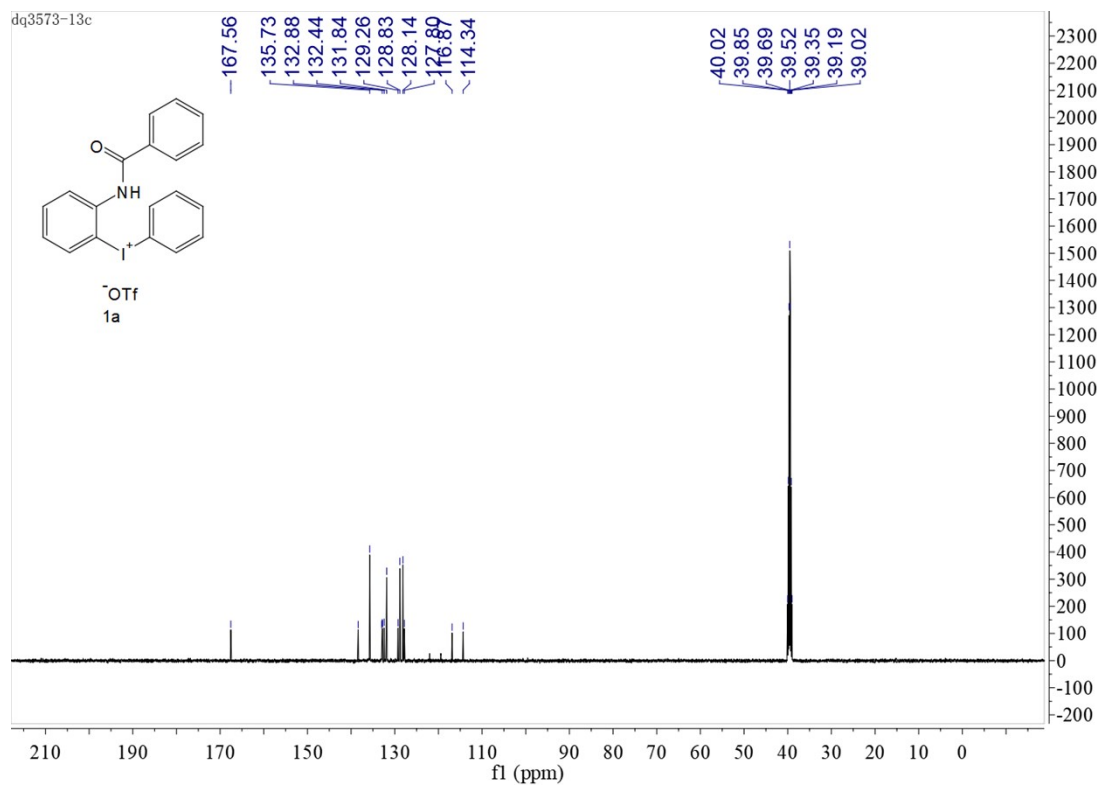

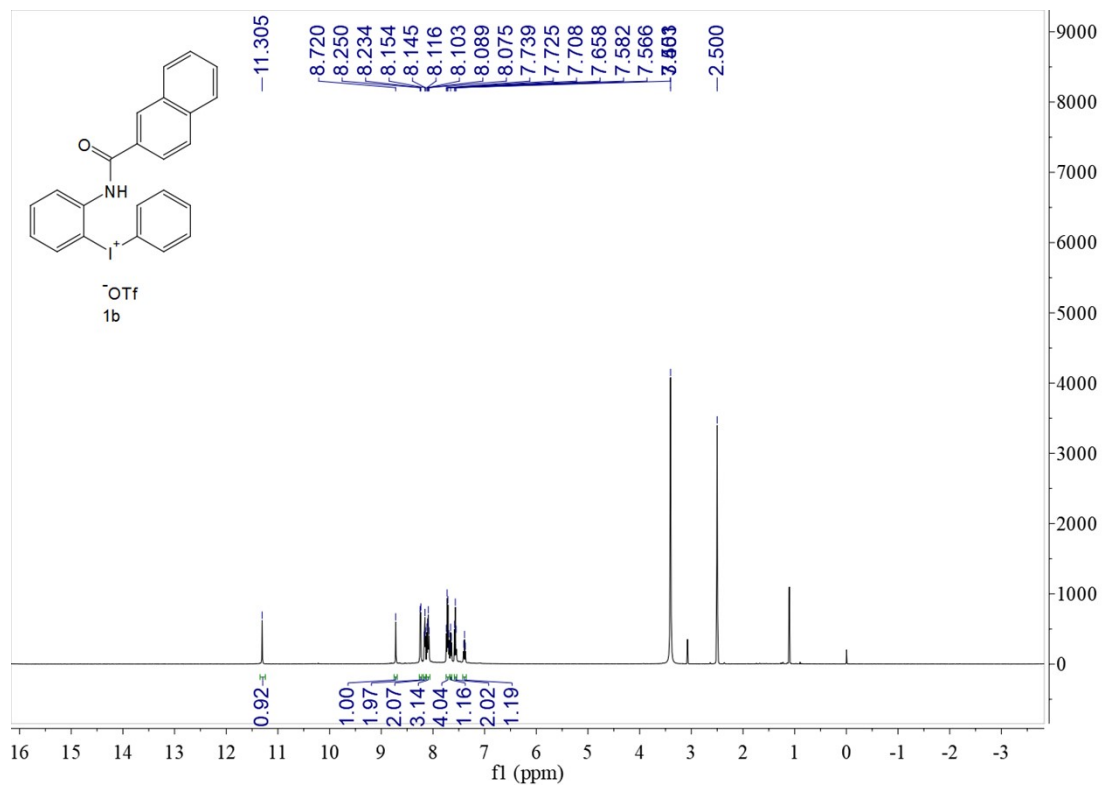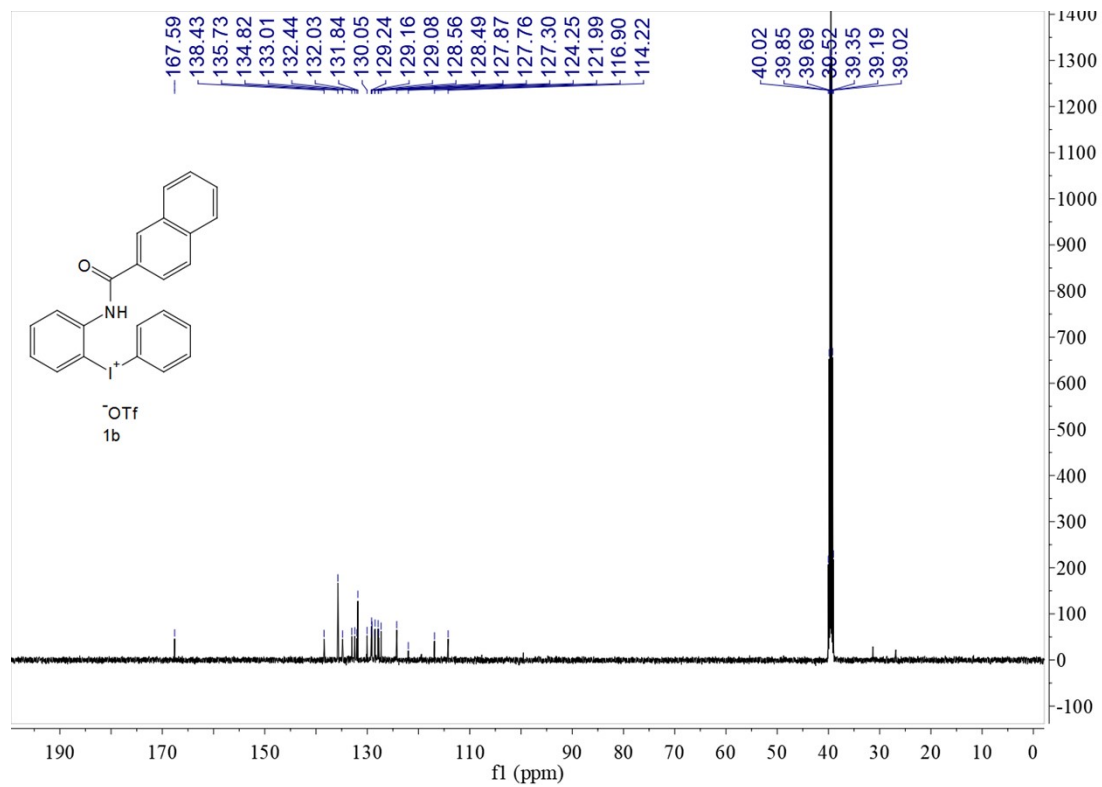

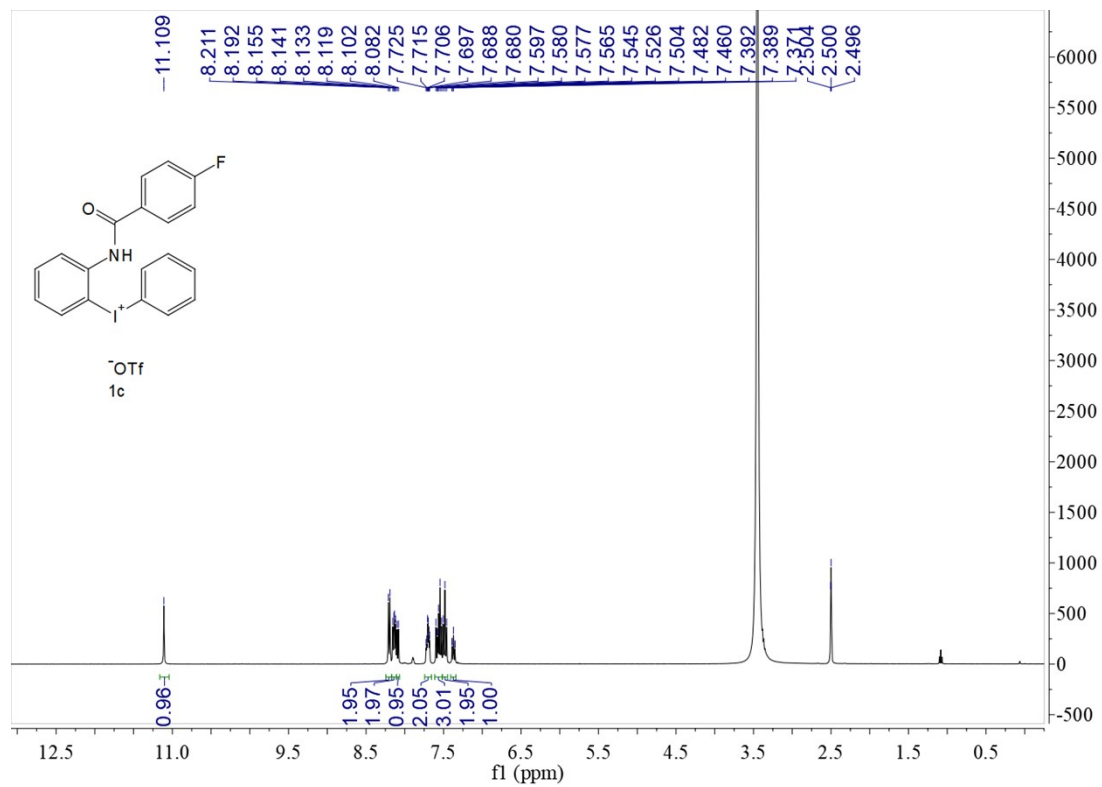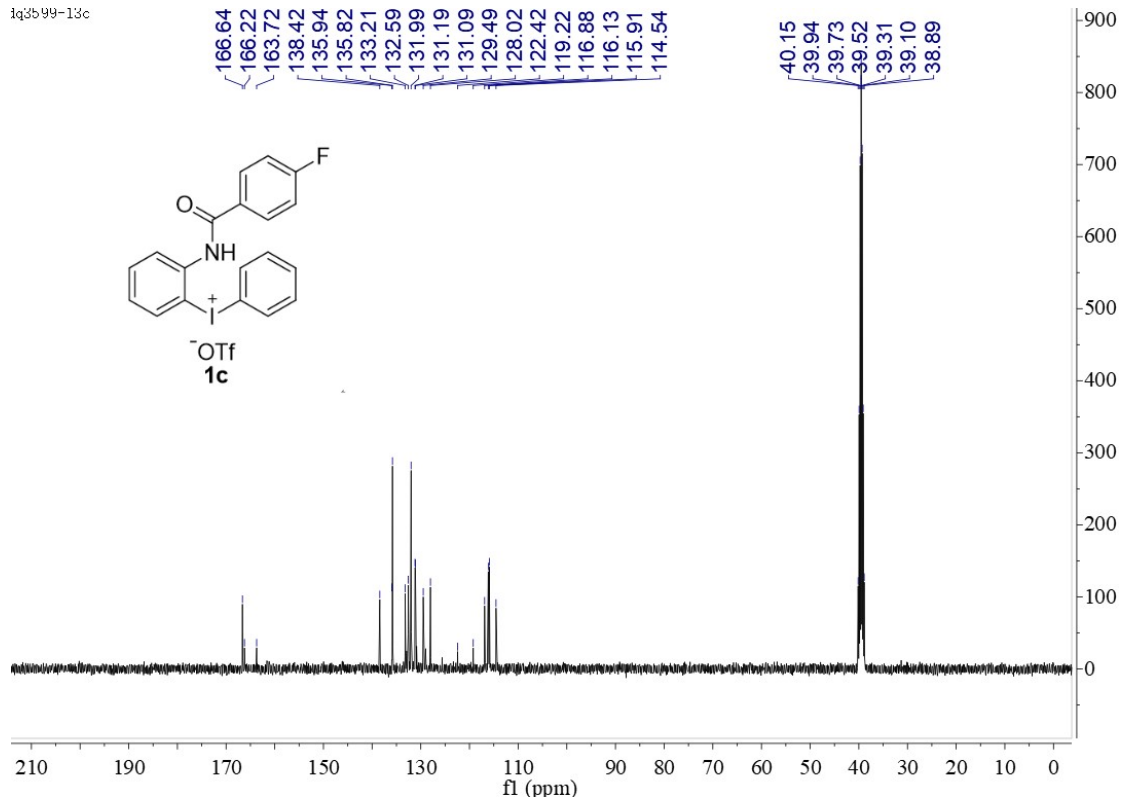

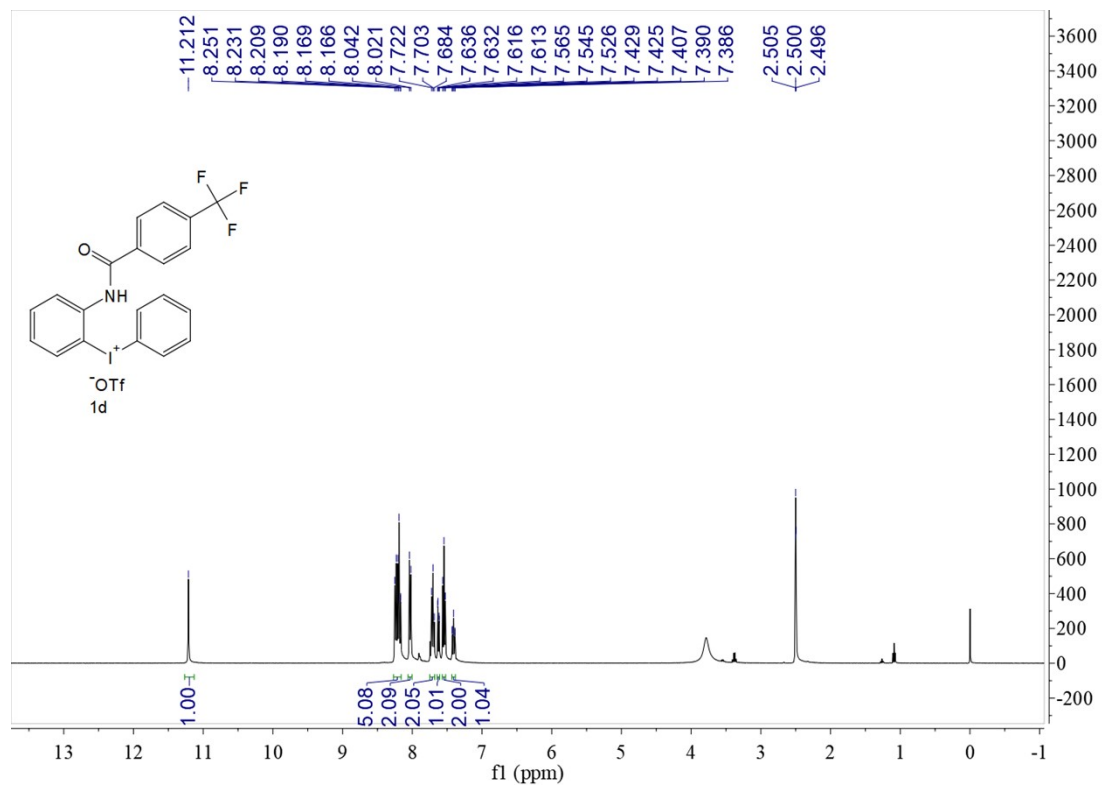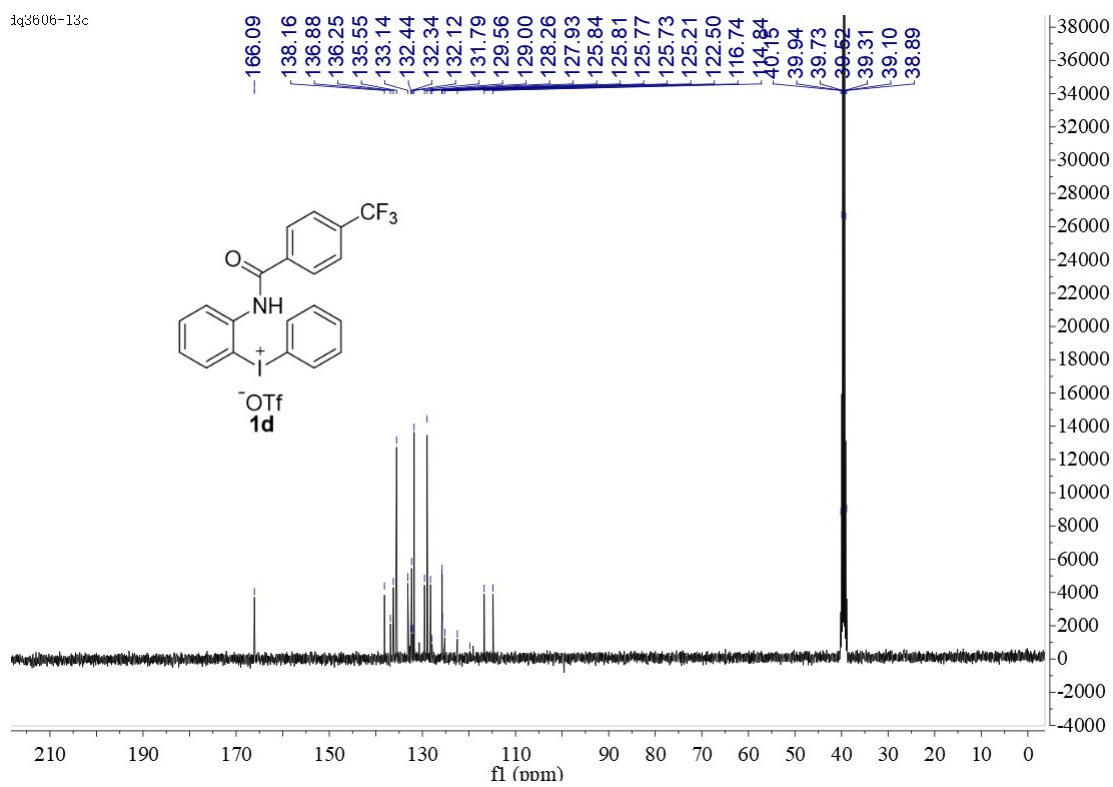

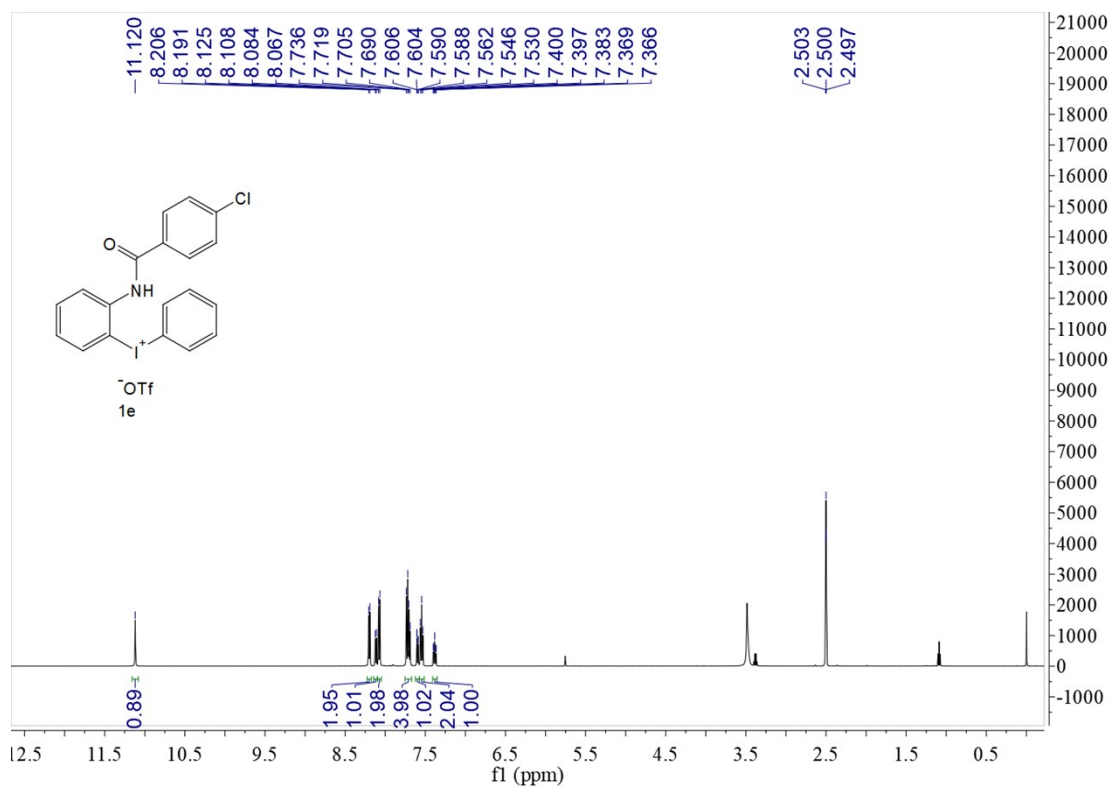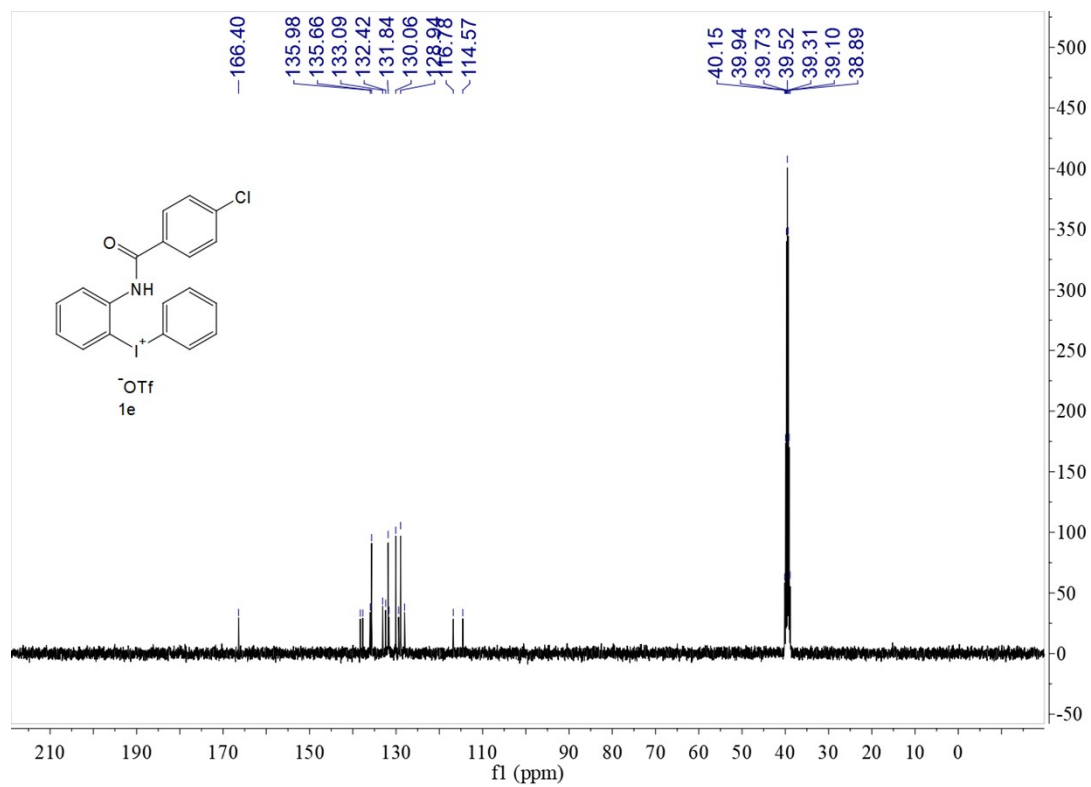



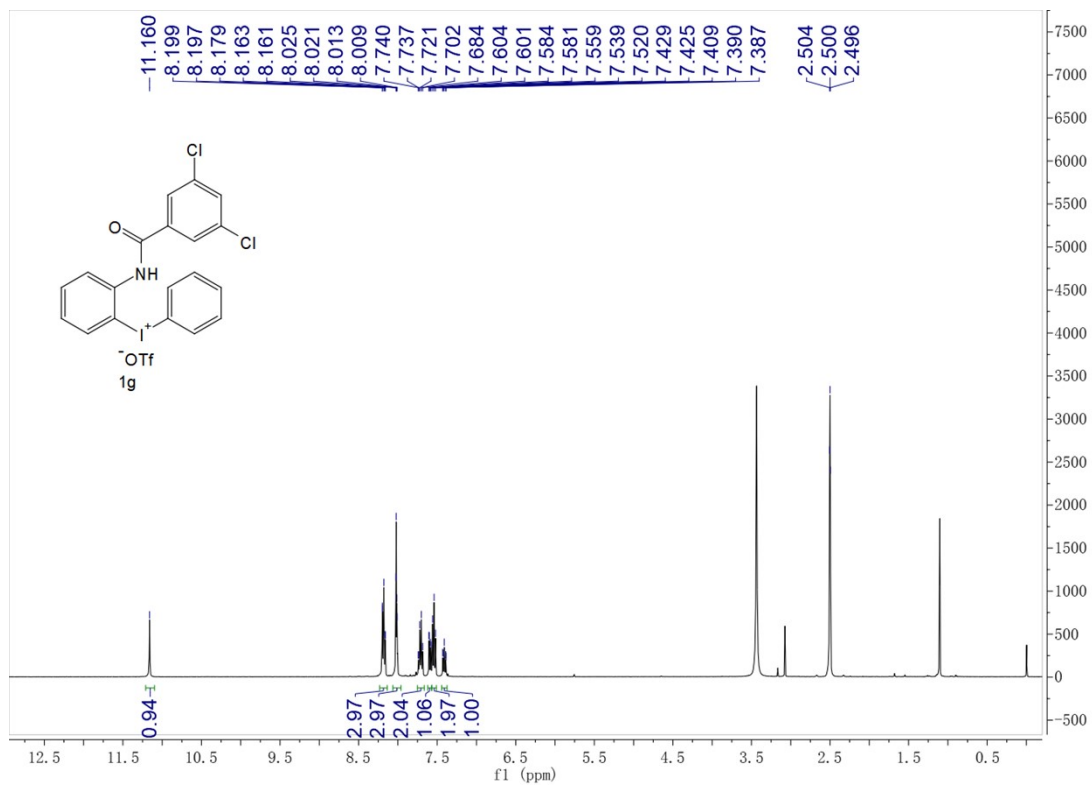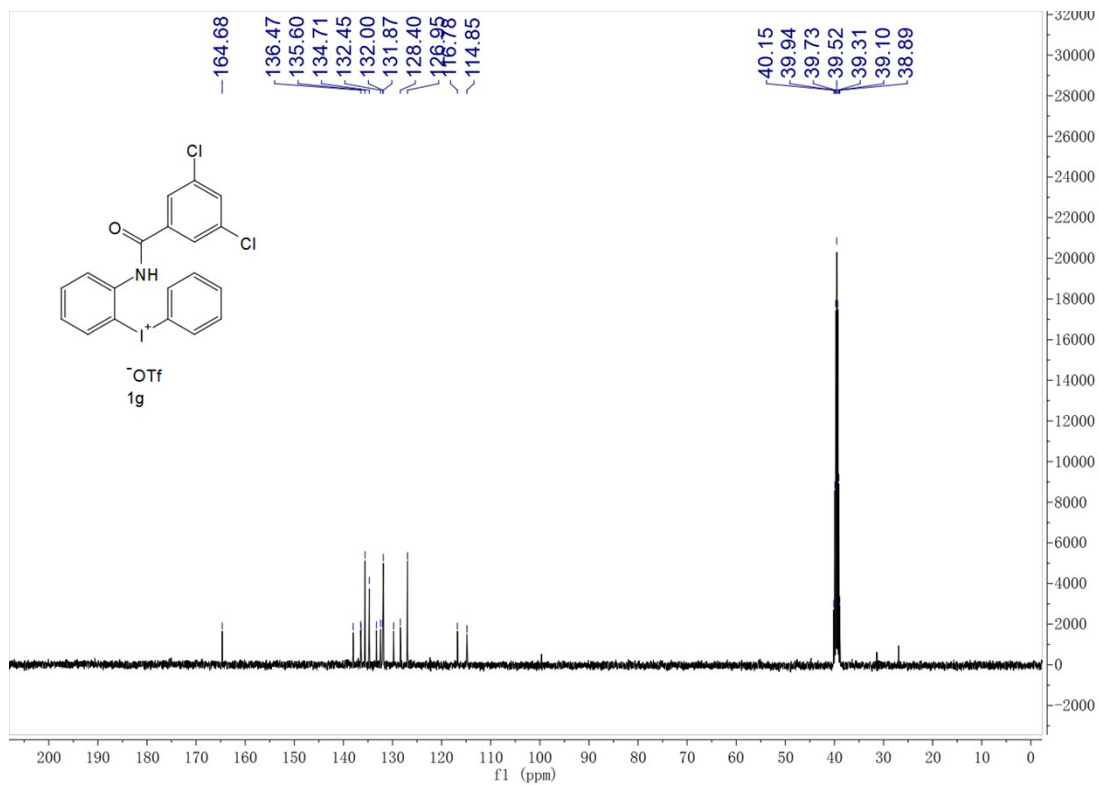

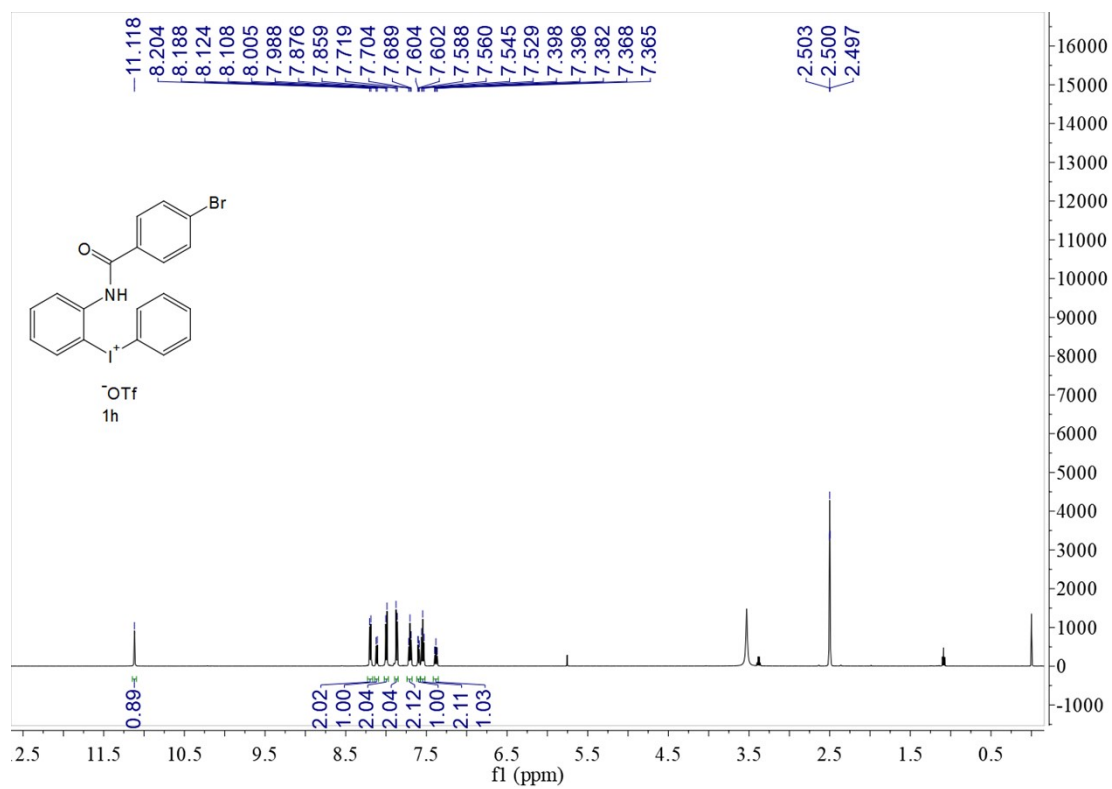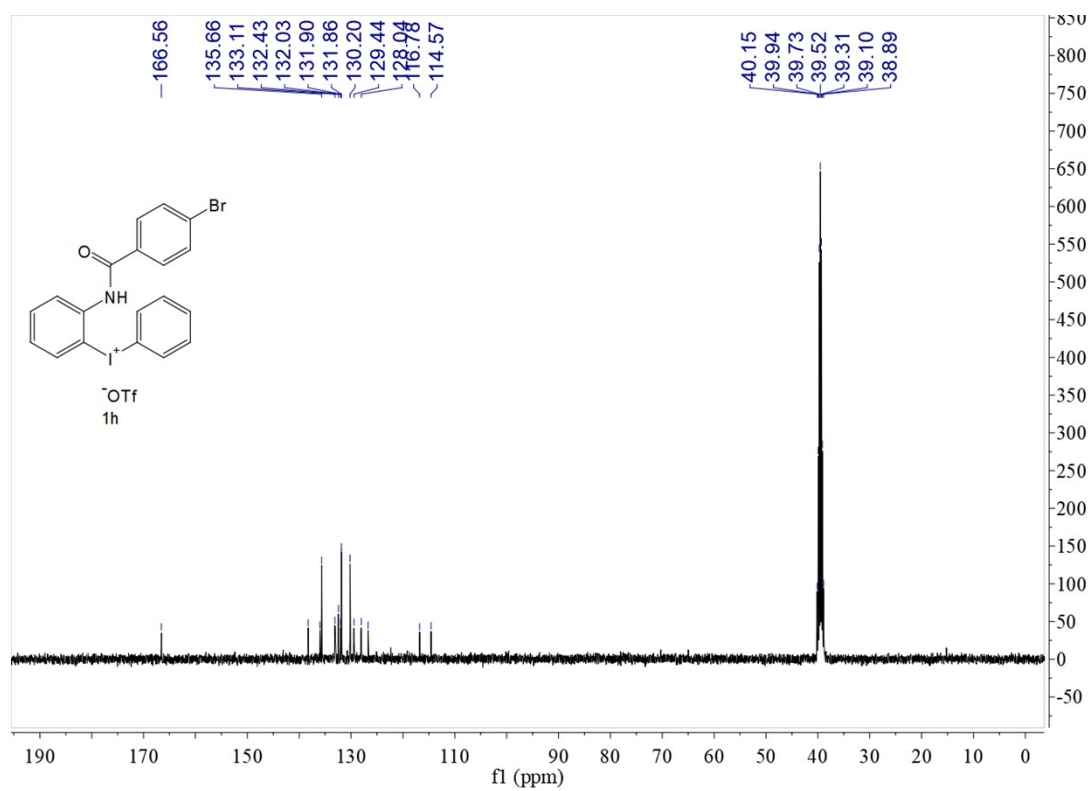

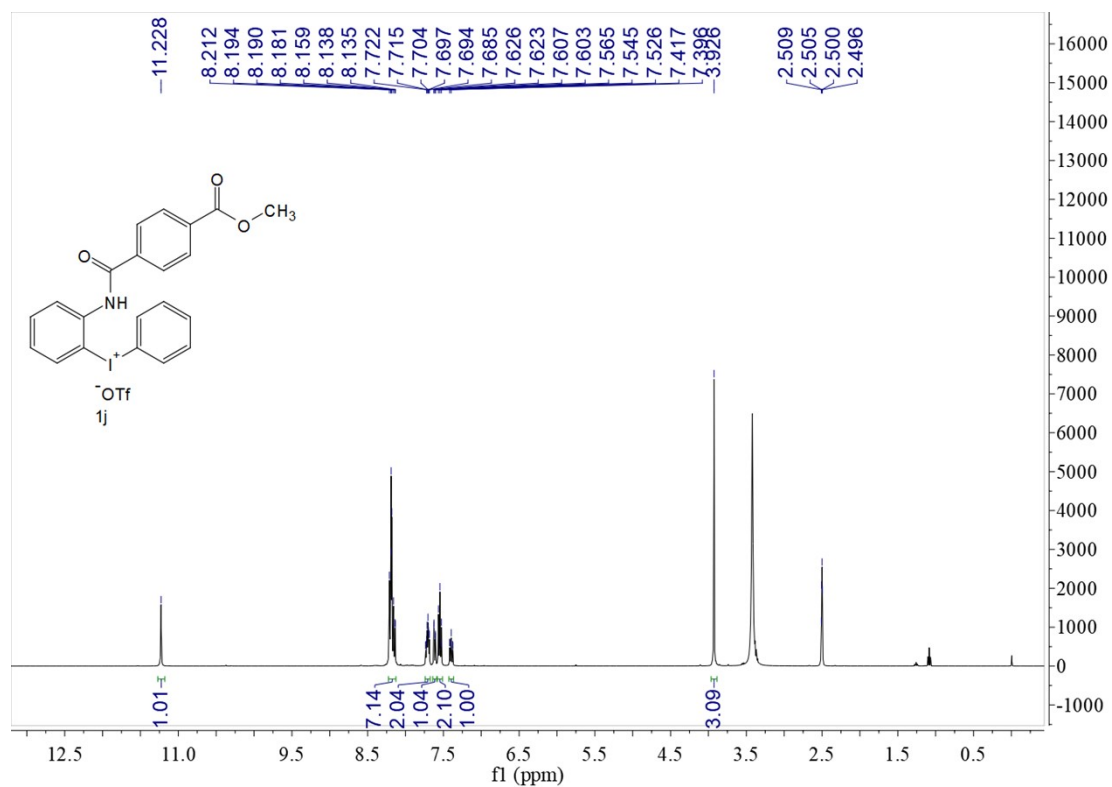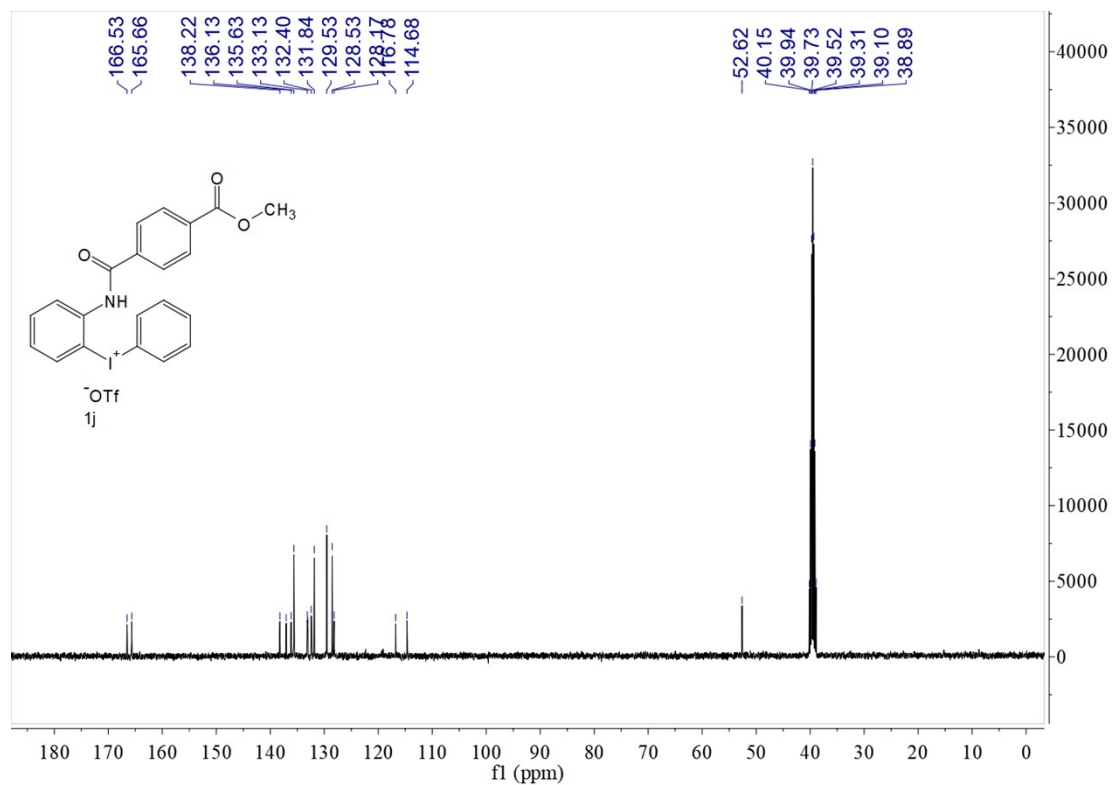

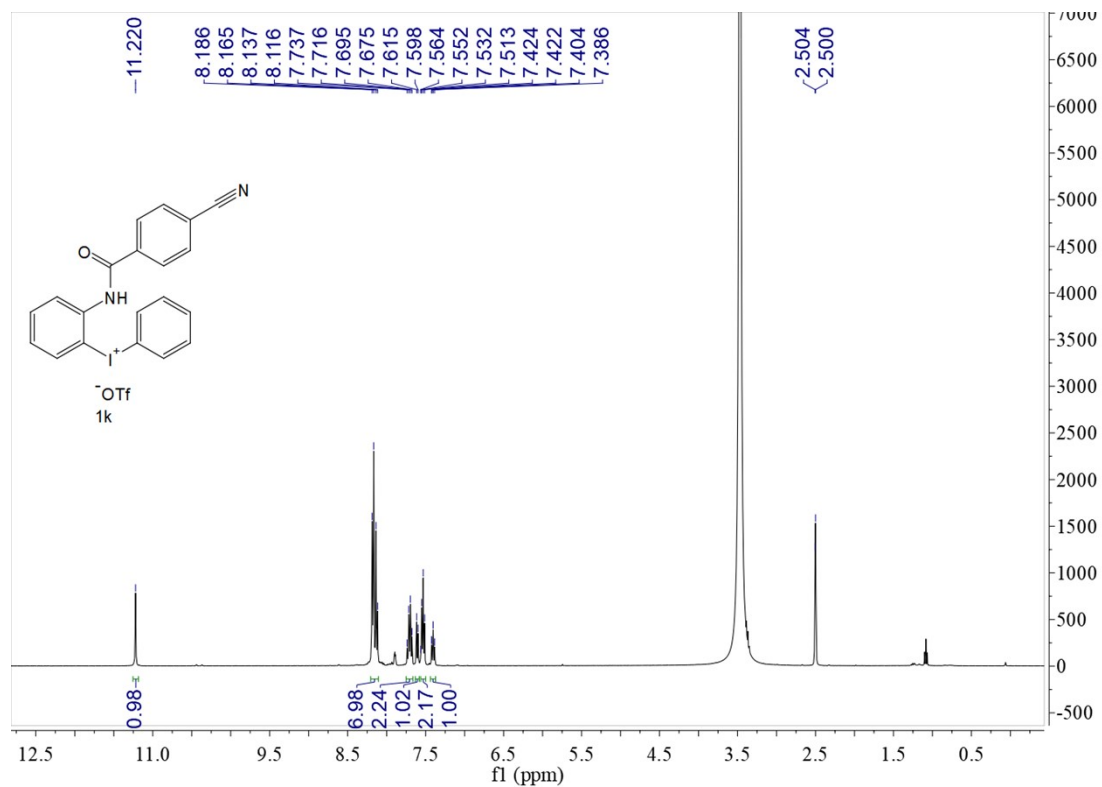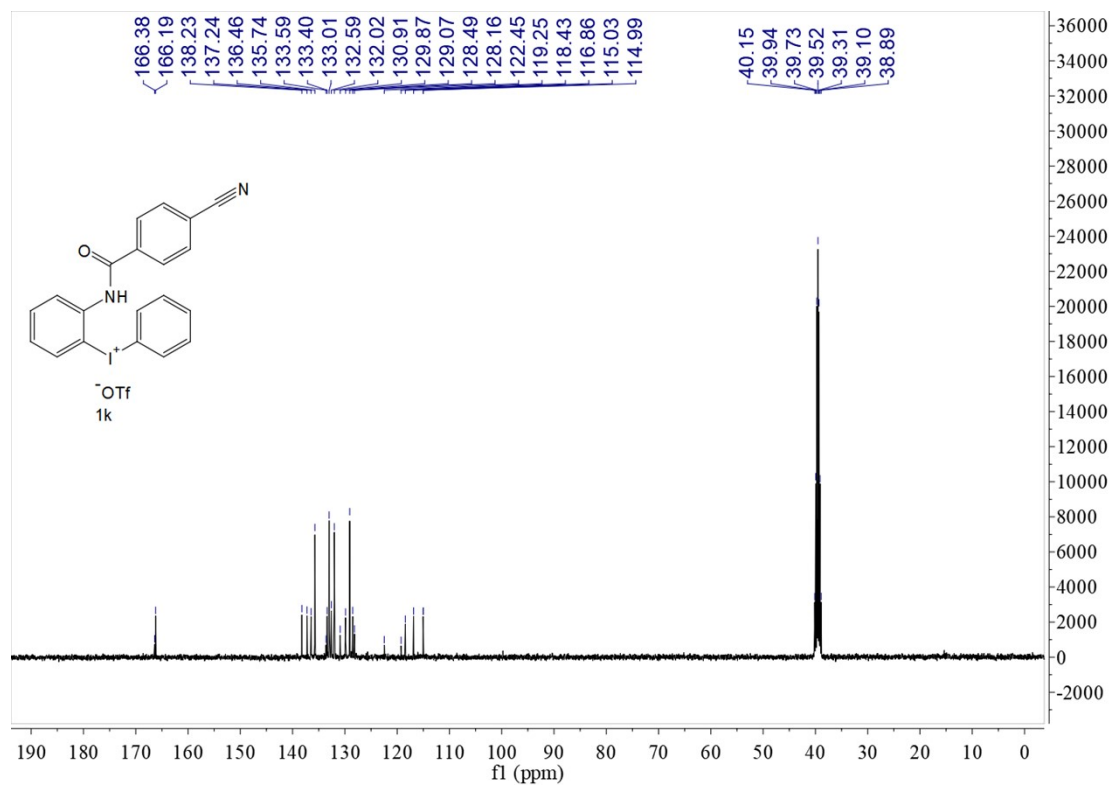

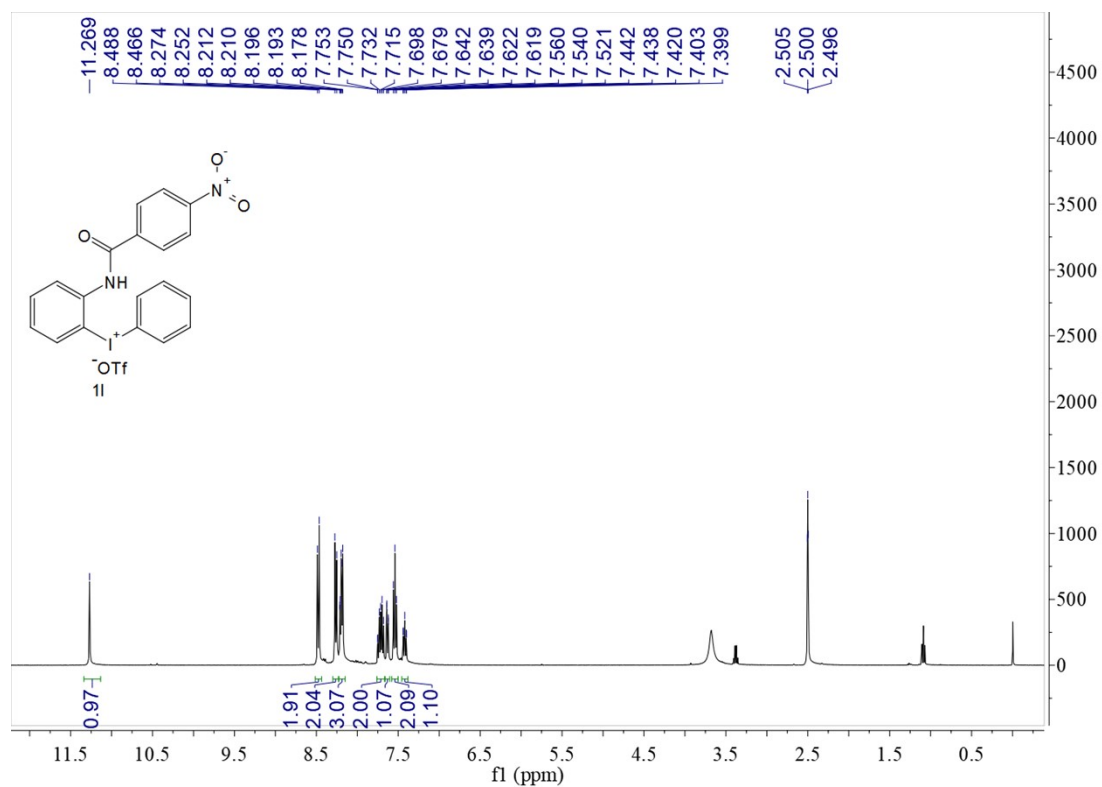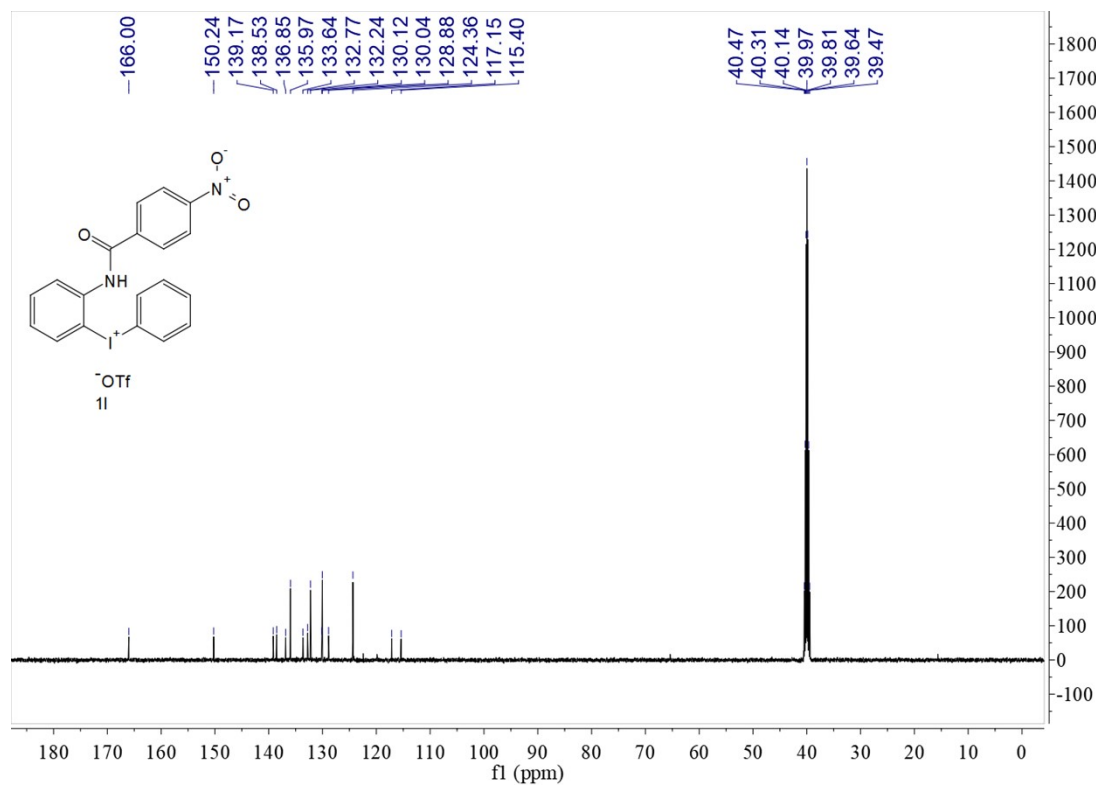

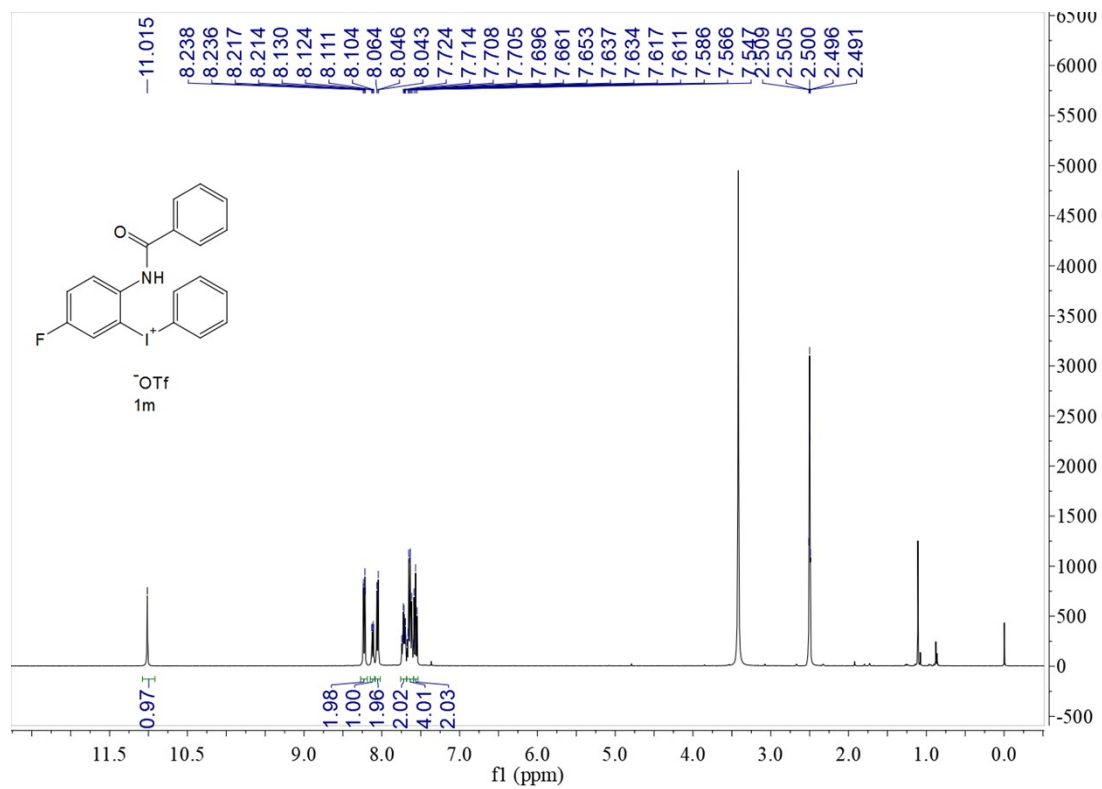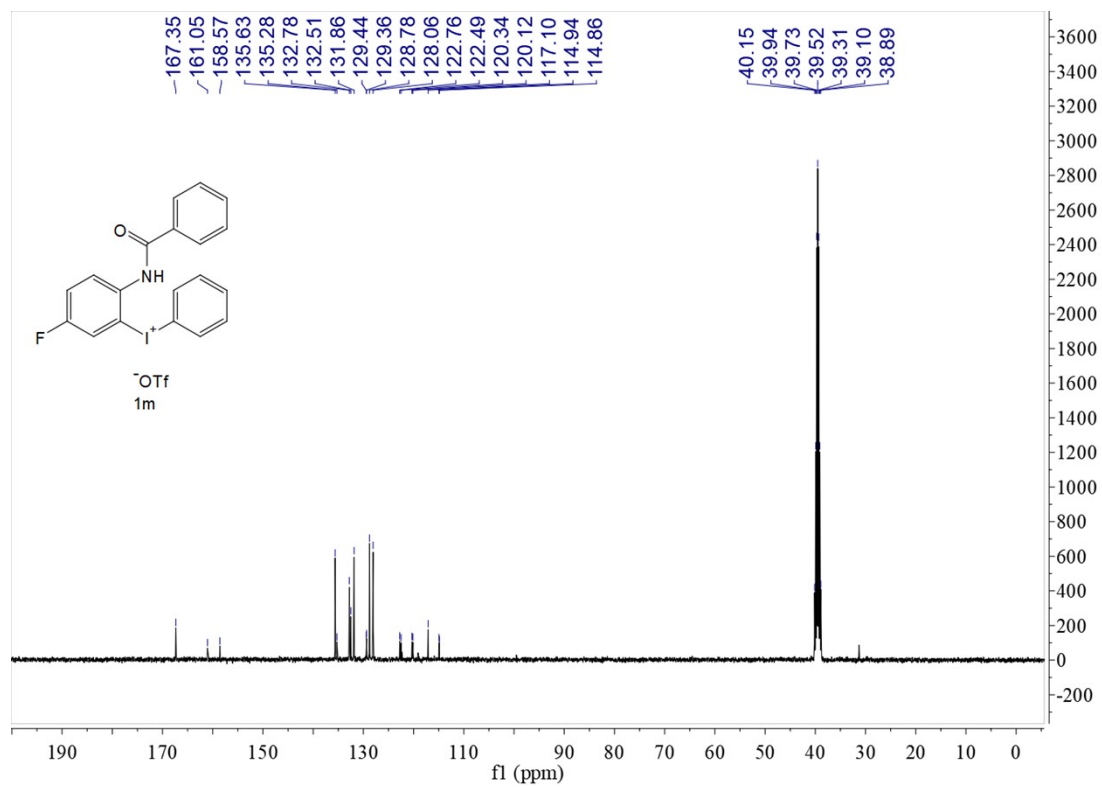

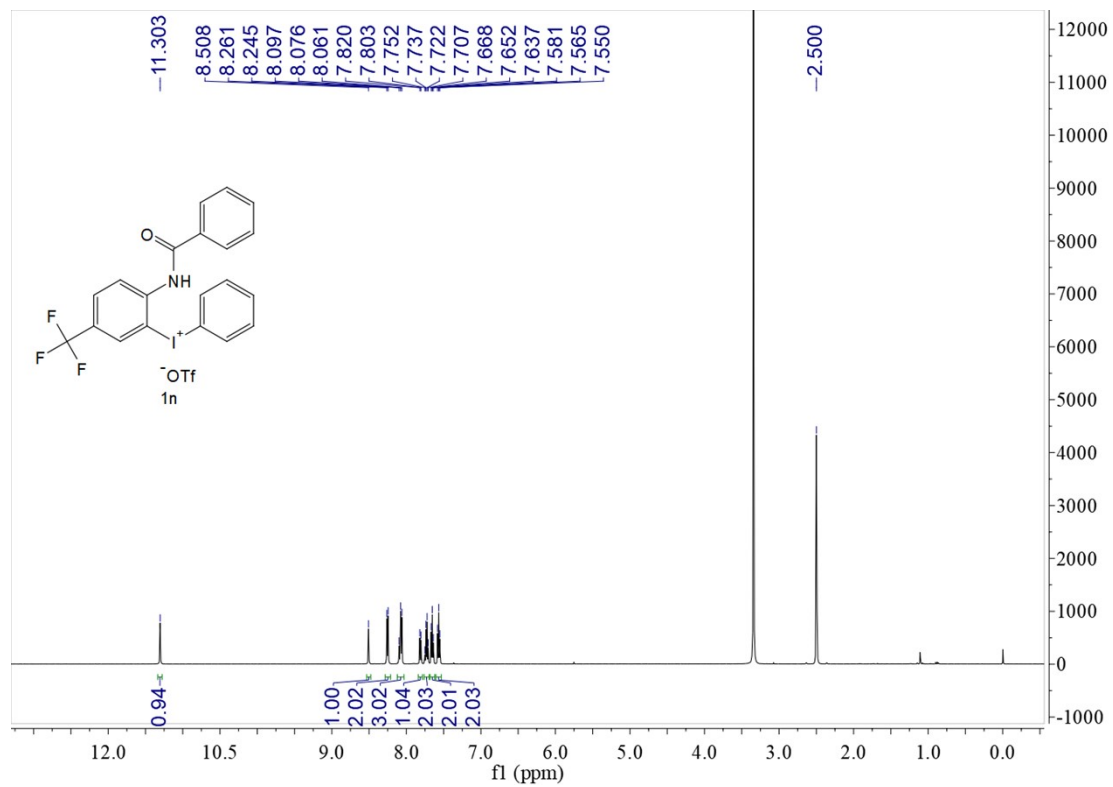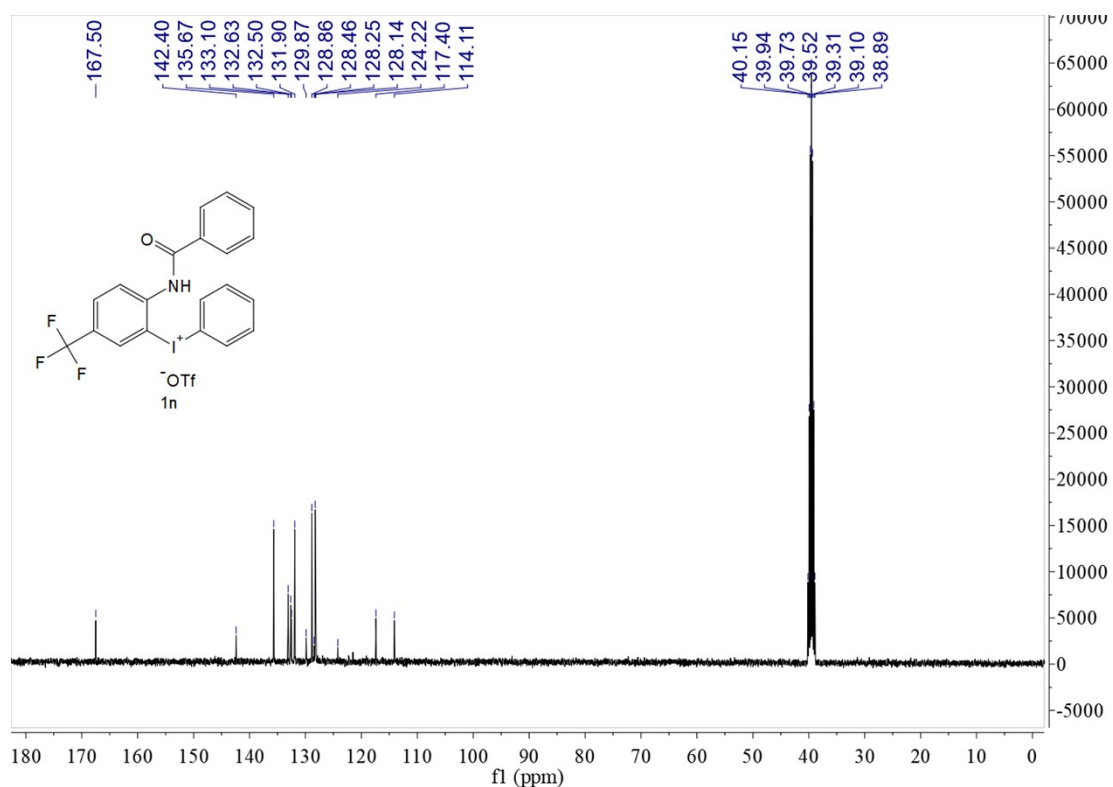

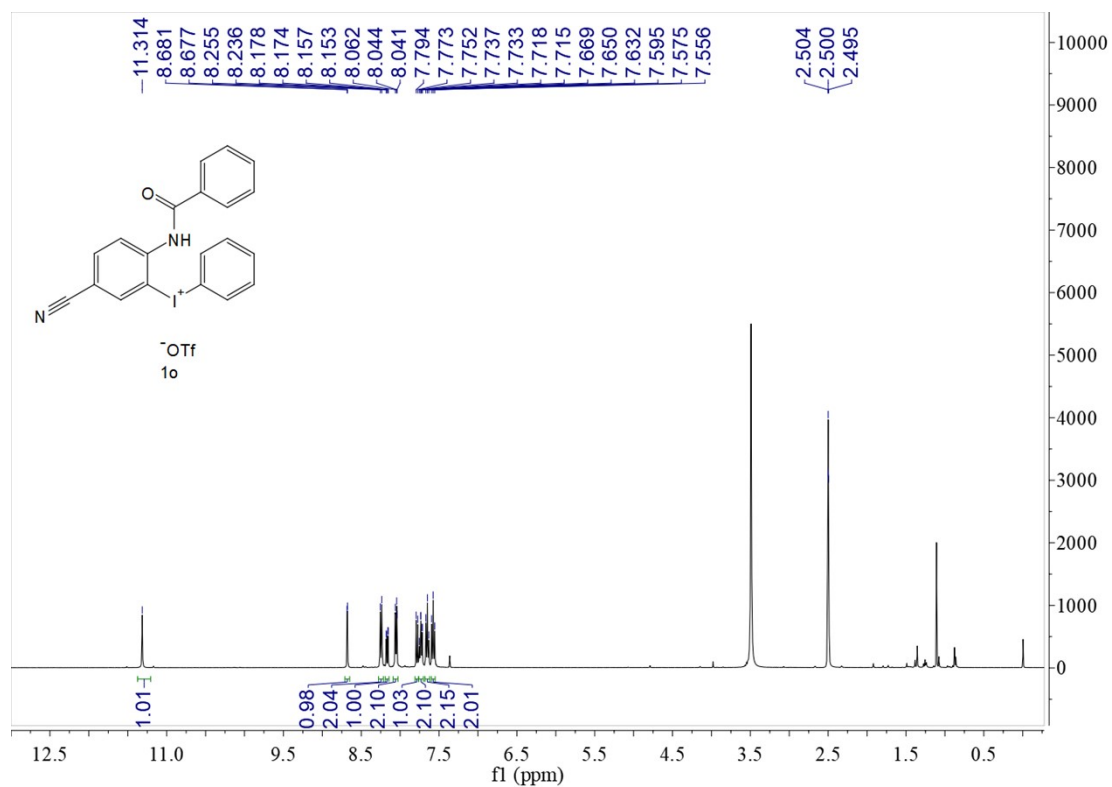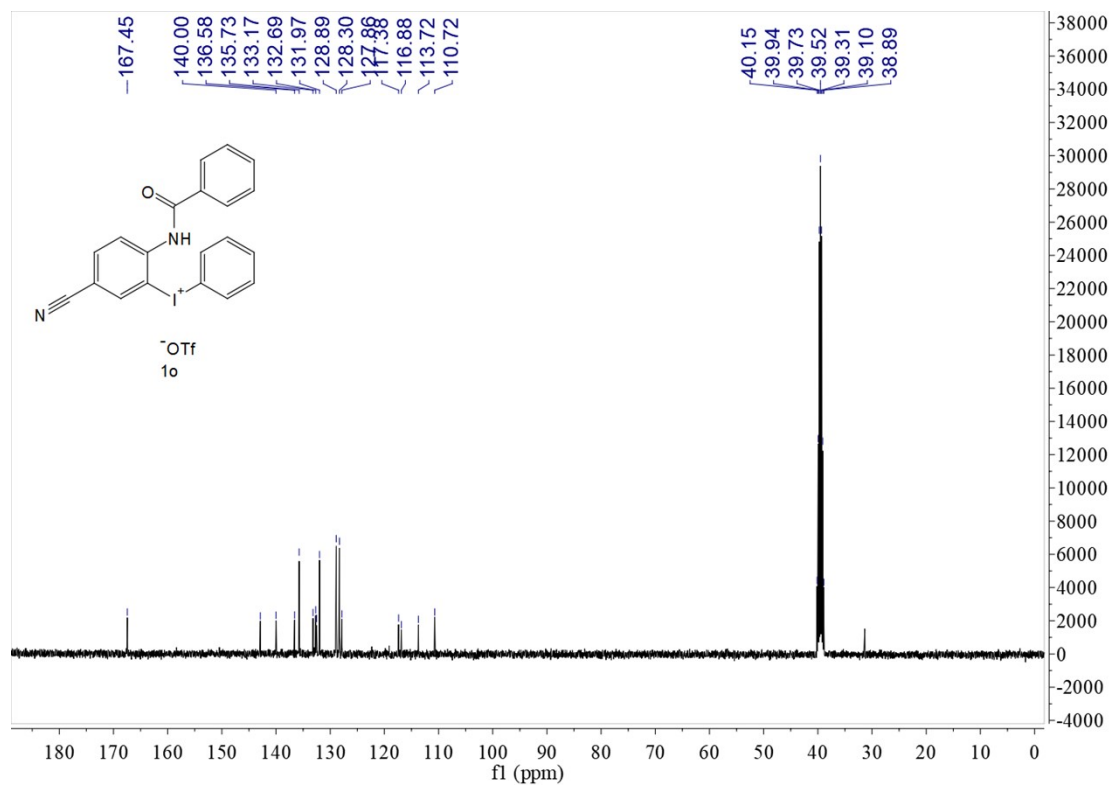



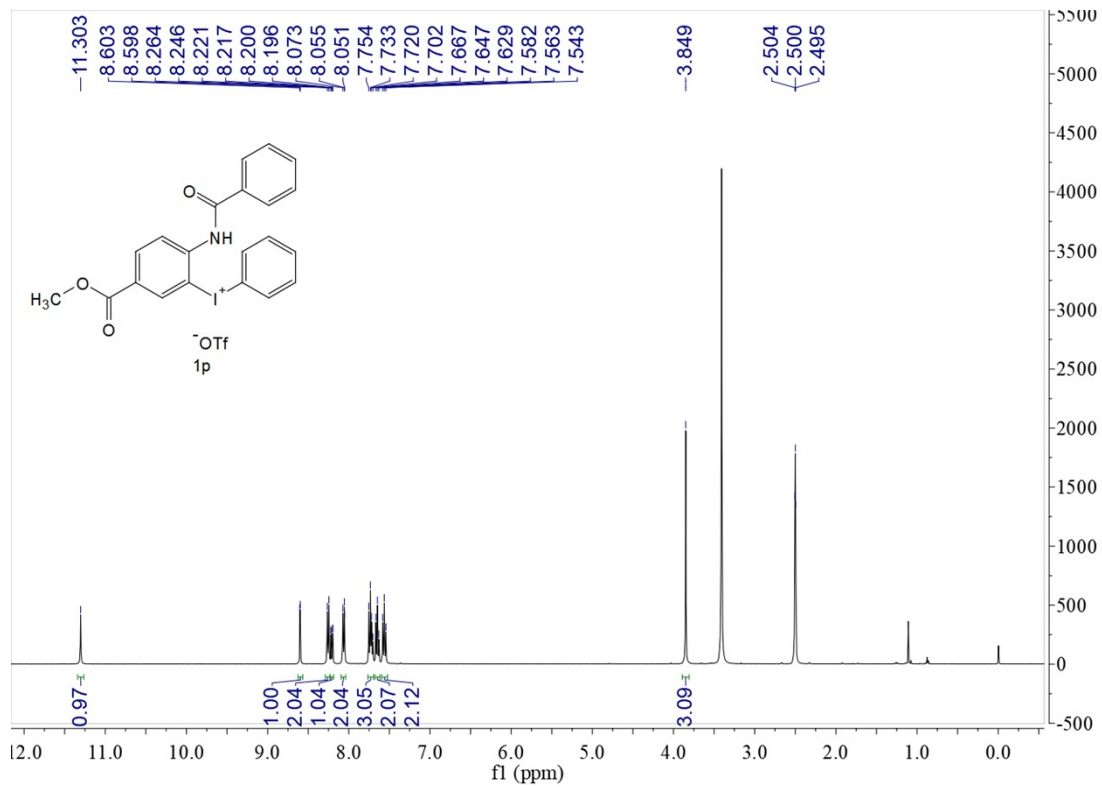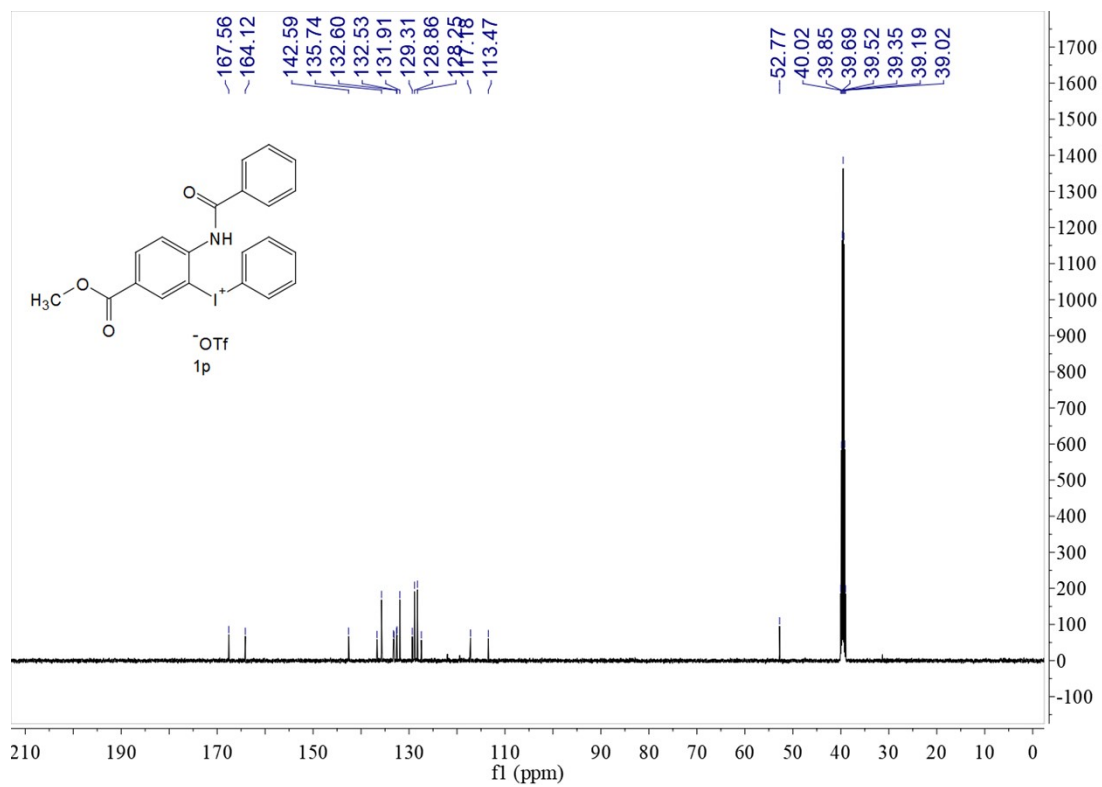

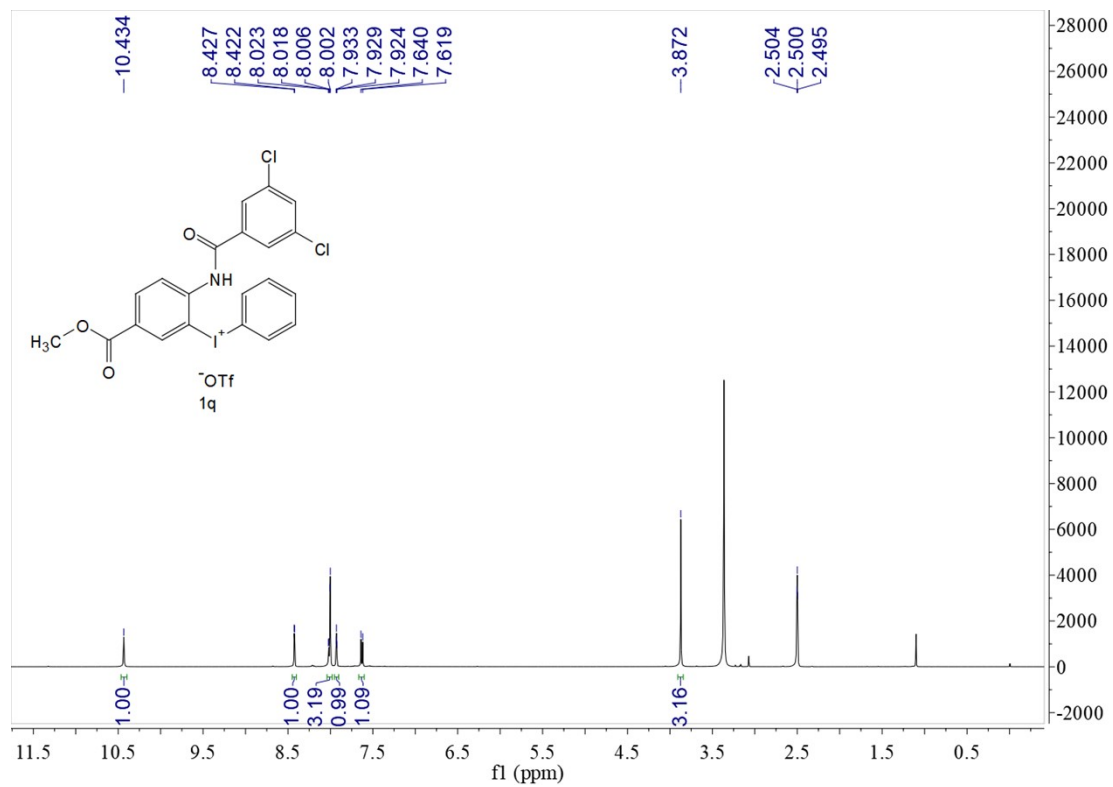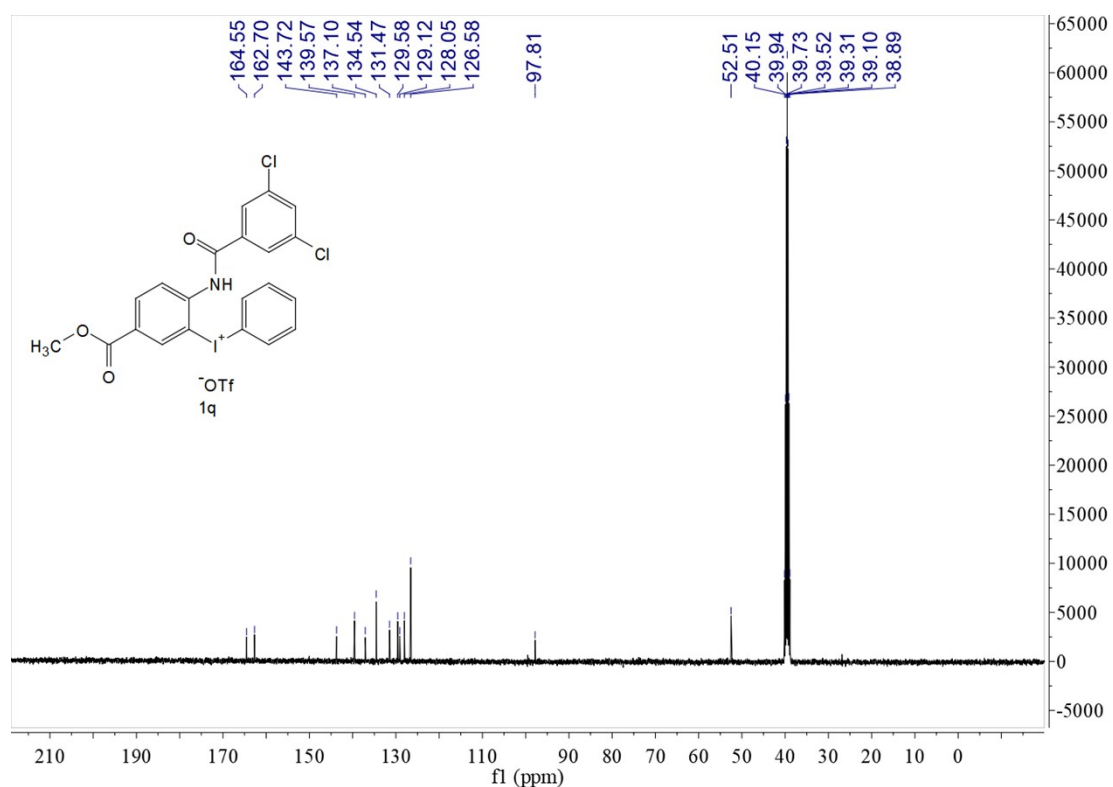

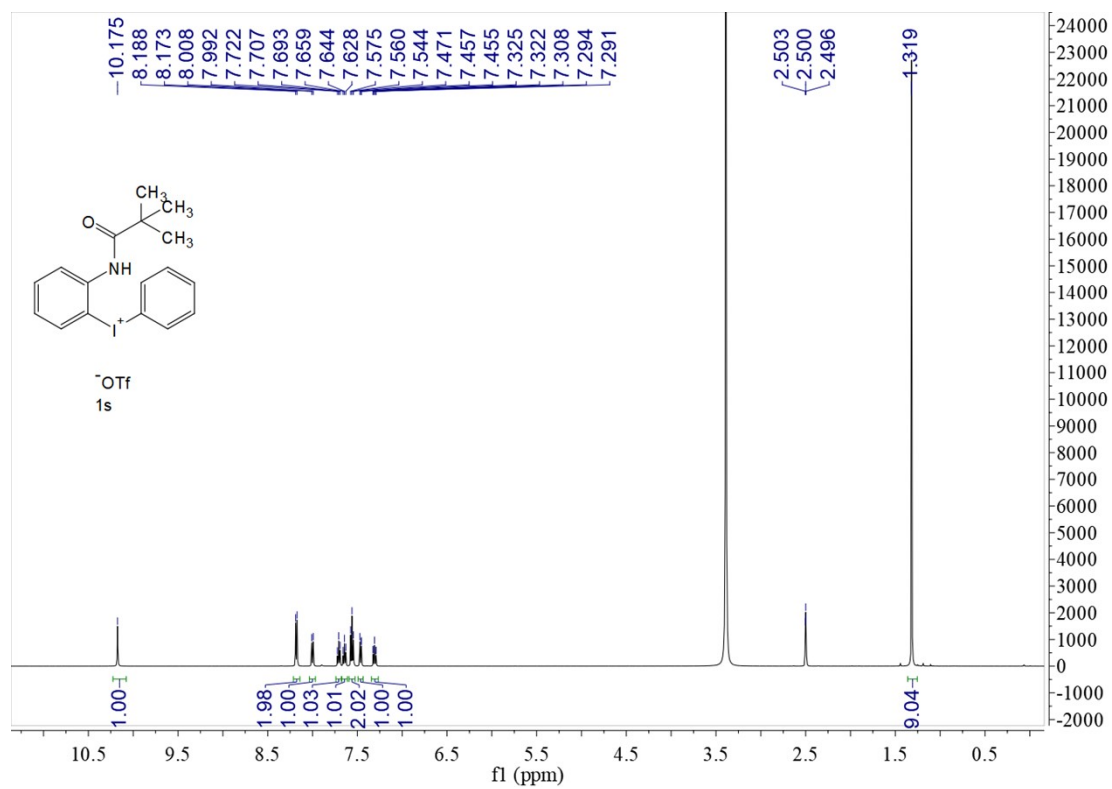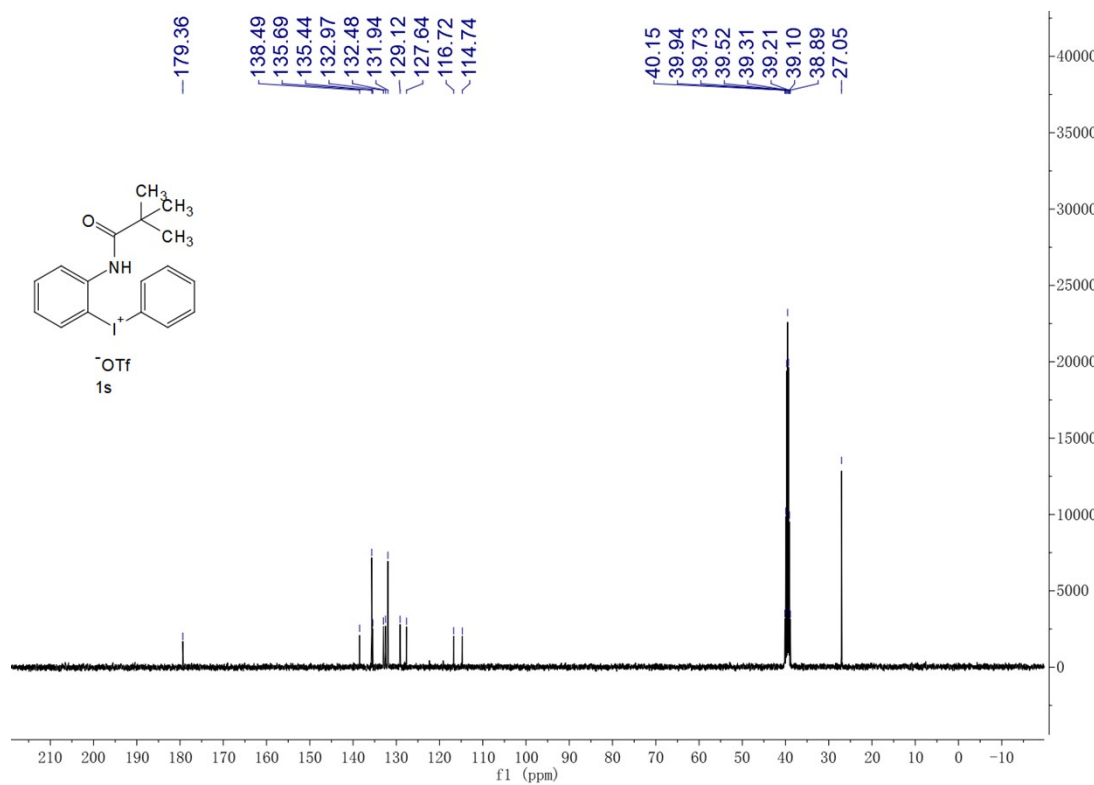

yy36

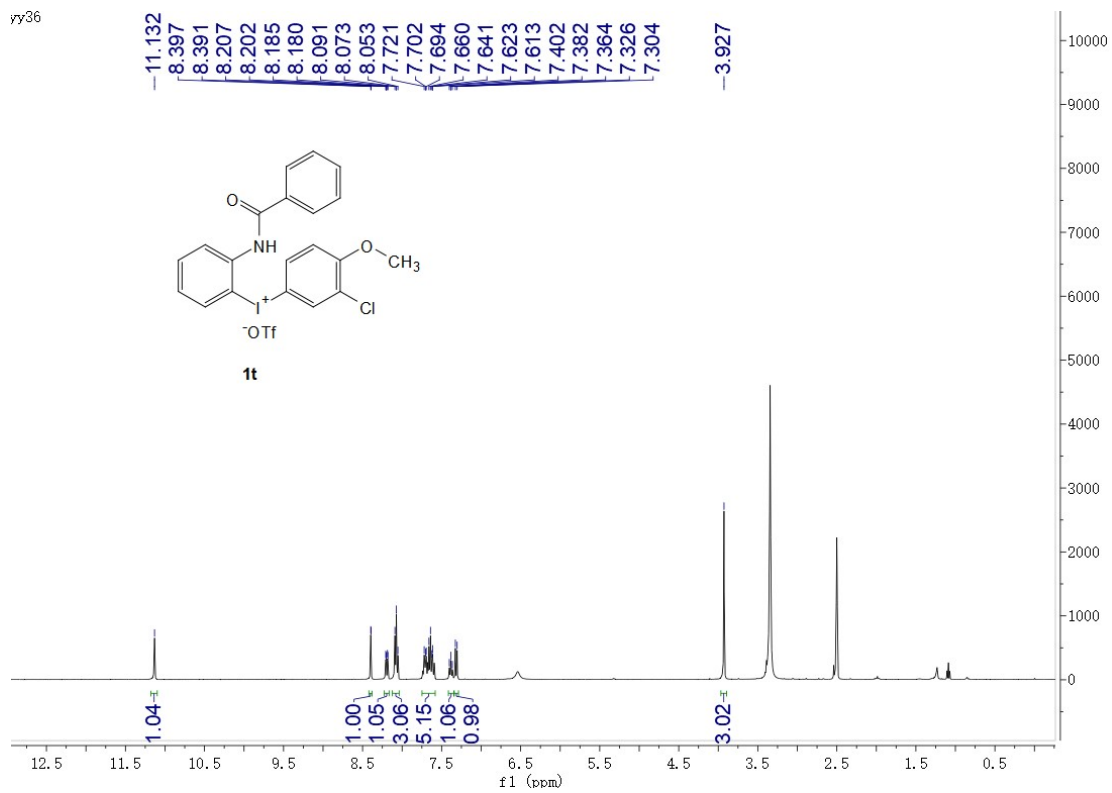

yy36-0103

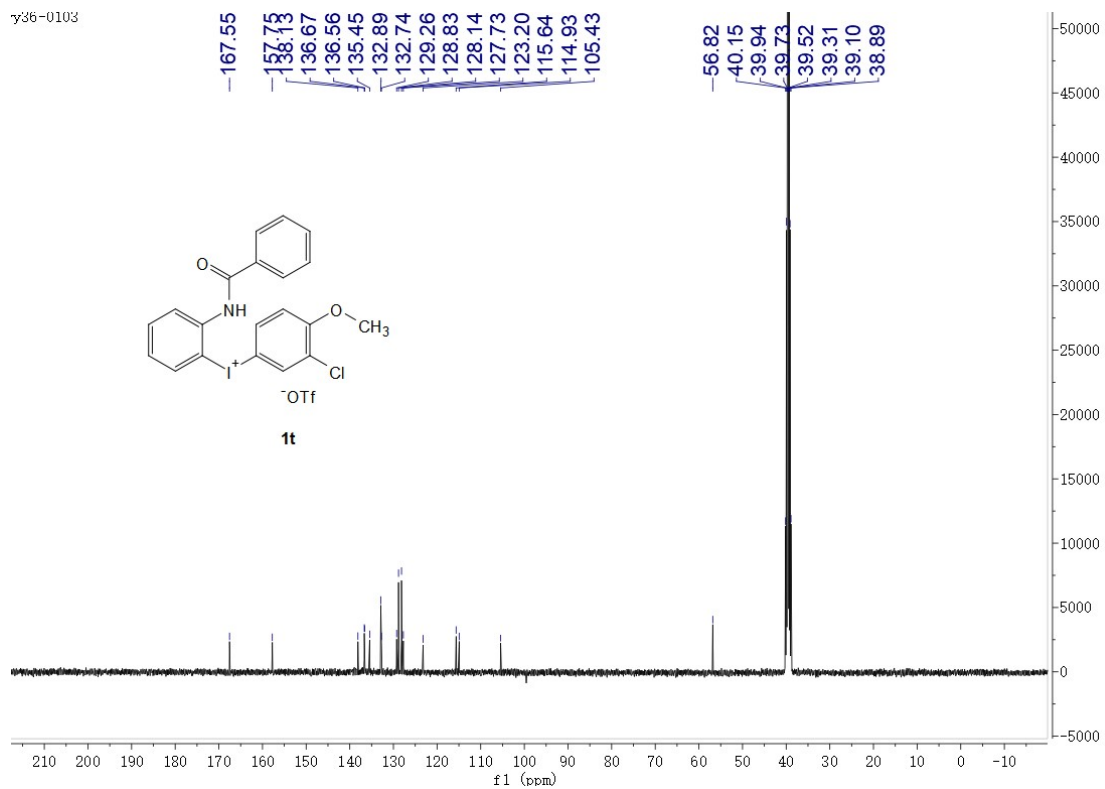

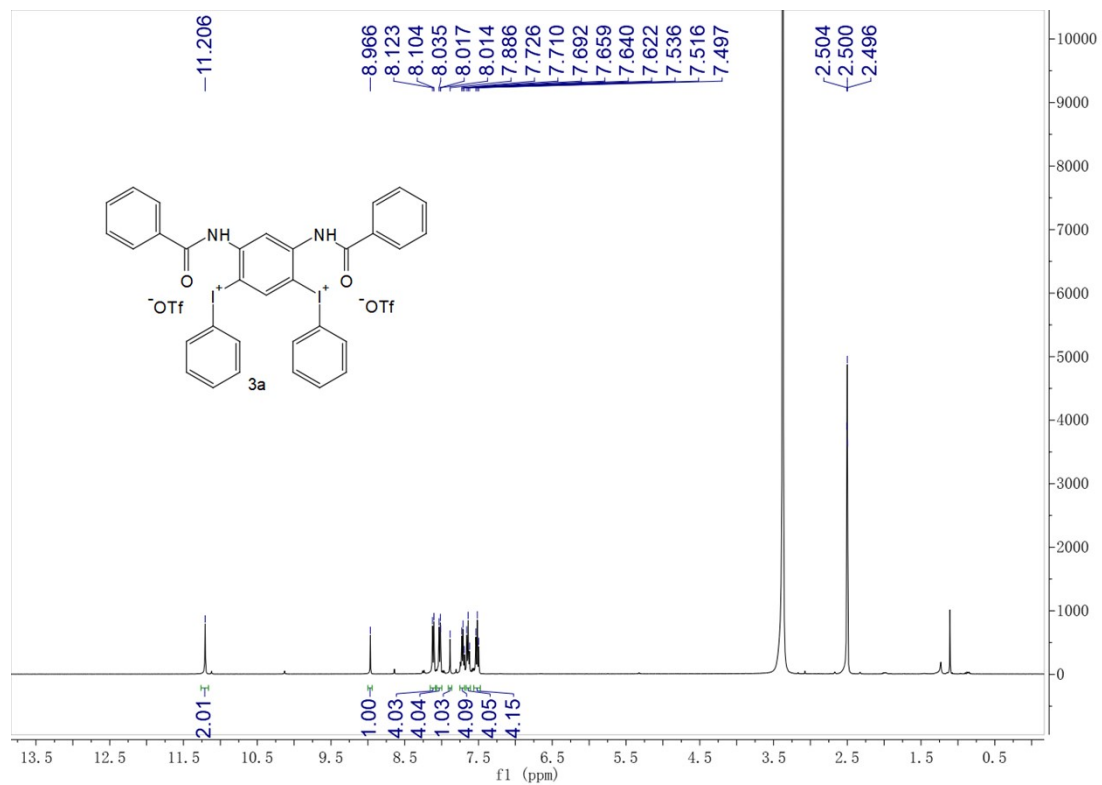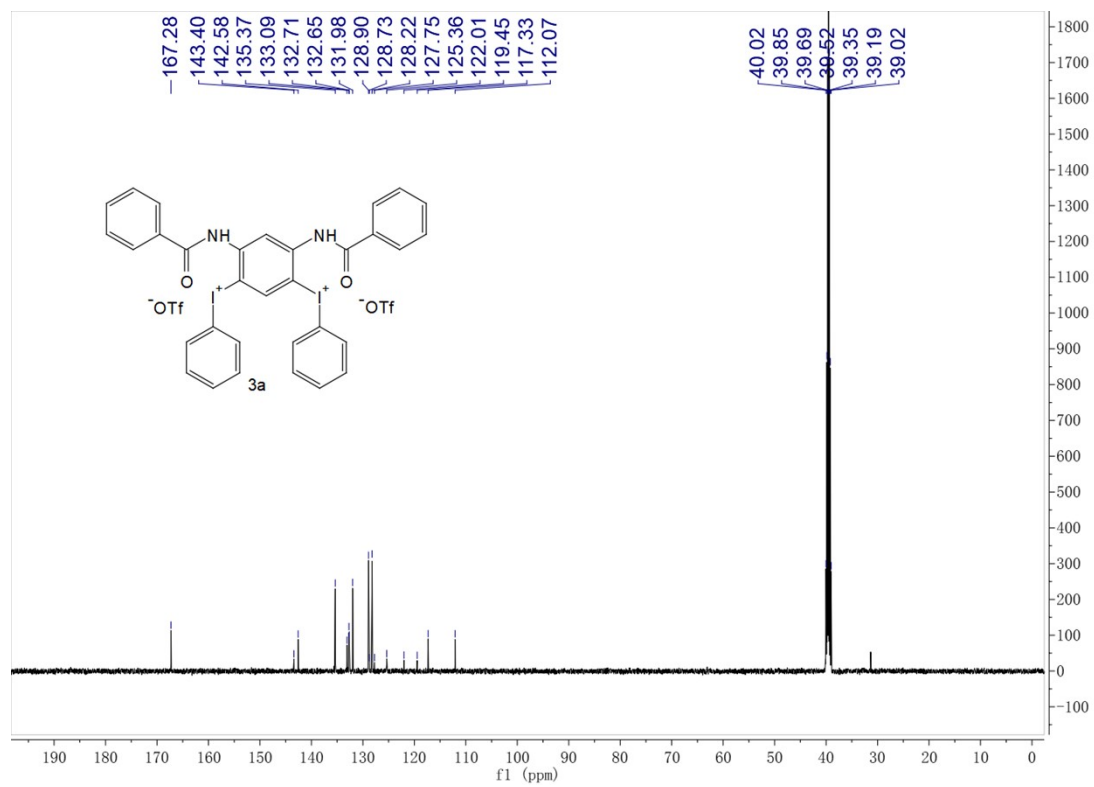

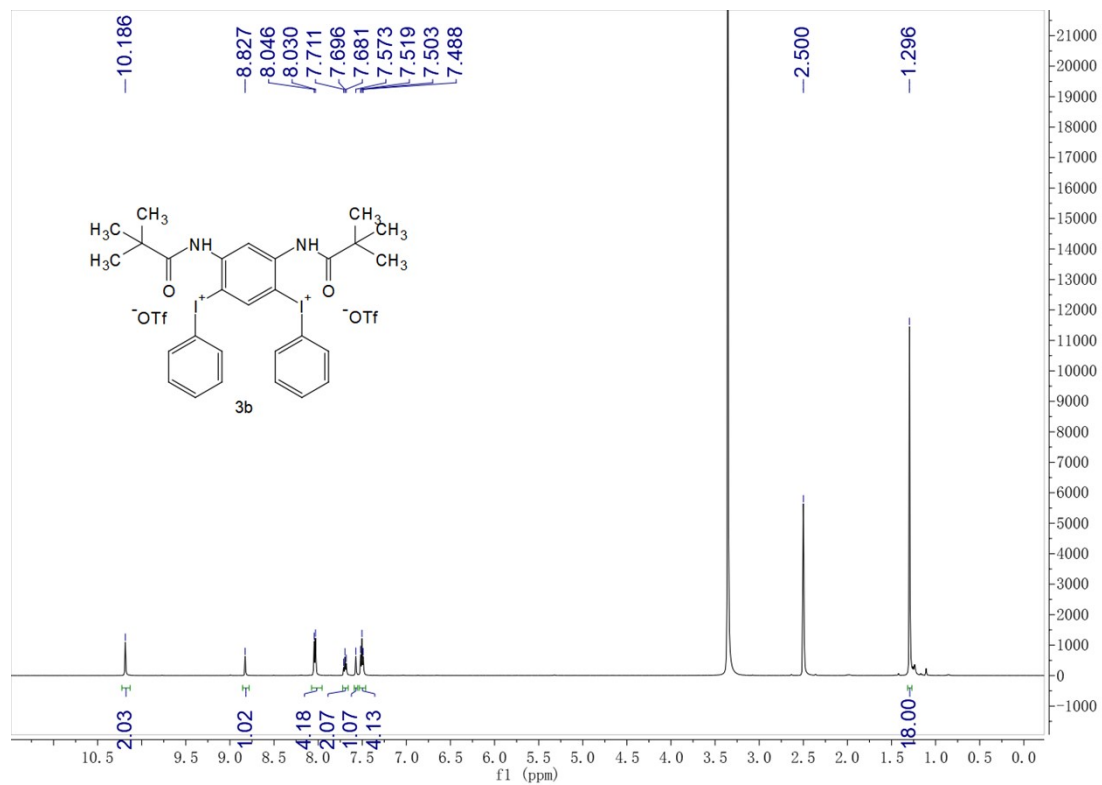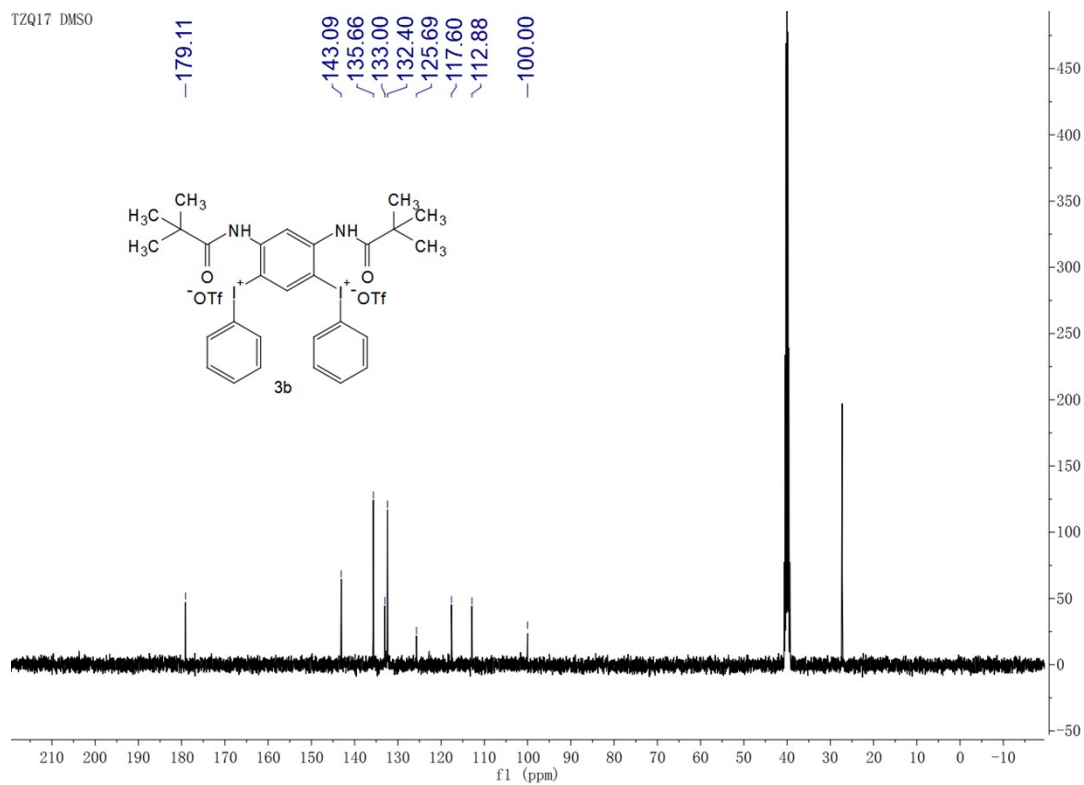

Supplement: d1qo01463c1.pdf [file d1qo01463c1.pdf]
